# Supplementary material for: The neurodevelopmental spectrum: phenotypic architecture, etiology, and predictive utility across development
Source: Research Square preprint supplement (doi:10.21203/rs.3.rs-7131496/v1), 2025-08-05
Supplement: Supplementary file 2 [file be49d24886a0760303102cad.xlsx]

## Sheet: ST1
Supplementary Table 1. Description of measures of neurodevelopmental and other psychiatric traits collected at age 7, 12 and 16
Measure	Description	Age 7 (P)	Age 12 (P)	Age 16 (P)	Age 16 (S)
Neurodevelopmental and psychiatric traits
Reports on neurodevelopmental diagnoses	Reports on diagnoses or frequent difficulties in hyperactivity/ADHD, autism, reading, maths, writing, motor skills/coordination difficulties, speech, tics, and other unspecified or general learning difficulties. Items were rated as present (1) or absent (0)	x
Strengths and Difficulties Questionnaire (SDQ) (Goodman, 1997)	Widely used questionnaire assessing hyperactivity-inattention, emotional problems, peer problems, conduct problems, and prosocial behaviour (reverse coded). Items were rated on a three-point Likert scale (2=Certainly true; 1=Sometimes true; 0=Not true)	x	x	x	x
DSM-IV ADHD symptoms	Items developed by the TEDS team reflecting DSM-IV symptoms of ADHD (e.g., difficulty waiting, difficulty completing tasks), rated on a three-point Likert scale (2=Certainly true; 1=Sometimes true; 0=Not true)	x
DSM-IV criteria for Asperger’s/autism	Items developed by the TEDS team reflecting DSM-IV symptoms of Asperger’s syndrome and autism (e.g., odd communication style, unusual eye gaze), rated on a three-point Likert scale (2=Certainly true; 1=Sometimes true; 0=Not true)	x
DSM-IV criteria for anxiety disorders and depression	Items developed by the TEDS team reflecting DSM-IV symptoms of anxiety and depression (e.g., shy/timid, self-critical), rated on a three-point Likert scale (2=Certainly true; 1=Sometimes true; 0=Not true)	x
Psychopathy	Items developed by the TEDS team reflecting psychopathic traits (e.g., emotions not genuine, self more important than others), rated on a three-point Likert scale (2=Certainly true; 1=Sometimes true; 0=Not true)	x
Conners Parent Rating Scale-Revised (CPRS-R) (Conners, 2003)	Questionnaire assessing DSM-IV symptoms of ADHD, including inattentive and hyperactive-impulsive symptoms. Items were rated on a four-point Likert scale (3=Very much true; 2=Pretty much true; 1=Just a little bit true; 0=Not true at all).		x	x
Childhood Autism Spectrum Test (CAST) (Scott et al., 2002)	Screening tool commonly used to assess autistic traits in children. Items were rated as Yes (1) or No (2).		x
Short Moods and Feelings Questionnaire (sMFQ) (Angold et al., 1995)	Screeing tool assessing depressive symptom. Items were rated on a three-point Likert scale (2=Certainly true; 1=Somewhat true; 0=Not true).		x	x
Antisocial Process Screening Device (APSD) (Frick & Hare, 2001)	Questionnaire assessing traits associated with antisocial behaviour, including callous-unemotional traits, aggression, impulsivity and conduct problems. Items were rated on a three-point Likert scale (2=Certainly true; 1=Somewhat true; 0=Not true).		x
Abbreviated Autism Spectrum Quotient (AQ) (Baron-Cohen et al., 2001)	Questionnaire measuring the degree to which adults (16+) with average intelligence have the traits associated with the autistic spectrum. Items were rated on a four-point Likert scale (3=Strongly agree; 2=Slightly agree; 1=Slightly disagree; 0=Strongly disagree).			x
Anxiety‐related Behaviours Questionnaire (ARBQ) (Eley et al., 2003)	Questionnaire assessing anxiety traits, including social anxiety, obsessive-compulsive behaviour, negative affect and negative cognition. Items were rated on a three-point Likert scale (2=Very true; 1=Quite true; 0=Not true).			x
Children's Anxiety Sensitivity Index (CASI) (Silverman et al., 1991)	Questionnaire measuring anxiety sensitivity (i.e., the belief that anxiety symptoms have negative consequences. Items were rated on a three-point Likert scale (2=Very true; 1=Quite true; 0=Not true).			x
Specific Psychotic Experiences Questionnaire (SPEQ) - Scale for the Assessment of Negative Symptoms (SANS) subscale (Ronald et al., 2014)	Subscale assessing negative symptoms associated with psychosis (e.g., schizophrenia), including affective flattening, alogia, avolition/apathy, anhedonia/asociality and attention/concentration problems. Items were rated on a four-point Likert scale (3=Definitely true; 2=Mainly true; 1=Somewhat true; 0=Not at all true).			x
Inventory of Callous-Unemotional Traits (ICUT) (Frick, 2004; Kimonis et al., 2008)	Questionnaire measuring callous, unemotional and uncaring traits. Items were rated on a four-point Likert scale (3=Definitely true; 2=Mainly true; 1=Somewhat true; 0=Not at all true).			x
Strengths and Weaknesses of Attention-Deficit/Hyperactivity Disorder Symptoms and Normal Behavior Scale (SWAN) (Swanson et al., 2005)	Adaptation of the original SWAN scale to assess ADHD traits in an adolescent sample. Items are rated on a 7-point Likert scale (7=Far above average; 6=Above average; 5=Slightly above average; 4=Average; 3=Slightly below average; 2=Below average; 1=Far below average).				x
Specific Psychotic Experiences Questionnaire (SPEQ) - Temporal Experience of Pleasure Scale (TEPS) subscale (Ronald et al., 2014)	Subscale assessing the experience of pleasure (e.g., looking forward to something exciting, being unable to sleep out of excitement for a major holiday). Items were rated on a six-point Likert scale (1=Very false for me, 2=False for me, 3=Slightly false for me, 4=Slightly true for me, 5=True for me, 6=Very true for me).				x
Specific Psychotic Experiences Questionnaire (SPEQ) - Cognitive Disorganisation subscale (Ronald et al., 2014)	Subscale assessing problems with attention and concentration (e.g., ignoring distractions, avoiding careless mistakes). Items were rated on a seven-point Likert scale (1=Far below average, 2=Below average, 3=Slightly below average, 4=Average, 5=Slightly above average, 6=Above average, 7=Far above average)				x
Specific Psychotic Experiences Questionnaire (SPEQ) – Paranoia subscale (Ronald et al., 2014)	Subscale assessing the frequency of paranoid thoughts (e.g., thinking people are trying to upset you, thinking you are under threat from others). Items were rated on a six-point Likert scale (1= Not at all, 2=Rarely, 3=Once a month, 4=Once a week, 5=Several times a week, 6=Daily)				x
Specific Psychotic Experiences Questionnaire (SPEQ) - Hallucinations subscale (Ronald et al., 2014)	Subscale assessing the frequency of hallucinations and perceptual anomalies (e.g., noticing smells that others seem unaware of, hearing sounds when there is nothing to explain them). Items were rated on a six-point Likert scale (1= Not at all, 2=Rarely, 3=Once a month, 4=Once a week, 5=Several times a week, 6=Daily)				x
Specific Psychotic Experiences Questionnaire (SPEQ) – Grandiosity subscale (Ronald et al., 2014)	Subscale assessing one's sense of self-importance and uniqueness (e.g., feeling everything you do is great, thinking you are/are destined to be someone very important). Items were rated on a four-point Likert scale (1=Not at all, 2=Somewhat, 3=A great deal, 4=Completely)				x
Oxford-Liverpool Inventory of Feelings and Experiences (O-LIFE) Introvertive Anhedonia (Mason et al., 2005)	Questionnaire measuring enjoyment from social and physical sources of pleasure and avoidance of intimacy (e.g., feeling close to friends, feeling uncomfortable with touch). Items were rated as yes (1) or no (0)				x
Eating Disorder Diagnostic Scale (EDDS) (Stice et al., 2004)	Questonnaire assessing symptoms of anorexia nervosa, bulimia nervosa, and binge eating disorder. Items were rated on a seven-point Likert scale (1=Not at all, 3=Slightly, 5=Moderately, 7=Extremely)				x
Self Report Delinquency Scale (Elliott et al., 1985)	Questionnaire assessing the number of delinquent behaviours performed by a person (e.g., stealing something, running away from home). Items were rated as Yes (1) or No (0)				x
Note: The ‘x’ on the right-hand side indicates whether the measure was completed at age 7, 12, or 16 by the parent (P) or child (C).
References
Angold, A., Costello, E. J., Messer, S. C., Pickles, A., Winder, F., and Silver, D. (1995). The development of a short questionnaire for use in epidemiological studies of depression in children and adolescents. International Journal of Methods in Psychiatric Research, 5, 1-12.
Baron-Cohen, S., Wheelwright, S., Skinner, R., Martin, J., and Clubley, E. (2001) The autism-spectrum quotient (AQ): evidence from Asperger syndrome/high-functioning autism, males and females, scientists and mathematicians. J Autism Dev Disord 31(1): 5-17
Conners C.K. (2003): Conners’ Rating Scales-Revised: Technical Manual. New York: Multi-Health System Inc.
Eley, T.C., Bolton, D., O’Connor, T.G., Perrin, S., Smith, P. and Plomin, R. (2003). A twin study of anxiety related behaviours in pre-school children. Journal of Child Psychology and Psychiatry, 44: 945 - 960
Elliott, D.S., Huizinga, D. and Ageton, S. (1985) Explaining delinquency and drug use. Sage Publications (Beverly Hills, California)
Forty, L., Kelly, M., Jones, L., Jones, I., Barnes, E., Caesar, S., Fraser, C., Gordon-Smith, K., Griffiths, E., Craddock, N., & Smith, D. J. (2010). Reducing the Hypomania Checklist (HCL-32) to a 16-item version. Journal of affective disorders, 124(3), 351–356.
Frick, P.J. (2004). The Inventory of Callous–Unemotional Traits. PLoS One.
Frick, P. J., & Hare, R. (2001). Antisocial process screening device. Toronto, Canada: Multi-Health Systems.
Goodman, R. (1997). The Strengths and Difficulties Questionnaire: A Research Note. Journal of Child Psychology and Psychiatry, 38, 581-586
Kimonis, E.R., Frick, P.J., Skeem, J. L., Marsee, M. A., Cruise, K., Munoz, L. C., ... & Morris, A. S. (2008) Assessing callous-unemotional traits in adolescent offenders: Validation of the Inventory of Callous Unemotional Traits. Journal of the International Association of Psychiatry and Law, 31(3), 241-252.
Mason, O., Linney, Y., and Claridge, G. (2005). Short scales for measuring schizotypy. Schizophr Res, 78(2-3), 293-296
Ronald, A., Sieradzka, D., Cardno, A. G., Haworth, C. M. A, McGuire, P., Freeman, D. (2014). Characterization of psychotic experiences in adolescence using the Specific Psychotic Experiences Questionnaire (SPEQ): Findings from a study of 5000 16-year-old twins. Schizophrenia Bulletin, 40, 868-77.
Scott, F. J., Baron-Cohen, S., Bolton, P., & Brayne, C. (2002). The CAST (Childhood Asperger Syndrome Test) Preliminary development of a UK screen for mainstream primary-school-age children. Autism, 6(1), 9-31.
Silverman WK, Fleisig W, Rabian B, Peterson RA. Childhood anxiety sensitivity index. J Clin Child Psychol. 1991;20:162-168
Stice, E., Fisher, M. and Martinez, E. (2004) Eating Disorder Diagnostic Scale: Additional Evidence of Reliability and Validity. Psychological Assessment, 16 (1): 60-71
Swanson, J., Schuck, S., Mann, M., Carlson, C., Hartman, K., Sergeant, J. et al (2005). Categorical and dimensional definitions and evaluations of symptoms of ADHD: The SNAP and the SWAN Ratings Scales. The International journal of educational and psychological assessment, 10(1), 51.

## Sheet: ST2
Supplementary Table 2. Polygenic scores used in analyses and respective genome-wide association studies (GWAS)
GWAS study	GWAS N	Primary analysis
Attention deficit hyperactivity disorder (ADHD) (Demontis et al., 2023)	225534	x
Autism (Grove et al., 2019)	46350	x
Anorexia (Watson et al., 2019)	14477
Anxiety (Purves et al., 2019)	84217
Bipolar disorder (I and II) (Mullins et al., 2021)	413466
Birth weight (Horikoshi et al., 2016)	143677
Childhood intelligence (Benyamin et al., 2014)	15164	x
Cognitive ability (Howe et al., 2022)	27638	x
Cortical surface area (Grasby et al., 2020)	51665	x
Cortical average thickness (Grasby et al., 2020)	51665	x
Cross-disorder (Cross-Disorder Group of the Psychiatric Genomics Consortium, 2019)	727126
Cross-disorder mood spectrum (Coleman et al., 2020)	280214
Depression (Howard et al., 2019)	500199
Educational attainment (Howe et al., 2022)	123084	x
Externalizing factor (Karlsson Linnér et al., 2021)	1045957
Fluid intelligence score (UK Biobank, 2017)	108818	x
Intracranial volume (Hibar et a., 2015)	30717	x
Infant head circumference (Taal et al., 2012)	29857	x
Intelligence (Savage et al., 2018)	266453	x
Irritability (UK Biobank, 2017)	322668
Mean Caudate (Hibar et a., 2015)	30717	x
Mean Hippocampus (Hibar et a., 2015)	30717	x
Mean Pallidum (Hibar et a., 2015)	30717	x
Mean Putamen (Hibar et a., 2015)	30717	x
Mean Thalamus (Hibar et a., 2015)	30717	x
Mood swings (Neale lab, 2017)	329428
Neuroticism (Luciano et al., 2018)	329821
Obsessive Compulsive Disorder (OCD) (International Obsessive Compulsive Disorder Foundation Genetics Collaborative (IOCDF-GC) and OCD Collaborative Genetics Association Studies (OCGAS), 2018)	9725
Sensitivity (UK Biobank, 2017)	327832
Schizophrenia (Trubetskoy et al., 2022)	130644
Post-traumatic Stress Disorder (PTSD) (Nievergelt et al., 2019)	45526
Risk taking (UK Biobank, 2017)	325821
Tourette/tics (Yu et al., 2019)	14307	x
Wellbeing (Okbay et al., 2016)	298420
Years of Education (Lee et al., 2018)	766345	x
Note: 'x' in the last column indicates polygenic scores used in primary analyses, in line with our preregisterd study hypotheses
References
Benyamin, B., Pourcain, B., Davis, O. S., Davies, G., Hansell, N. K., Brion, M. J., Kirkpatrick, R. M., Cents, R. A., Franić, S., Miller, M. B., Haworth, C. M., Meaburn, E., Price, T. S., Evans, D. M., Timpson, N., Kemp, J., Ring, S., McArdle, W., Medland, S. E., Yang, J., … Visscher, P. M. (2014). Childhood intelligence is heritable, highly polygenic and associated with FNBP1L. Molecular psychia…
Coleman, J. R. I., Gaspar, H. A., Bryois, J., Bipolar Disorder Working Group of the Psychiatric Genomics Consortium, Major Depressive Disorder Working Group of the Psychiatric Genomics Consortium, & Breen, G. (2020). The Genetics of the Mood Disorder Spectrum: Genome-wide Association Analyses of More Than 185,000 Cases and 439,000 Controls. Biological psychiatry, 88(2), 169–184. https://doi.org/1…
Cross-Disorder Group of the Psychiatric Genomics Consortium. Genomic Relationships, Novel Loci, and Pleiotropic Mechanisms across Eight Psychiatric Disorders. Cell, 179(7), 1469–1482.e11. https://doi.org/10.1016/j.cell.2019.11.020
Demontis, D., Walters, G. B., Athanasiadis, G., Walters, R., Therrien, K., Nielsen, T. T., Farajzadeh, L., Voloudakis, G., Bendl, J., Zeng, B., Zhang, W., Grove, J., Als, T. D., Duan, J., Satterstrom, F. K., Bybjerg-Grauholm, J., Bækved-Hansen, M., Gudmundsson, O. O., Magnusson, S. H., Baldursson, G., … Børglum, A. D. (2023). Genome-wide analyses of ADHD identify 27 risk loci, refine the genetic …
Grasby, K. L., Jahanshad, N., Painter, J. N., Colodro-Conde, L., Bralten, J., Hibar, D. P., Lind, P. A., Pizzagalli, F., Ching, C. R. K., McMahon, M. A. B., Shatokhina, N., Zsembik, L. C. P., Thomopoulos, S. I., Zhu, A. H., Strike, L. T., Agartz, I., Alhusaini, S., Almeida, M. A. A., Alnæs, D., Amlien, I. K., … Enhancing NeuroImaging Genetics through Meta-Analysis Consortium (ENIGMA)—Genetics wor…
Grove, J., Ripke, S., Als, T. D., Mattheisen, M., Walters, R. K., Won, H., Pallesen, J., Agerbo, E., Andreassen, O. A., Anney, R., Awashti, S., Belliveau, R., Bettella, F., Buxbaum, J. D., Bybjerg-Grauholm, J., Bækvad-Hansen, M., Cerrato, F., Chambert, K., Christensen, J. H., Churchhouse, C., … Børglum, A. D. (2019). Identification of common genetic risk variants for autism spectrum disorder. Nat…
Hibar, D. P., Stein, J. L., Renteria, M. E., Arias-Vasquez, A., Desrivières, S., Jahanshad, N., Toro, R., Wittfeld, K., Abramovic, L., Andersson, M., Aribisala, B. S., Armstrong, N. J., Bernard, M., Bohlken, M. M., Boks, M. P., Bralten, J., Brown, A. A., Chakravarty, M. M., Chen, Q., Ching, C. R., … Medland, S. E. (2015). Common genetic variants influence human subcortical brain structures. Natur…
Horikoshi, M., Beaumont, R. N., Day, F. R., Warrington, N. M., Kooijman, M. N., Fernandez-Tajes, J., Feenstra, B., van Zuydam, N. R., Gaulton, K. J., Grarup, N., Bradfield, J. P., Strachan, D. P., Li-Gao, R., Ahluwalia, T. S., Kreiner, E., Rueedi, R., Lyytikäinen, L. P., Cousminer, D. L., Wu, Y., Thiering, E., … Freathy, R. M. (2016). Genome-wide associations for birth weight and correlations wit…
Howard, D. M., Adams, M. J., Clarke, T. K., Hafferty, J. D., Gibson, J., Shirali, M., Coleman, J. R. I., Hagenaars, S. P., Ward, J., Wigmore, E. M., Alloza, C., Shen, X., Barbu, M. C., Xu, E. Y., Whalley, H. C., Marioni, R. E., Porteous, D. J., Davies, G., Deary, I. J., Hemani, G., … McIntosh, A. M. (2019). Genome-wide meta-analysis of depression identifies 102 independent variants and highlights…
Howe, L. J., Nivard, M. G., Morris, T. T., Hansen, A. F., Rasheed, H., Cho, Y., Chittoor, G., Ahlskog, R., Lind, P. A., Palviainen, T., van der Zee, M. D., Cheesman, R., Mangino, M., Wang, Y., Li, S., Klaric, L., Ratliff, S. M., Bielak, L. F., Nygaard, M., Giannelis, A., … Davies, N. M. (2022). Within-sibship genome-wide association analyses decrease bias in estimates of direct genetic effects. N…
International Obsessive Compulsive Disorder Foundation Genetics Collaborative (IOCDF-GC) and OCD Collaborative Genetics Association Studies (OCGAS) (2018). Revealing the complex genetic architecture of obsessive-compulsive disorder using meta-analysis. Molecular psychiatry, 23(5), 1181–1188. https://doi.org/10.1038/mp.2017.154
Karlsson Linnér, R., Mallard, T. T., Barr, P. B., Sanchez-Roige, S., Madole, J. W., Driver, M. N., Poore, H. E., de Vlaming, R., Grotzinger, A. D., Tielbeek, J. J., Johnson, E. C., Liu, M., Rosenthal, S. B., Ideker, T., Zhou, H., Kember, R. L., Pasman, J. A., Verweij, K. J. H., Liu, D. J., Vrieze, S., … Dick, D. M. (2021). Multivariate analysis of 1.5 million people identifies genetic association…
Lee, J. J., Wedow, R., Okbay, A., Kong, E., Maghzian, O., Zacher, M., Nguyen-Viet, T. A., Bowers, P., Sidorenko, J., Karlsson Linnér, R., Fontana, M. A., Kundu, T., Lee, C., Li, H., Li, R., Royer, R., Timshel, P. N., Walters, R. K., Willoughby, E. A., Yengo, L., … Cesarini, D. (2018). Gene discovery and polygenic prediction from a genome-wide association study of educational attainment in 1.1 mil…
Luciano, M., Hagenaars, S. P., Davies, G., Hill, W. D., Clarke, T. K., Shirali, M., Harris, S. E., Marioni, R. E., Liewald, D. C., Fawns-Ritchie, C., Adams, M. J., Howard, D. M., Lewis, C. M., Gale, C. R., McIntosh, A. M., & Deary, I. J. (2018). Association analysis in over 329,000 individuals identifies 116 independent variants influencing neuroticism. Nature genetics, 50(1), 6–11. https://doi.o…
Nievergelt, C. M., Maihofer, A. X., Klengel, T., Atkinson, E. G., Chen, C. Y., Choi, K. W., Coleman, J. R. I., Dalvie, S., Duncan, L. E., Gelernter, J., Levey, D. F., Logue, M. W., Polimanti, R., Provost, A. C., Ratanatharathorn, A., Stein, M. B., Torres, K., Aiello, A. E., Almli, L. M., Amstadter, A. B., … Koenen, K. C. (2019). International meta-analysis of PTSD genome-wide association studies …
Purves, K. L., Coleman, J. R. I., Meier, S. M., Rayner, C., Davis, K. A. S., Cheesman, R., Bækvad-Hansen, M., Børglum, A. D., Wan Cho, S., Jürgen Deckert, J., Gaspar, H. A., Bybjerg-Grauholm, J., Hettema, J. M., Hotopf, M., Hougaard, D., Hübel, C., Kan, C., McIntosh, A. M., Mors, O., Bo Mortensen, P., … Eley, T. C. (2020). A major role for common genetic variation in anxiety disorders. Molecular …
Okbay, A., Baselmans, B. M., De Neve, J. E., Turley, P., Nivard, M. G., Fontana, M. A., Meddens, S. F., Linnér, R. K., Rietveld, C. A., Derringer, J., Gratten, J., Lee, J. J., Liu, J. Z., de Vlaming, R., Ahluwalia, T. S., Buchwald, J., Cavadino, A., Frazier-Wood, A. C., Furlotte, N. A., Garfield, V., … Cesarini, D. (2016). Genetic variants associated with subjective well-being, depressive symptom…
Savage, J. E., Jansen, P. R., Stringer, S., Watanabe, K., Bryois, J., de Leeuw, C. A., Nagel, M., Awasthi, S., Barr, P. B., Coleman, J. R. I., Grasby, K. L., Hammerschlag, A. R., Kaminski, J. A., Karlsson, R., Krapohl, E., Lam, M., Nygaard, M., Reynolds, C. A., Trampush, J. W., Young, H., … Posthuma, D. (2018). Genome-wide association meta-analysis in 269,867 individuals identifies new genetic an…
Taal, H. R., Pourcain, B. S., Thiering, E., Das, S., Mook-Kanamori, D. O., Warrington, N. M., Kaakinen, M., Kreiner-Møller, E., Bradfield, J. P., Freathy, R. M., Geller, F., Guxens, M., Cousminer, D. L., Kerkhof, M., Timpson, N. J., Ikram, M. A., Beilin, L. J., Bønnelykke, K., Buxton, J. L., Charoen, P., … Jaddoe, V. W. V. (2012). Common variants at 12q15 and 12q24 are associated with infant head…
Trubetskoy, V., Pardiñas, A. F., Qi, T., Panagiotaropoulou, G., Awasthi, S., Bigdeli, T. B., Bryois, J., Chen, C. Y., Dennison, C. A., Hall, L. S., Lam, M., Watanabe, K., Frei, O., Ge, T., Harwood, J. C., Koopmans, F., Magnusson, S., Richards, A. L., Sidorenko, J., Wu, Y., … Schizophrenia Working Group of the Psychiatric Genomics Consortium (2022). Mapping genomic loci implicates genes and synapt…
Yu, D., Sul, J. H., Tsetsos, F., Nawaz, M. S., Huang, A. Y., Zelaya, I., Illmann, C., Osiecki, L., Darrow, S. M., Hirschtritt, M. E., Greenberg, E., Muller-Vahl, K. R., Stuhrmann, M., Dion, Y., Rouleau, G., Aschauer, H., Stamenkovic, M., Schlögelhofer, M., Sandor, P., Barr, C. L., … Tourette Association of America International Consortium for Genetics, the Gilles de la Tourette GWAS Replication I…

## Sheet: ST3
Supplementary Table 3. Description of early envionmental and developmental predictors used in analyses, measured at 1st contact (around 18 months) and age 3 assessments
Measure	Description	1st Contact	Age 3
Gestational age	Gestation age for twins in weeks	x
Birth length	Length of twin at birth in cm	x
Birth weight	Weight of twin at birth in grams	x
Days in special care post birth	Number of days twin spent in special care when born	x
Days in hospital post birth	Number of days twin stayed in hospital after birth	x
Medical problems post birth	Twin had medical problems within two weeks of birth	x
Physical problems	Twin has physical problems	x
Genetic problems	Twin has genetic problems	x
Vision problems	Twin has vision problems	x
Vocabulary	Vocabulary total score based on how many words the child could say from a checklist of 100 common words (e.g., donkey, lemon), adapted from the MacArthur Communicative Development Inventory (MCDI) (Fenson et al., 1994)		x
Word use	Word use total score, based on 12 items on understanding and use of words (e.g., "Can your child name simple shapes with the words “circle”, “square” and “triangle”?"), adapted from the MacArthur Communicative Development Inventory (MCDI) (Fenson et al., 1994)		x
Sentence complexity	Sentence complexity total score, based on 12 items on correct use of words in a sentence (e.g., "why did he run away" rather than "why he run away"), adapted from the MacArthur Communicative Development Inventory (MCDI) (Fenson et al., 1994)		x
General cognitive ability	Overall cognitive ability (g) composite, based on standardisation of subtests of the Parent Report of Children’s Abilities (PARCA; Saudino et al., 1998), vocabulary and sentence complexity tests.		x
Health problems	Health problems, calculated as a composite score of 10 items covering any problems with coughs, asthma, fits, eyesight, skin, stomacaches, vomiting, headaches, diabetes, weakness/paralysis measured.		x
Note: The ‘x’ on the right-hand side indicates whether the measure was collected at 1st contact or during age 3 assessments
References
Fenson, L., Dale, P. S., Reznick, J. S., Bates, E., Thal, D., & Pethick, S. J. (1994). Variability in early communicative development. Monographs of the Society for Research in Child Development, 59, 1–173.
Saudino, K. J., Dale, P. S., Oliver, B., Petrill, S. A., Richardson, V., Rutter, M., et al. (1998). The validity of parent-based assessment of cognitive abilities of 2-year-olds. British Journal of Developmental Psychology, 16, 349-363.

## Sheet: ST4
Supplementary Table 4. Description of assessments used to measure cognitive and educational outcomes at age 7, 12 and 16
Measure	Description	Age 7 (P)	Age 7 (C)	Age 7 (T)	Age 12 (P)	Age 12 (C)	Age 12 (T)	Age 16 (P)	Age 16 (C)	Age 16 (T)
General cognitive ability (g)	Composite score of verbal and non-verbal tests. Age 7: Similarities subset and Vocabulary subset from the WISC-III-UK (Wechsler, 1992); Picture Completion subset from the WISC-III-UK (Wechsler, 1992) and Conceptual Grouping subset from the McCarthy Scales of Children's Abilities (McCarthy, 1972). Age 12: Information (General Knowledge) and Vocabulary Multiple Choice subtests from WISC-III-P (Wech…		x			x			x
Overall academic achievement	Composite scores for teacher grades in English and Maths at age 7 and 12. Composite score of resuts of standardised tests in English, Maths and Science (i.e., GCSEs)			x			x		x
Reading ability	Standardised score from the TOWRE (Torgesen et al., 1999), aggregating scores of Sight Word Efficiency ("Word" test) and Phonemic Decoding Efficiency ("Non-word" test)		x			x
Reading comprehension	Sentence-level reading comprehension assessed using a web-based version of the Reading Comprehension subtest of the PIAT (Markwardt et al., 1997).								x
Reading fluency	Online adaptation of the Woodcock-Johnson III Reading Fluency test (Woodcock et al., 2001)								x
Longest time off school	Report on the longest amount of time the child spent off school.	x
Behaviour relative to other pupils	Report on the child's behaviour relative to other students in the classroom.			x
Learning relative to other pupils	Report on the child's learning relative to other students in the classroom.			x
Effort relative to other pupils	Report on the child's effort relative to other students in the classroom.			x
Happiness relative to other pupils	Report on the child's happiness relative to other students in the classroom.			x
Referred for special education	Whether the child had a referral for special education support at the time of assessments.			x
SEN statement	Whether the child had a statement of SEN (a UK legal document describing a child's special needs) at the time of assessments.						x
Notes: The ‘x’ on the right-hand side indicates whether the measure was completed/collected at age 7, 12, or 16 by the parent (P), child (C) or teacher (T).
Abbreviations:
GCSE=General Certificate of Secondary Education (UK standardised secondary school tests taken at age 16 years)
PIAT=Peabody Individual Achievement Test
SEN=special education needs
TOWRE=Test of Word Reading Efficiency
WISC-III-UK=Wechsler Intelligence Scale for Children, 3rd edition UK version
References
Markwardt F. C., Jr. (1997). Peabody individual achievement test-revised (normative update) manual. Circle Pines, MN: American Guidance Service.
McCarthy, D. A. (1972). Manual for the McCarthy scales of children's abilities.
Raven J., Raven J. C. & Court J. H. Manual for Raven’s Progressive Matrices and Vocabulary Scales. (Harcourt Assessment, San Antonio, TX, 1988)
Raven J., Raven J. C. & Court J. H. Manual for Raven’s Progressive Matrices and Vocabulary Scales. (Harcourt Assessment, San Antonio, TX, 1998).
Torgesen, JK, Wagner, RK and Rashotte CA (1999): TOWRE (Test of Word Reading Efficiency); Austin, Texas: Pro-Ed
Wechsler, D (1992): Wechsler intelligence scale for children (3rd Ed. UK); The Psychological Corporation
Woodcock R. W., McGrew K. S., & Mather N. (2001). Woodcock-Johnson III. Itasca, IL: Riverside Publishing.

## Sheet: ST5
Supplementary Table 5. Factor loadings and factor correlations for models from 1 to 7 factors from the exploratory structural equation modelling analyse of parent-reported neurodevelopmental and other psychiatric traits at age 7.
		1-factor	2-factor		3-factor			4-factor				5-factor					6-factor						7-factor
Original measure	Item	p	Externalizing/ Neurodevelopmental	Internalizing	Externalizing	Neurodevelopmental	Internalizing	Neurodevelopmental	Externalizing	Low Prosociality	Internalizing	Neurodevelopmental	Externalizing	Low Prosociality	Distress/Social Difficulties	Fear	Neurodevelopmental	Externalizing	Low Prosociality	Fear	Distress	Social Difficulties/ Repetitive and restricted behaviors and interests	Learning Difficulties	Inattention-Hyperactivity	Low Prosociality	Antisociality	Fear	Social Difficulties/ Repetitive and restricted behaviors and interests	Distress
DX	Restless, has difficulties concentrating and finishing tasks	0.597	0.716	-0.017	0.281	0.569	0.133	0.681	0.224	0.049	0.127	0.649	0.294	0.024	0.288	0.014	0.7	0.294	0.031	0.018	0.038	-0.028	0.603	0.426	0.012	-0.079	0.01	0.079	0.024
DX	Composite: Diagnosed hyperactivity/ADHD	0.498	0.518	0.089	0.32	0.306	0.137	0.302	0.338	0.124	0.101	0.27	0.331	0.125	0.24	-0.021	0.349	0.316	0.143	-0.009	-0.042	0.171	0.242	0.31	0.161	0.029	-0.033	0.266	-0.003
DX	Difficulties in learning to read/dyslexia	0.417	0.545	-0.063	0.003	0.545	0.167	0.733	-0.015	-0.126	0.136	0.645	-0.027	-0.062	0.482	-0.085	0.74	-0.026	-0.054	-0.104	0.226	0.009	0.869	-0.029	-0.305	0.08	0.01	-0.056	-0.005
DX	Difficulties in learning to write	0.504	0.641	-0.061	-0.004	0.64	0.215	0.791	-0.013	-0.078	0.18	0.684	-0.039	0.009	0.585	-0.108	0.815	-0.042	0.017	-0.115	0.231	0.083	0.946	-0.046	-0.244	0.083	0.01	0.022	-0.033
DX	Composite: Diagnosed dyspraxia/difficulties in fine/gross motor skills/coordination	0.487	0.561	0.023	0.039	0.522	0.238	0.632	0.013	0.023	0.224	0.562	-0.005	0.085	0.499	-0.015	0.694	-0.011	0.088	0	0.113	0.149	0.697	0.15	0.03	-0.161	0.007	0.185	0.028
DX	Difficulties in maths	0.429	0.496	0.018	0.006	0.477	0.226	0.63	-0.014	-0.055	0.206	0.566	-0.004	-0.008	0.428	0.01	0.654	-0.003	-0.006	-0.001	0.182	0.028	0.742	0.036	-0.179	0.009	0.073	0.009	0.007
DX	Any other learning difficulty	0.272	0.296	0.04	0.065	0.251	0.132	0.308	0.048	0.046	0.127	0.294	0.069	0.049	0.189	0.047	0.343	0.068	0.049	0.053	0.029	0.035	0.34	0.123	0.013	-0.045	0.058	0.071	-0.011
DX	Difficulties with talking	0.248	0.292	0.014	0.01	0.287	0.133	0.321	0.003	0.071	0.126	0.299	-0.003	0.099	0.255	0.011	0.377	-0.009	0.099	0.026	0.03	0.091	0.394	0.061	0.046	-0.064	0.037	0.107	-0.032
DX	Repeated involuntary noises other than ordinary talking (e.g. grunts, throat clearing, or saying words or parts of words)	0.381	0.306	0.175	0.202	0.127	0.201	0.14	0.227	0.059	0.173	0.111	0.195	0.082	0.277	-0.002	0.207	0.181	0.09	0.004	0.034	0.215	0.145	0.161	0.114	0.013	-0.012	0.267	0.056
DX	Repeated tics or twitches (e.g. forceful eye blinking or a rapid head jerk)	0.225	0.18	0.105	0.1	0.084	0.13	0.079	0.118	0.053	0.114	0.063	0.086	0.074	0.194	-0.005	0.142	0.075	0.078	0.012	-0.014	0.183	0.051	0.142	0.144	-0.083	-0.017	0.229	0.029
SDQ	Restless, overactive, cannot stay still for long	0.64	0.687	0.078	0.725	0.217	-0.032	0.356	0.677	-0.063	-0.055	0.326	0.789	-0.171	-0.087	-0.003	0.327	0.768	-0.152	0.022	-0.287	0.06	-0.029	0.79	0.002	0.047	-0.023	0.252	-0.075
SDQ	Constantly fidgeting or squirming	0.643	0.661	0.11	0.669	0.209	0.022	0.352	0.625	-0.061	-0.001	0.32	0.733	-0.157	-0.054	0.035	0.329	0.708	-0.137	0.057	-0.252	0.072	-0.024	0.756	0.033	0.004	0.006	0.254	-0.035
SDQ	Easily distracted or concentration wanders	0.609	0.744	-0.04	0.515	0.467	-0.008	0.638	0.43	-0.037	-0.009	0.619	0.553	-0.127	0.044	0.021	0.588	0.56	-0.12	0.005	-0.034	-0.18	0.398	0.638	-0.093	0.015	-0.006	-0.022	0.025
SDQ	Thinks things out before acting (R)	0.291	0.573	-0.231	0.307	0.493	-0.162	0.376	0.274	0.268	-0.16	0.383	0.386	0.187	-0.152	-0.021	0.273	0.407	0.192	-0.038	-0.005	-0.351	0.197	0.341	0.152	0.205	-0.043	-0.281	0.008
SDQ	Sees tasks through to the end, good attention span (R)	0.507	0.758	-0.19	0.388	0.622	-0.086	0.694	0.29	0.12	-0.074	0.692	0.435	0.028	-0.03	0.03	0.618	0.453	0.03	0.016	-0.016	-0.334	0.447	0.583	0.047	-0.009	-0.006	-0.198	0.023
SDQ	Considerate of other people's feelings (R)	0.333	0.515	-0.108	0.147	0.483	0.029	-0.023	0.244	0.644	-0.002	-0.02	0.28	0.621	-0.052	0.027	-0.046	0.282	0.625	0.05	-0.065	-0.042	-0.036	0.028	0.544	0.368	0.043	-0.037	-0.083
SDQ	Shares readily with other children (such as treats, toys, pencils etc.) (R)	0.312	0.387	0	0.104	0.337	0.108	-0.032	0.188	0.477	0.079	-0.035	0.206	0.472	0.029	0.054	-0.043	0.208	0.477	0.059	0.017	-0.003	-0.029	0.001	0.423	0.284	0.051	-0.005	0.005
SDQ	Helpful if someone is hurt, upset or feeling ill (R)	0.18	0.402	-0.188	-0.122	0.555	0.043	-0.018	-0.029	0.723	0.032	-0.003	-0.009	0.732	-0.016	0.067	-0.008	-0.007	0.729	0.112	-0.078	-0.025	-0.058	-0.02	0.746	0.093	0.059	-0.03	-0.065
SDQ	Kind to younger children (R)	0.261	0.384	-0.065	-0.031	0.434	0.116	-0.031	0.068	0.582	0.092	-0.03	0.061	0.6	0.085	0.046	-0.017	0.061	0.603	0.064	0.028	0.024	-0.032	-0.038	0.599	0.161	0.021	0.014	0.038
SDQ	Often volunteers to help others such as parents, teachers, other children (R)	0.122	0.332	-0.19	-0.146	0.504	0.023	0.093	-0.091	0.561	0.023	0.111	-0.042	0.556	-0.045	0.092	0.086	-0.034	0.55	0.127	-0.062	-0.106	0.03	0.036	0.574	0.001	0.079	-0.102	-0.05
SDQ	Often has temper tantrums or hot tempers	0.573	0.437	0.291	0.4	0.095	0.266	-0.012	0.472	0.181	0.213	-0.04	0.525	0.144	0.072	0.125	-0.07	0.532	0.157	0.069	0.162	-0.021	0.017	0.068	0.01	0.554	0.12	-0.02	0.123
SDQ	Generally obedient or usually does what adults request (R)	0.466	0.595	-0.027	0.421	0.368	-0.006	0.124	0.466	0.372	-0.041	0.113	0.52	0.318	-0.039	-0.026	0.066	0.526	0.329	-0.039	-0.004	-0.105	0.062	0.205	0.225	0.448	-0.018	-0.06	-0.017
SDQ	Often fights with other children or bullies them	0.528	0.552	0.104	0.494	0.229	0.069	0.014	0.553	0.302	0.023	-0.015	0.531	0.286	0.132	-0.098	-0.013	0.526	0.307	-0.136	0.131	0.028	0.1	0.031	0.131	0.59	-0.089	0.038	0.066
SDQ	Often lies or cheats	0.499	0.464	0.163	0.476	0.125	0.101	-0.012	0.53	0.199	0.056	-0.036	0.563	0.153	0.015	0.002	-0.059	0.563	0.167	-0.032	0.054	0	0.088	0.032	-0.063	0.632	0.053	0.007	-0.045
SDQ	Steals from home, school or elsewhere	0.403	0.406	0.097	0.371	0.155	0.068	0.023	0.411	0.194	0.034	0.001	0.408	0.175	0.084	-0.048	0.004	0.404	0.189	-0.071	0.071	0.029	0.155	-0.028	-0.011	0.497	-0.005	0.028	-0.029
SDQ	Complains of stomach-aches, headaches or sickness	0.205	0.056	0.207	0.028	-0.035	0.222	0.003	0.055	-0.016	0.204	-0.003	0.109	-0.031	0.028	0.175	-0.041	0.121	-0.03	0.131	0.16	-0.082	-0.035	0.033	-0.026	0.106	0.133	-0.087	0.171
SDQ	Many worries or often seems worried	0.577	0.002	0.713	-0.082	-0.21	0.778	0.007	-0.002	-0.17	0.724	-0.026	0.034	-0.127	0.408	0.449	0.001	0.05	-0.115	0.344	0.501	0.072	-0.046	0.042	0.022	-0.047	0.302	0.067	0.57
SDQ	Often unhappy, downhearted or tearful	0.6	0.223	0.541	0.129	-0.048	0.582	0.03	0.206	-0.006	0.528	-0.007	0.205	0.03	0.389	0.259	0.027	0.213	0.049	0.165	0.44	0.075	0.054	0.013	0.071	0.19	0.144	0.069	0.463
SDQ	Nervous or clingy in new situations, easily loses confidence in new situations	0.542	-0.027	0.684	-0.398	0.01	0.872	0.045	-0.292	0.096	0.828	0.055	-0.018	0.039	-0.003	0.825	0.031	0.004	0.007	0.79	0.08	-0.023	0.099	-0.039	-0.044	0.03	0.812	-0.059	0.041
SDQ	Many fears or easily scared	0.502	0.069	0.565	-0.04	-0.109	0.631	0.041	0.023	-0.089	0.588	0.03	0.206	-0.142	0.03	0.549	-0.011	0.227	-0.152	0.492	0.163	-0.051	-0.13	0.247	-0.047	-0.012	0.488	-0.009	0.231
SDQ	Rather solitary or tends to play alone	0.418	0.181	0.353	0.014	0.049	0.433	0.038	0.081	0.086	0.395	0.002	-0.009	0.168	0.483	0.091	0.178	-0.034	0.176	0.094	0.134	0.403	0.22	-0.079	0.17	-0.028	0.076	0.408	0.106
SDQ	Has at least one good friend (R)	0.303	0.32	0.061	0.016	0.298	0.189	0.151	0.056	0.273	0.172	0.135	-0.005	0.324	0.326	-0.01	0.214	-0.013	0.333	-0.014	0.157	0.117	0.188	0.024	0.377	-0.041	-0.07	0.136	0.172
SDQ	Generally liked by other children (R)	0.427	0.391	0.149	0.014	0.342	0.312	0.122	0.086	0.374	0.283	0.094	0.008	0.45	0.428	0.031	0.193	-0.002	0.464	0.015	0.246	0.164	0.226	-0.071	0.467	0.067	-0.038	0.158	0.235
SDQ	Picked on or bullied by other children	0.461	0.234	0.355	0.122	0.036	0.399	0.129	0.163	-0.023	0.362	0.09	0.111	0.029	0.434	0.085	0.183	0.104	0.043	0.033	0.306	0.176	0.242	-0.02	0.018	0.093	0.026	0.175	0.282
SDQ	Gets on better with adults than with other children	0.493	0.237	0.397	0.204	-0.028	0.399	0.029	0.263	-0.011	0.353	-0.017	0.16	0.059	0.508	0.005	0.156	0.133	0.074	-0.009	0.171	0.418	0.185	-0.002	0.066	0.071	-0.02	0.444	0.162
ASD	Notices small details others might miss (R)	-0.008	0.239	-0.259	-0.058	0.383	-0.135	0.275	-0.091	0.222	-0.114	0.298	0.011	0.172	-0.175	0.053	0.192	0.031	0.169	0.047	0.004	-0.35	0.189	0.095	0.13	0.021	0.042	-0.343	-0.023
ASD	Has odd style of communication; oldfashioned, formal, or pedantic	0.392	0.152	0.354	0.262	-0.136	0.286	-0.033	0.306	-0.111	0.244	-0.074	0.214	-0.063	0.38	-0.035	0.081	0.189	-0.051	-0.035	0.058	0.409	0.056	0.08	-0.037	0.053	-0.031	0.453	0.072
ASD	Often says things that are embarrassing for others, without realising	0.492	0.383	0.24	0.506	-0.007	0.132	0.024	0.538	-0.011	0.087	-0.01	0.533	-0.037	0.131	-0.043	0.026	0.524	-0.022	-0.067	0.034	0.144	0.053	0.176	-0.13	0.396	-0.014	0.199	0.007
ASD	Has unusual eye gaze, facial expression, or gestures	0.529	0.312	0.364	0.314	-0.008	0.337	0.067	0.361	-0.03	0.29	0.025	0.302	0.004	0.392	0.014	0.184	0.277	0.015	0.023	0.018	0.408	0.157	0.148	0	0.093	0.034	0.472	0.016
ASD	Is extremely distressed by changes to routine or familiar arrangements	0.546	0.147	0.548	0.022	-0.061	0.613	0.001	0.107	0.004	0.562	-0.028	0.159	0.02	0.284	0.36	0.074	0.151	0.014	0.348	0.081	0.29	0.053	0.078	0.029	0.034	0.355	0.315	0.085
ASD	Enjoys 'pretend' games (R)	0.085	0.185	-0.082	-0.012	0.229	0	0.019	0.02	0.284	-0.004	0.019	-0.018	0.309	0.093	-0.05	0.057	-0.025	0.312	-0.025	-0.02	0.07	-0.01	0.038	0.378	-0.056	-0.078	0.093	0.021
ASD	Has a strong interest in an unusual topic	0.242	0.076	0.237	0.206	-0.139	0.165	-0.064	0.237	-0.104	0.136	-0.099	0.135	-0.054	0.309	-0.095	0.046	0.108	-0.044	-0.083	-0.001	0.389	0.045	0.016	-0.048	0.036	-0.074	0.416	-0.002
ASD	Can take hints and keep secrets, can be discreet (R)	0.285	0.408	-0.06	0.243	0.296	-0.021	0.21	0.243	0.186	-0.032	0.204	0.303	0.142	-0.028	0.001	0.178	0.307	0.145	0.003	-0.047	-0.091	0.14	0.215	0.094	0.173	0.017	-0.041	-0.058
PSYCH	Is concerned about how well he/she does at school (R)	-0.065	0.286	-0.38	0.007	0.438	-0.276	0.292	-0.04	0.257	-0.248	0.314	0.034	0.207	-0.19	-0.07	0.266	0.041	0.198	-0.021	-0.217	-0.202	0.266	0.12	0.116	-0.005	-0.006	-0.169	-0.275
PSYCH	His/her emotions seem shallow and not genuine	0.513	0.379	0.273	0.387	0.053	0.228	-0.072	0.458	0.175	0.178	-0.099	0.454	0.164	0.142	0.04	-0.082	0.449	0.179	0.001	0.131	0.1	-0.019	0.048	0.081	0.452	0.03	0.117	0.11
PSYCH	Brags about accomplishments	0.268	0.16	0.185	0.416	-0.163	0.029	-0.219	0.466	-0.001	-0.011	-0.243	0.433	-0.02	0.008	-0.09	-0.239	0.424	-0.005	-0.116	0.024	0.124	-0.155	-0.01	-0.129	0.473	-0.057	0.127	-0.006
PSYCH	Teases other people	0.364	0.362	0.095	0.42	0.079	0.02	-0.07	0.468	0.175	-0.017	-0.091	0.451	0.153	0.04	-0.088	-0.102	0.447	0.17	-0.118	0.071	0.027	0.02	-0.014	-0.005	0.537	-0.059	0.024	0.005
PSYCH	Feels bad or guilty when he/she does something wrong (R)	0.062	0.371	-0.306	0.151	0.406	-0.241	0.053	0.173	0.456	-0.243	0.066	0.195	0.421	-0.163	-0.127	0.029	0.195	0.422	-0.083	-0.19	-0.093	0.073	0.016	0.298	0.278	-0.062	-0.085	-0.246
PSYCH	Can turn on the charm to get what s/he wants	0.16	0.098	0.108	0.379	-0.175	-0.054	-0.075	0.377	-0.165	-0.075	-0.095	0.364	-0.197	-0.024	-0.11	-0.114	0.362	-0.185	-0.144	0.036	0.019	-0.036	0.038	-0.31	0.363	-0.079	0.026	-0.003
PSYCH	Becomes angry when corrected	0.479	0.305	0.308	0.312	0.009	0.276	-0.112	0.392	0.161	0.226	-0.139	0.399	0.153	0.129	0.094	-0.137	0.399	0.167	0.045	0.174	0.071	-0.034	-0.036	0.043	0.487	0.086	0.055	0.136
PSYCH	Thinks he/she is more important than others	0.432	0.34	0.211	0.461	-0.012	0.106	-0.259	0.558	0.237	0.048	-0.287	0.521	0.224	0.053	-0.066	-0.276	0.511	0.243	-0.091	0.051	0.151	-0.148	-0.067	0.071	0.644	-0.028	0.142	-0.005
PSYCH	Does not show feelings or emotions	0.239	0.124	0.182	0.091	0.006	0.19	-0.026	0.131	0.06	0.166	-0.042	0.11	0.079	0.162	0.048	0.053	0.093	0.081	0.072	-0.071	0.259	0.035	0.044	0.08	0.02	0.071	0.289	-0.067
ANX/DEP	Is afraid of small closed spaces, heights, water or the dark	0.357	0.062	0.394	-0.04	-0.054	0.453	0.032	0.009	-0.035	0.422	0.029	0.169	-0.086	-0.041	0.434	-0.012	0.185	-0.098	0.401	0.06	-0.056	-0.092	0.188	-0.045	0.015	0.41	-0.023	0.094
ANX/DEP	Takes a long time to warm to strangers	0.318	-0.093	0.486	-0.387	-0.009	0.649	-0.094	-0.284	0.174	0.617	-0.085	-0.087	0.145	-0.049	0.634	-0.053	-0.081	0.112	0.663	-0.149	0.155	-0.007	-0.087	0.073	-0.032	0.682	0.134	-0.188
ANX/DEP	Is afraid in social situations	0.537	-0.011	0.66	-0.429	0.061	0.862	0.01	-0.307	0.193	0.817	0.015	-0.068	0.162	0.052	0.776	0.025	-0.052	0.131	0.756	0.057	0.057	0.101	-0.093	0.085	0.016	0.764	0.02	0.013
ANX/DEP	Tends to check that some things are done exactly ‘right’	0.178	-0.262	0.496	0.093	-0.52	0.351	-0.422	0.176	-0.235	0.305	-0.462	0.043	-0.159	0.314	0.018	-0.279	0.01	-0.157	0.03	-0.014	0.599	-0.282	-0.125	-0.105	0.013	0.041	0.595	0.022
ANX/DEP	Asks for reassurance that s/he is OK	0.426	-0.021	0.562	0.047	-0.26	0.547	-0.027	0.098	-0.243	0.503	-0.057	0.125	-0.225	0.275	0.297	-0.037	0.135	-0.217	0.212	0.35	0.079	-0.011	0.005	-0.19	0.091	0.215	0.066	0.373
ANX/DEP	Insists on doing something over and over so that it interferes with day to day life	0.578	0.359	0.381	0.423	-0.036	0.312	0.001	0.483	-0.004	0.257	-0.042	0.449	0.006	0.297	0.021	0.093	0.423	0.021	0.03	-0.037	0.397	0.025	0.223	0.016	0.19	0.044	0.473	-0.007
ANX/DEP	Tends to be shy or timid	0.379	-0.14	0.593	-0.537	0.005	0.803	-0.027	-0.429	0.148	0.77	-0.012	-0.193	0.118	-0.006	0.772	0.005	-0.18	0.081	0.773	-0.026	0.075	0.086	-0.145	0.039	-0.083	0.786	0.028	-0.079
ANX/DEP	Is afraid of medical procedures such as going to see the doctor or dentist	0.29	0.038	0.333	-0.078	-0.032	0.399	0.007	-0.029	0.01	0.373	0.005	0.104	-0.027	-0.025	0.377	-0.011	0.113	-0.039	0.361	0.013	0.001	-0.047	0.099	-0.022	0.02	0.373	0.017	0.024
ANX/DEP	Doesn’t enjoy him/herself	0.459	0.23	0.357	0.138	0.021	0.39	0.033	0.198	0.052	0.35	0.004	0.169	0.088	0.334	0.122	0.07	0.165	0.102	0.074	0.255	0.152	0.071	0.033	0.123	0.117	0.052	0.164	0.275
ANX/DEP	Often makes comments critical of him/herself	0.418	0.001	0.524	0.032	-0.216	0.525	0.066	0.067	-0.275	0.483	0.026	0.004	-0.203	0.488	0.163	0.032	0.023	-0.175	0.015	0.683	-0.039	0.027	-0.018	-0.048	-0.005	-0.047	-0.069	0.758
ANX/DEP	Complains or whines a lot	0.522	0.345	0.322	0.337	0.029	0.293	-0.019	0.399	0.107	0.246	-0.04	0.472	0.064	0.036	0.184	-0.088	0.485	0.073	0.122	0.174	-0.06	-0.071	0.135	0.01	0.423	0.147	-0.041	0.184
ANX/DEP	Has low self-confidence	0.552	0.138	0.553	-0.148	0.04	0.702	0.22	-0.097	-0.059	0.664	0.194	-0.047	-0.014	0.425	0.426	0.209	-0.03	-0.001	0.329	0.534	-0.063	0.251	-0.027	0.044	-0.031	0.292	-0.096	0.539
ANX/DEP	Fussy or over particular	0.425	-0.029	0.573	0.195	-0.367	0.473	-0.306	0.293	-0.125	0.414	-0.348	0.221	-0.075	0.319	0.131	-0.188	0.197	-0.071	0.131	0.029	0.516	-0.208	-0.004	-0.041	0.126	0.146	0.534	0.062
ANX/DEP	Tends to blame him/herself	0.433	-0.055	0.595	0.016	-0.291	0.585	0.032	0.054	-0.332	0.539	-0.014	-0.034	-0.243	0.561	0.167	0.02	-0.018	-0.211	0.024	0.692	0.049	0.011	-0.037	-0.065	-0.054	-0.04	0.024	0.767
ANX/DEP	Is often extremely upset or distressed when parent leaves	0.478	0.089	0.518	0.007	-0.099	0.566	0.01	0.074	-0.058	0.522	-0.009	0.183	-0.078	0.136	0.411	0.018	0.188	-0.085	0.375	0.113	0.11	0.038	0.062	-0.112	0.113	0.4	0.12	0.1
ANX/DEP	Seems keyed up, on edge or tense	0.689	0.288	0.587	0.133	0.003	0.652	0.023	0.231	0.076	0.591	-0.014	0.263	0.101	0.365	0.336	0.046	0.264	0.112	0.271	0.312	0.166	0.041	0.069	0.134	0.188	0.254	0.176	0.341
ANX/DEP	Is afraid of animals or insects (like dogs, spiders, snakes, or insects)	0.184	-0.022	0.26	-0.085	-0.064	0.303	-0.028	-0.048	-0.011	0.286	-0.025	0.073	-0.049	-0.081	0.325	-0.056	0.084	-0.062	0.313	-0.011	-0.03	-0.112	0.103	-0.02	-0.014	0.319	-0.013	0.016
ANX/DEP	Anxious that bad things will happen	0.51	0.013	0.625	-0.009	-0.212	0.655	-0.02	0.06	-0.165	0.605	-0.045	0.131	-0.158	0.253	0.417	-0.058	0.151	-0.15	0.321	0.402	0.002	-0.104	0.088	-0.05	0.041	0.3	0.006	0.463
ANX/DEP	Strongly refuses or resists sleeping alone	0.315	0.12	0.284	0.083	-0.031	0.298	0.045	0.114	-0.039	0.272	0.037	0.231	-0.087	-0.037	0.279	0.01	0.24	-0.093	0.257	0.012	-0.024	-0.053	0.191	-0.077	0.076	0.275	0.014	0.035
ANX/DEP	Fussy about keeping his/her hands clean	0.217	-0.139	0.421	0.057	-0.336	0.344	-0.228	0.116	-0.177	0.308	-0.257	0.045	-0.126	0.266	0.086	-0.095	0.017	-0.13	0.108	-0.055	0.48	-0.15	0.011	-0.057	-0.092	0.107	0.509	-0.015
ADHD	Has difficulty completing one activity before changing to another	0.624	0.706	0.03	0.504	0.409	0.054	0.545	0.442	-0.009	0.045	0.523	0.556	-0.09	0.062	0.048	0.499	0.562	-0.082	0.026	-0.004	-0.14	0.341	0.566	-0.072	0.085	0.021	-0.001	0.046
ADHD	Has difficulty waiting for things	0.587	0.504	0.234	0.495	0.126	0.182	0.097	0.537	0.106	0.135	0.07	0.629	0.036	-0.017	0.112	0.039	0.633	0.044	0.081	0.005	-0.02	0.012	0.295	-0.046	0.437	0.126	0.046	0.008
	Factor correlations	F1	F1	F2	F1	F2	F3	F1	F2	F3	F4	F1	F2	F3	F4	F5	F1	F2	F3	F4	F5	F6	F1	F2	F3	F4	F5	F6	F7
	F1	1	1	0.269	1	0.138	0.465	1	0.14	0.159	0.11	1	-0.022	0.181	-0.03	-0.086	1	0.148	0.178	0.083	0.11	0.09	1	0.249	0.291	0.207	0.123	0.149	0.148
	F2			1		1	0.242		1	0.074	0.397		1	0.114	0.394	0.232		1	0.126	0.215	0.346	0.297		1	0.1	0.426	0.083	0.132	0.191
	F3						1			1	0.079			1	0.019	0.005			1	0.028	0.046	-0.004			1	0.18	0.071	-0.022	-0.063
	F4										1				1	0.368				1	0.337	0.284				1	0.178	0.331	0.254
	F5															1					1	0.386					1	0.315	0.402
	F6																					1						1	0.447
	F7																												1
	Fit indices	1-factor	2-factor		3-factor			4-factor				5-factor					6-factor						7-factor
	CFI	0.487	0.722		0.8			0.877				0.905					0.926						0.941
	TLI	0.473	0.706		0.782			0.862				0.891					0.913						0.927
	RMSEA	0.056	0.042		0.036			0.029				0.026					0.023						0.021
	SRMR	0.099	0.071		0.06			0.046				0.04					0.036						0.032
Notes: Bold indicates primary loadings (≥0.35) with at least │0.10│ difference from the second largest loading in the same factor structure.
All items were scored in the direction of difficulties or reversed-coded where necessary, so that higher scores reflected more severe difficulties.
Abbreviations:
(R)=reversed item
ADHD=DSM-IV ADHD symptoms
ANX/DEP=DSM-IV criteria for anxiety disorders and depression
ASD=DSM-IV criteria for Asperger’s/autism
CFI=comparative fit index. Adequate when ≥0.90
DX=Reports on neurodevelopmental diagnoses
PSYCH=Psychopathy
RMSEA=root mean square error of approximation. Adequate when ≤0.08
SDQ=Strenghts and Difficulties Questionnaire
SRMR=standardized root mean square residual. Adequate when ≤0.08
TFI=Tucker-Lewis index. Adequate when ≥0.90

## Sheet: ST6
Supplementary Table 6. Factor loadings for models from 1 to 6 factors from the exploratory structural equation modelling analyses of parent-reported neurodevelopmental and other psychiatric traits at age 12.
		1-factor	2-factor		3-factor			4-factor				5-factor					6-factor
Original measure	Item	p	Neurodevelopmental/Externalizing	Internalizing	Neurodevelopmental	Social Difficulties/ Externalizing	Internalizing	Inattention	Neurodevelopmental/Externalizing	Internalizing	Social Difficulties/ Low Prosociality	Social Difficulties	Inattention	Hyeractivity/ Repetitive and restricted behaviors and interests	Internalizing	Antisociality	Social Difficulties/ Repetitive and restricted behaviors and interests	Inattention	Antisociality	Internalizing	Hyeractivity	Low Prosociality
CAST	Does s/he join in playing games with other children easily? (R)	0.477	0.099	0.545	-0.058	0.413	0.393	0.068	-0.079	0.492	0.416	0.663	0.028	0.054	0.269	-0.106	0.684	0.038	-0.131	0.186	-0.006	0.138
CAST	Does s/he come up to you spontaneously for chat? (R)	0.36	0.178	0.28	-0.044	0.503	0.072	0.037	0.046	0.166	0.465	0.534	0.026	-0.096	0.046	0.135	0.366	-0.02	0.017	0.06	0.051	0.384
CAST	It is important to him/her to fit in with the peer group? (R)	0.121	0.063	0.091	-0.072	0.281	-0.015	0.073	-0.145	0.064	0.345	0.584	0.02	0.056	-0.155	-0.208	0.65	0.079	-0.177	-0.274	-0.093	0.029
CAST	Does s/he appear to notice unusual details that others miss?	0.077	-0.071	0.21	-0.028	-0.079	0.269	-0.192	0.238	0.201	-0.207	0.099	-0.291	0.443	0.05	-0.044	0.364	-0.25	0.116	-0.041	0.097	-0.368
CAST	Does s/he tend to take things literally?	0.343	0.181	0.25	0.212	-0.008	0.253	0.111	0.154	0.256	-0.076	0.085	0.063	0.254	0.18	0.002	0.194	0.034	0.055	0.152	0.164	-0.122
CAST	Does s/he like to do things over and over again, in the same way all the time?	0.354	0.146	0.313	0.131	0.08	0.296	0.005	0.225	0.291	-0.028	0.269	-0.084	0.382	0.123	-0.015	0.398	-0.131	0.042	0.093	0.251	-0.112
CAST	Does s/he find it easy to interact with other children? (R)	0.438	0.095	0.497	-0.065	0.406	0.348	0.037	-0.032	0.433	0.386	0.633	-0.012	0.085	0.214	-0.075	0.654	-0.009	-0.097	0.14	0.024	0.129
CAST	Can s/he keep a two way conversation going? (R)	0.443	0.254	0.296	0.092	0.397	0.13	0.17	0.005	0.228	0.392	0.6	0.123	0.088	0.02	-0.045	0.541	0.06	-0.113	0.001	0.164	0.246
CAST	Does s/he mostly have the same interests as his/her peers?	0.316	0.091	0.333	-0.005	0.246	0.249	0.018	0.042	0.295	0.21	0.479	-0.049	0.196	0.096	-0.085	0.586	-0.02	-0.035	0	0.021	-0.045
CAST	Does s/he have an interest which takes up so much time that s/he does little else?	0.334	0.21	0.199	0.144	0.176	0.13	0.06	0.199	0.149	0.089	0.251	0.007	0.213	0.036	0.079	0.306	-0.012	0.112	0.001	0.125	-0.011
CAST	Does s/he have friends, rather than just acquaintances? (R)	0.403	0.134	0.397	-0.014	0.375	0.252	0.08	-0.03	0.337	0.367	0.571	0.039	0.059	0.147	-0.058	0.645	0.104	-0.026	0.019	-0.108	0.027
CAST	Does s/he often bring you things s/he is interested in to show you? (R)	0.181	0.134	0.08	-0.057	0.414	-0.102	0.061	-0.041	-0.012	0.429	0.329	0.098	-0.281	-0.02	0.159	0.098	0.068	0.016	0.017	-0.058	0.423
CAST	Does s/he enjoy joking around? (R)	0.138	-0.121	0.363	-0.263	0.327	0.255	-0.204	0.017	0.289	0.274	0.412	-0.224	-0.025	0.168	0.045	0.351	-0.235	-0.022	0.164	0.003	0.193
CAST	Does s/he have difficulty understanding the rules for polite behaviour?	0.573	0.418	0.262	0.285	0.35	0.105	0.123	0.401	0.139	0.174	0.27	0.073	0.213	0.056	0.317	0.276	0.046	0.34	0.026	0.141	0.077
CAST	Does s/he appear to have an unusual memory for details?	0.178	0.029	0.22	0.033	0.009	0.239	-0.119	0.25	0.195	-0.114	0.202	-0.22	0.431	0.021	-0.022	0.435	-0.19	0.119	-0.072	0.116	-0.294
CAST	Is his/her voice unusual ( e.g. overly adult, flat or very monotonous)?	0.356	0.189	0.26	0.124	0.18	0.193	0.029	0.217	0.207	0.079	0.301	-0.04	0.278	0.057	0.054	0.403	-0.047	0.11	-0.001	0.13	-0.067
CAST	Are people important to him/her? (R)	0.374	0.241	0.217	-0.014	0.575	-0.033	0.07	0.069	0.073	0.539	0.65	0.037	-0.048	-0.102	0.132	0.557	0.054	0.081	-0.168	-0.056	0.294
CAST	Is s/he good at turn-taking in conversation? (R)	0.557	0.449	0.196	0.363	0.246	0.08	0.196	0.371	0.107	0.096	0.208	0.139	0.262	0.025	0.246	0.243	0.094	0.281	-0.001	0.199	0.023
CAST	Does s/he play imaginatively with other children, and engage in role-play? (R)	0.25	0.138	0.176	-0.055	0.428	0.001	-0.032	0.122	0.059	0.362	0.436	-0.056	-0.024	-0.05	0.163	0.339	-0.069	0.103	-0.065	0.014	0.252
CAST	Does s/he often do or say things that are tactless or socially inappropriate?	0.617	0.484	0.236	0.377	0.299	0.097	0.166	0.467	0.118	0.096	0.192	0.107	0.286	0.047	0.341	0.263	0.099	0.411	-0.011	0.137	-0.035
CAST	Does s/he make normal eye contact? (R)	0.521	0.318	0.322	0.174	0.37	0.166	0.204	0.073	0.257	0.343	0.55	0.151	0.133	0.067	0.004	0.524	0.101	-0.032	0.034	0.154	0.188
CAST	Does s/he have any unusual or repetitive movement?	0.43	0.291	0.228	0.26	0.105	0.194	0.161	0.19	0.216	0.035	0.296	0.081	0.327	0.056	-0.018	0.355	0.003	0.002	0.055	0.293	0.002
CAST	Is his/her social behaviour very one sided or always on his/her own terms?	0.691	0.428	0.42	0.251	0.466	0.219	0.048	0.509	0.255	0.219	0.342	-0.012	0.252	0.153	0.422	0.38	-0.011	0.467	0.091	0.097	0.049
CAST	Does she/he sometimes say ‘you’ or ‘s/he’ when s/he means ‘I’?	0.426	0.283	0.232	0.261	0.099	0.192	0.112	0.28	0.195	-0.021	0.167	0.046	0.33	0.084	0.088	0.287	0.022	0.161	0.039	0.187	-0.12
CAST	Does s/he prefer imaginative activities such as play-acting or story-telling, rather than numbers or list of facts? (R)	-0.068	-0.045	-0.035	-0.174	0.235	-0.117	-0.193	0.132	-0.127	0.165	0.21	-0.217	0.004	-0.185	0.14	0.138	-0.222	0.107	-0.171	0.01	0.146
CAST	Does s/he sometimes lose the listener because of not explaining what s/he is talking about?	0.464	0.399	0.127	0.41	0.037	0.092	0.358	0.086	0.147	0.03	0.118	0.327	0.169	0.091	-0.011	0.208	0.313	0.042	0.031	0.101	-0.081
CAST	Does s/he try to impose routines on him/herself or on others, in such a way that it causes problems?	0.487	0.173	0.466	0.107	0.214	0.393	-0.079	0.377	0.388	0.012	0.239	-0.153	0.342	0.264	0.197	0.345	-0.178	0.253	0.232	0.185	-0.078
CAST	Does s/he care how s/he is perceived by the rest of the group? (R)	0.168	0.215	-0.049	0.047	0.345	-0.2	0.124	0.004	-0.126	0.362	0.51	0.073	0.048	-0.303	-0.023	0.516	0.115	-0.001	-0.4	-0.058	0.1
CAST	Does s/he often turn conversations to his/her favourite subject rather than following what the other person wants to talk about?	0.564	0.44	0.219	0.38	0.193	0.128	0.154	0.449	0.132	0	0.124	0.088	0.341	0.061	0.278	0.234	0.072	0.364	0.006	0.176	-0.108
CAST	Does s/he have odd or unusual phrases?	0.474	0.303	0.275	0.268	0.129	0.227	0.096	0.327	0.228	-0.014	0.229	0.012	0.395	0.081	0.096	0.378	-0.007	0.187	0.021	0.205	-0.149
CPRS	Is always “on the go” or acts as if driven by a motor	0.41	0.476	-0.069	0.536	-0.146	0	0.173	0.542	-0.08	-0.334	-0.12	0.061	0.591	-0.151	0.185	-0.041	-0.098	0.258	-0.062	0.562	-0.124
CPRS	Avoids, expresses reluctance about, or has difficulties engaging in tasks that require sustained mental effort (such as schoolwork or homework)	0.714	0.761	-0.038	0.798	-0.01	-0.09	0.774	-0.048	0.059	0.108	0.013	0.789	-0.006	0.094	-0.023	0.018	0.751	-0.01	0.047	0.079	0.032
CPRS	Has difficulties sustaining attention in tasks or play activities	0.762	0.781	0.009	0.809	0.008	-0.042	0.743	0.044	0.088	0.078	0.075	0.73	0.119	0.076	-0.013	0.109	0.671	0.013	0.034	0.174	0.007
CPRS	Does not seem to listen to what is being said to him/her	0.723	0.698	0.08	0.677	0.124	-0.013	0.564	0.21	0.077	0.091	0.075	0.547	0.144	0.071	0.156	0.112	0.511	0.199	0.02	0.133	-0.001
CPRS	Runs about or climbs excessively in situations where it is inappropriate	0.706	0.729	0.006	0.711	0.079	-0.047	0.43	0.496	-0.041	-0.078	0.031	0.354	0.415	-0.089	0.27	0.042	0.225	0.31	-0.043	0.434	0.024
CPRS	Does not follow through on instructions and fails to finish schoolwork or chores	0.734	0.767	-0.013	0.772	0.07	-0.102	0.732	0.014	0.047	0.158	0.02	0.756	-0.042	0.098	0.074	0.045	0.762	0.112	0.013	-0.029	0.004
CPRS	Has difficulty organising tasks and activities	0.687	0.708	0.007	0.727	0.035	-0.06	0.751	-0.116	0.1	0.177	0.107	0.769	-0.055	0.112	-0.067	0.109	0.75	-0.059	0.047	0.016	0.054
CPRS	Talks excessively	0.503	0.474	0.077	0.53	-0.094	0.115	0.205	0.502	0.064	-0.29	-0.101	0.109	0.547	0.002	0.182	0.086	0.04	0.314	-0.014	0.371	-0.276
CPRS	Fails to give close attention to details or makes careless mistakes in schoolwork or other activities	0.662	0.735	-0.075	0.771	-0.015	-0.122	0.721	0.03	-0.006	0.059	-0.039	0.728	0.044	0.036	0.026	-0.014	0.695	0.06	-0.011	0.091	-0.011
CPRS	Has difficulty waiting in lines or awaiting turn in games or a group situation	0.762	0.713	0.119	0.662	0.181	0.017	0.398	0.512	0.038	-0.005	0.082	0.33	0.375	-0.009	0.326	0.141	0.254	0.39	-0.026	0.313	-0.029
CPRS	Interrupts or intrudes on others (e.g., butts into others conversations or games)	0.664	0.601	0.136	0.567	0.134	0.062	0.254	0.579	0.045	-0.102	-0.021	0.184	0.423	0.015	0.369	0.105	0.144	0.479	-0.026	0.26	-0.157
CPRS	Forgetful in daily activities	0.644	0.674	-0.007	0.709	-0.006	-0.053	0.698	-0.046	0.076	0.094	0.045	0.704	0.024	0.088	-0.047	0.113	0.703	0.005	0.001	0.01	-0.058
CPRS	Fidgets with hands or feet or squirms in seat	0.749	0.859	-0.162	0.929	-0.309	0.044	0.568	0.445	0.003	-0.373	0.046	0.418	0.681	-0.129	-0.042	-0.015	0.143	-0.036	0.099	0.805	0.125
CPRS	Has difficulty playing or engaging in leisure activities quietly	0.718	0.709	0.056	0.694	0.081	0.002	0.424	0.48	0.013	-0.078	0.022	0.354	0.401	-0.029	0.265	0.047	0.234	0.308	0.007	0.41	0.003
CPRS	Loses things necessary for tasks or activities (e.g., school assignments, pencils, books or toys)	0.627	0.678	-0.039	0.712	-0.011	-0.084	0.673	0.014	0.028	0.062	-0.034	0.686	0.022	0.071	0.022	0.008	0.676	0.069	0.008	0.029	-0.04
CPRS	Leaves seat in classroom or in other situations in which remaining in seat is expected	0.772	0.778	0.03	0.768	0.076	-0.031	0.538	0.412	0.006	-0.044	0.029	0.478	0.358	-0.029	0.222	0.072	0.377	0.275	-0.024	0.357	-0.018
CPRS	Easily distracted by extraneous stimuli	0.765	0.833	-0.072	0.873	-0.041	-0.097	0.726	0.213	-0.019	-0.052	-0.056	0.693	0.254	-0.014	0.08	-0.004	0.604	0.131	-0.026	0.293	-0.05
CPRS	Blurts out answers to questions before the questions have been completed	0.596	0.578	0.065	0.583	0.031	0.04	0.277	0.528	0.012	-0.175	-0.074	0.203	0.452	-0.019	0.285	0.076	0.158	0.407	-0.055	0.285	-0.21
SDQ	Considerate of other people's feelings (R)	0.524	0.447	0.152	0.104	0.741	-0.177	0.016	0.441	-0.098	0.538	0.38	0.037	-0.167	-0.086	0.626	0.079	-0.012	0.488	-0.028	0.029	0.532
SDQ	Shares readily with other children (food, games, pens etc.) (R)	0.381	0.276	0.179	0.025	0.548	-0.055	-0.028	0.302	0.003	0.4	0.317	-0.017	-0.117	-0.005	0.432	0.104	-0.054	0.323	0.037	0.026	0.392
SDQ	Helpful if someone is hurt, upset or feeling ill (R)	0.343	0.331	0.05	-0.039	0.748	-0.275	-0.026	0.273	-0.182	0.621	0.457	0.004	-0.287	-0.182	0.515	0.069	-0.072	0.301	-0.081	0.041	0.667
SDQ	Kind to younger children (R)	0.282	0.232	0.095	-0.083	0.642	-0.173	-0.057	0.207	-0.092	0.536	0.405	-0.028	-0.26	-0.096	0.422	0.084	-0.085	0.238	-0.018	0.011	0.559
SDQ	Often volunteers to help others (parents, teachers children) (R)	0.251	0.305	-0.052	0.068	0.499	-0.282	0.152	0.047	-0.179	0.5	0.323	0.197	-0.32	-0.154	0.284	-0.018	0.125	0.084	-0.064	0.028	0.579
SDQ	Restless, overactive, cannot stay still for long	0.714	0.806	-0.116	0.861	-0.184	-0.008	0.454	0.574	-0.06	-0.326	-0.041	0.322	0.659	-0.152	0.157	-0.061	0.078	0.19	0.02	0.746	0.047
SDQ	Constantly fidgeting or squirming	0.787	0.914	-0.198	0.991	-0.355	0.041	0.564	0.521	-0.018	-0.436	0.026	0.391	0.759	-0.159	-0.017	-0.079	0.061	-0.026	0.132	0.93	0.182
SDQ	Easily distracted, concentration wanders	0.773	0.826	-0.048	0.874	-0.051	-0.072	0.77	0.116	0.031	-0.015	-0.015	0.747	0.199	0.031	0.008	0.011	0.654	0.037	0.026	0.279	-0.004
SDQ	Thinks things out before acting (R)	0.554	0.594	-0.017	0.504	0.25	-0.164	0.428	0.217	-0.083	0.204	0.09	0.436	-0.009	-0.051	0.266	-0.02	0.385	0.232	-0.039	0.104	0.205
SDQ	Sees tasks through to the end, good attention span (R)	0.628	0.692	-0.06	0.686	0.077	-0.145	0.681	-0.021	-0.011	0.174	0.072	0.697	-0.048	0.018	0.031	-0.007	0.638	-0.007	0.016	0.113	0.163
SDQ	Often complains of headaches, stomach aches or sickness	0.285	0.027	0.373	0.082	-0.036	0.388	0.023	0.068	0.389	-0.09	-0.046	0.028	0.083	0.391	0.03	-0.001	0.007	0.039	0.398	0.071	-0.058
SDQ	Many worries, often seems worried	0.419	-0.071	0.672	0.03	-0.075	0.703	0.026	-0.057	0.721	-0.092	0.062	0.026	0.103	0.671	-0.121	0.134	-0.015	-0.133	0.676	0.116	-0.06
SDQ	Often unhappy, downhearted or tearful	0.532	-0.024	0.745	0.012	0.08	0.71	-0.028	0.067	0.732	-0.003	0.079	-0.008	0.043	0.704	0.067	0.126	-0.01	0.063	0.686	0.01	-0.022
SDQ	Nervous or clingy in new situations, easily loses confidence	0.335	0.045	0.419	0.07	0.032	0.409	0.085	-0.037	0.445	0.03	0.139	0.081	0.052	0.393	-0.068	0.117	0.009	-0.125	0.43	0.16	0.092
SDQ	Many fears easily scared	0.42	0.039	0.542	0.115	-0.047	0.56	0.074	0.024	0.575	-0.085	0.074	0.058	0.16	0.518	-0.075	0.121	-0.014	-0.091	0.544	0.202	-0.021
SDQ	Often has temper tantrums or hot tempers	0.56	0.337	0.354	0.263	0.242	0.247	0.041	0.462	0.249	0.011	-0.05	0.047	0.14	0.288	0.438	-0.082	0.009	0.449	0.315	0.127	0.06
SDQ	Generally obedient, usually does what adults request (R)	0.521	0.45	0.141	0.285	0.407	-0.053	0.13	0.424	-0.017	0.224	0.102	0.139	0.01	0.02	0.484	-0.046	0.09	0.435	0.061	0.103	0.257
SDQ	Often fights with other children and bullies them	0.637	0.471	0.283	0.299	0.443	0.078	0.048	0.596	0.094	0.149	0.084	0.04	0.149	0.113	0.577	0.072	0.054	0.618	0.08	0.032	0.062
SDQ	Often lies or cheats	0.638	0.472	0.284	0.279	0.492	0.05	0.019	0.647	0.063	0.152	-0.059	0.067	0.042	0.167	0.687	-0.043	0.153	0.751	0.093	-0.149	-0.005
SDQ	Steals from home, school or else where	0.555	0.407	0.25	0.245	0.414	0.055	0.023	0.546	0.068	0.13	-0.006	0.052	0.064	0.135	0.56	0.005	0.113	0.61	0.079	-0.092	0.011
SDQ	Rather solitary, tends to play alone	0.392	0.07	0.47	-0.033	0.289	0.368	0.037	-0.034	0.441	0.276	0.501	0	0.073	0.273	-0.08	0.577	0.044	-0.058	0.173	-0.066	0.015
SDQ	Has at least one good friend (R)	0.456	0.174	0.42	0.009	0.419	0.254	0.078	0.026	0.342	0.388	0.516	0.057	-0.016	0.206	0.062	0.526	0.112	0.063	0.105	-0.121	0.111
SDQ	Generally liked by other children (R)	0.511	0.222	0.437	0.042	0.454	0.256	0.075	0.1	0.342	0.39	0.508	0.053	-0.004	0.216	0.136	0.481	0.079	0.115	0.144	-0.059	0.171
SDQ	Picked on or bullied by other children	0.49	0.165	0.479	0.175	0.083	0.443	0.135	0.074	0.482	0.032	0.162	0.118	0.135	0.417	0.004	0.287	0.151	0.066	0.338	-0.016	-0.128
SDQ	Gets on better with adults than with other children	0.391	0.084	0.447	0.054	0.134	0.409	-0.021	0.158	0.422	0.037	0.291	-0.087	0.28	0.275	-0.007	0.489	-0.029	0.103	0.161	-0.003	-0.219
SMFQ	S/he didn’t enjoy anything at all	0.494	0.092	0.565	0.031	0.237	0.475	-0.021	0.157	0.512	0.126	0.149	-0.001	-0.008	0.491	0.202	0.137	0.007	0.184	0.47	-0.028	0.078
SMFQ	S/he felt so tired that s/he just sat around and did nothing	0.309	-0.005	0.44	-0.016	0.11	0.398	-0.005	0.003	0.43	0.075	0.089	0.02	-0.052	0.423	0.055	0.115	0.055	0.056	0.384	-0.1	-0.002
SMFQ	S/he felt s/he was no good anymore	0.626	-0.054	0.846	0.048	-0.011	0.821	0.045	-0.035	0.848	-0.044	-0.02	0.102	-0.042	0.836	0.025	0.01	0.095	0.002	0.826	-0.014	-0.01
SMFQ	S/he cried a lot	0.51	-0.073	0.76	-0.041	0.088	0.723	-0.088	0.083	0.737	-0.011	0.02	-0.048	-0.006	0.729	0.123	0.028	-0.059	0.098	0.733	0.006	0.023
SMFQ	S/he found it hard to think properly or concentrate	0.722	0.553	0.293	0.605	-0.003	0.26	0.545	0.049	0.351	0.021	0.034	0.547	0.102	0.344	0.011	0.055	0.489	0.017	0.333	0.163	0.016
SMFQ	S/he hated him/herself	0.692	-0.052	0.903	0.024	0.053	0.857	-0.014	0.049	0.88	-0.029	-0.029	0.055	-0.051	0.869	0.127	-0.016	0.052	0.101	0.859	-0.025	0.015
SMFQ	S/he felt s/he was a bad person	0.647	-0.007	0.816	0.031	0.107	0.758	-0.034	0.12	0.78	-0.006	-0.017	0.029	-0.037	0.774	0.192	-0.025	0.019	0.163	0.774	-0.006	0.046
SMFQ	S/he felt lonely	0.573	-0.06	0.821	-0.044	0.13	0.771	-0.029	-0.008	0.807	0.078	0.198	-0.011	0.005	0.749	0.01	0.265	0.017	0.011	0.697	-0.068	-0.025
SMFQ	S/he thought nobody really loved him/her	0.649	0.008	0.813	0.004	0.179	0.738	-0.072	0.169	0.762	0.038	0.02	-0.012	-0.045	0.759	0.251	0.001	-0.013	0.222	0.756	-0.029	0.07
SMFQ	S/he thought s/he could never be as good as other kids	0.582	0.032	0.731	0.153	-0.071	0.727	0.173	-0.099	0.766	-0.056	-0.018	0.216	-0.018	0.757	-0.066	0.04	0.208	-0.073	0.735	0.001	-0.052
SMFQ	S/he felt s/he did everything wrong	0.672	0.101	0.756	0.195	-0.001	0.721	0.163	0.017	0.758	-0.038	-0.053	0.219	-0.023	0.762	0.073	-0.021	0.213	0.067	0.746	-0.004	-0.02
APSD	Blames others for his/her mistakes	0.549	0.434	0.206	0.295	0.366	0.03	0.093	0.495	0.049	0.126	-0.059	0.124	0.022	0.137	0.554	-0.085	0.161	0.591	0.101	-0.067	0.048
APSD	Engages in illegal activities	0.422	0.238	0.29	0.143	0.261	0.179	-0.074	0.461	0.164	0.016	0.031	-0.092	0.187	0.161	0.392	0.068	-0.078	0.443	0.139	0.049	-0.031
APSD	Is concerned about how well s/he does at school (R)	0.204	0.334	-0.164	0.24	0.198	-0.271	0.28	0.005	-0.198	0.239	0.184	0.283	-0.084	-0.213	0.067	0.08	0.258	0.02	-0.214	0.022	0.202
APSD	Acts without thinking of the consequences	0.69	0.661	0.088	0.578	0.261	-0.063	0.381	0.439	-0.018	0.096	-0.035	0.385	0.123	0.039	0.427	-0.049	0.367	0.468	0.014	0.09	0.043
APSD	His/ her emotions seem shallow and not genuine	0.616	0.399	0.35	0.175	0.548	0.106	-0.035	0.572	0.134	0.245	0.101	-0.004	0.005	0.185	0.643	0.026	0.031	0.647	0.159	-0.07	0.158
APSD	Lies easily and skillfully	0.584	0.435	0.255	0.234	0.5	0.014	-0.022	0.648	0.019	0.153	-0.103	0.042	-0.005	0.148	0.713	-0.098	0.144	0.775	0.073	-0.2	-0.002
APSD	Is good at keeping promises (R)	0.462	0.425	0.088	0.261	0.396	-0.102	0.188	0.273	-0.036	0.29	0.159	0.208	-0.084	-0.003	0.378	0.007	0.183	0.319	0.013	0.018	0.274
APSD	Brags excessively about his/her abilities, accomplishments, or possessions	0.408	0.316	0.162	0.175	0.333	0.018	-0.147	0.684	-0.037	-0.012	-0.025	-0.187	0.279	-0.024	0.578	0.047	-0.147	0.677	-0.068	0.041	-0.097
APSD	Gets bored easily	0.591	0.522	0.14	0.493	0.122	0.073	0.294	0.378	0.091	-0.02	0.009	0.26	0.247	0.083	0.263	-0.002	0.177	0.282	0.116	0.268	0.046
APSD	Uses or cons other people to get what s/he wants	0.574	0.405	0.281	0.246	0.407	0.097	-0.047	0.661	0.082	0.066	-0.016	-0.052	0.185	0.124	0.62	-0.006	-0.033	0.677	0.1	0.037	0.006
APSD	Teases, makes fun of other people	0.445	0.391	0.114	0.228	0.388	-0.072	-0.007	0.561	-0.079	0.119	-0.046	0.008	0.055	0.001	0.598	-0.106	0.025	0.621	-0.005	-0.011	0.093
APSD	Feels bad and guilty when he/she does something wrong (R)	0.208	0.256	-0.047	0.038	0.454	-0.25	0.01	0.231	-0.2	0.357	0.22	0.03	-0.159	-0.18	0.376	0.023	0.02	0.293	-0.155	-0.044	0.341
APSD	Engages in risky or dangerous activities	0.379	0.373	0.038	0.332	0.121	-0.029	0.142	0.372	-0.036	-0.032	-0.051	0.119	0.19	-0.021	0.291	-0.024	0.1	0.342	-0.028	0.12	-0.035
APSD	Can be charming at times but in ways that seem insincere or superficial	0.554	0.377	0.291	0.204	0.431	0.1	-0.076	0.645	0.089	0.091	0.007	-0.077	0.16	0.128	0.618	0.014	-0.047	0.672	0.098	0.005	0.015
APSD	Becomes angry when corrected or punished	0.52	0.328	0.308	0.21	0.328	0.161	0.012	0.462	0.171	0.093	-0.053	0.042	0.026	0.246	0.516	-0.123	0.036	0.515	0.261	0.018	0.112
APSD	Seems to think s/he is better than other people	0.425	0.275	0.244	0.086	0.435	0.06	-0.231	0.713	0.014	0.053	-0.013	-0.248	0.196	0.05	0.67	0.035	-0.18	0.757	-0.004	-0.056	-0.058
APSD	Does not plan ahead and leaves things to the “last minute’’	0.55	0.603	-0.042	0.616	0.037	-0.108	0.595	0.008	0.001	0.105	-0.053	0.629	-0.065	0.073	0.075	-0.028	0.654	0.118	-0.002	-0.076	-0.022
APSD	Is concerned about feeling for others (R)	0.289	0.29	0.024	0.009	0.588	-0.232	0.003	0.244	-0.16	0.479	0.35	0.023	-0.202	-0.161	0.422	0.09	-0.007	0.291	-0.117	-0.02	0.464
APSD	Does not show feelings or emotions	0.307	0.161	0.229	-0.016	0.408	0.062	-0.035	0.183	0.111	0.309	0.372	-0.056	0.005	0.024	0.213	0.3	-0.058	0.174	0.004	0.003	0.202
APSD	Keeps the same friends (R)	0.263	0.139	0.192	0.036	0.254	0.089	0.018	0.123	0.124	0.189	0.234	0.004	0.018	0.07	0.136	0.233	0.032	0.144	0.022	-0.051	0.061
	Factor correlations	F1	F1	F2	F1	F2	F3	F1	F2	F3	F4	F1	F2	F3	F4	F5	F1	F2	F3	F4	F5	F6
	F1	1	1	0.453	1	0.508	0.439	1	0.457	0.355	0.228	1	0.327	0.209	0.23	0.227	1	0.336	0.342	0.344	0.298	0.189
	F2			1		1	0.341		1	0.375	0.258		1	0.314	0.258	0.453		1	0.431	0.3	0.417	0.17
	F3						1			1	0.173			1	0.308	0.265			1	0.319	0.383	0.099
	F4										1				1	0.244				1	0.164	0.012
	F5															1					1	-0.064
	F6																					1
	Fit indices	1-factor	2-factor		3-factor			4-factor				5-factor					6-factor
	CFI	0.71	0.785		0.84			0.889				0.927					0.94
	TLI	0.705	0.777		0.83			0.88				0.919					0.932
	RMSEA	0.041	0.035		0.031			0.026				0.021					0.02
	SRMR	0.094	0.077		0.065			0.054				0.04					0.037
Notes: Bold indicates primary loadings (≥0.35) with at least │0.10│ difference from the second largest loading in the same factor structure.
All items were scored in the direction of difficulties or reversed-coded where necessary, so that higher scores reflected more severe difficulties.
Abbreviations:
(R)=reversed item
APSD=Antisocial Process Screening Device
CAST=Childhood Autism Spectrum Test
CFI=comparative fit index. Adequate when ≥0.90
CPRS=Conners Parent Rating Scale-Revised
RMSEA=root mean square error of approximation. Adequate when ≤0.08D&E
SDQ=Strenghts and Difficulties Questionnaire
SMFQ=Short Moods and Feelings Questionnaire
SRMR=standardized root mean square residual. Adequte when ≤0.08
TFI=Tucker-Lewis index. Adequate when ≥0.90

## Sheet: ST7
Supplementary Table 7. Factor loadings for models from 1 to 8 factors from the exploratory structural equation modelling analyses of parent-reported neurodevelopmental and other psychiatric traits at age 16.
		1-factor	2-factor		3-factor			4-factor				5-factor					6-factor						7-factor							8-factor
Original measure	Item	p	Neurodevelopmental/ Externalizing	Internalizing	Dysregulation/Distress	Neurodevelopmental/ Externalizing	Social Difficulties/ Detachmnt	Internalizing	Inattention	Dysregulation/ Antisociality	Detachment	Neurodevelopmental	Internalizing	Detachment	Antisociality	Repetitive and restricted behaviors and interests	Inattention	Internalizing	Antisociality	Social/ Immagination Difficulties	Hyperactivity/ Repetitive and restricted behaviors and interests	Emotional Detachment	Internalizing	Inattention	Emotional Detachment	Antisociality	Social Difficulties	Hyperactivity/ Repetitive and restricted behaviors and interests	Imagination Difficulties	Inattention	Internalizing	Emotional Detachment	Hyperactivity	Antisociality	Social Difficulties	Imagination Difficulties	Repetitive and restricted behaviors and interests
CPRS	Is always “on the go” or acts as if driven by a motor	0.153	0.127	0.057	0.431	0.001	-0.188	-0.061	-0.169	0.551	-0.257	0.222	-0.084	-0.2	-0.048	0.464	0.1	-0.095	0.038	-0.07	0.545	-0.058	-0.03	0.006	-0.157	-0.003	-0.18	0.551	0.038	0.019	-0.083	-0.063	0.533	-0.02	-0.161	0.091	0.156
CPRS	Avoids, expresses reluctance about, or has difficulties engaging in tasks that require sustained mental effort (such as work or schoolwork)	0.76	0.834	-0.071	0.468	0.67	-0.039	0.081	0.77	0.086	0.052	0.836	0.084	0.021	-0.015	-0.142	0.895	0.054	-0.101	0.026	-0.066	0.001	0.032	0.845	0.031	-0.06	0.047	-0.018	0.093	0.812	0.059	0.025	0.005	-0.035	0.011	0.116	-0.026
CPRS	Has difficulties sustaining attention in tasks or activities	0.79	0.849	-0.045	0.532	0.659	-0.048	0.105	0.762	0.135	0.012	0.886	0.085	0.02	-0.063	-0.075	0.925	0.052	-0.136	0.043	0.014	-0.009	0.038	0.85	0.017	-0.097	0.039	0.061	0.123	0.825	0.036	0.025	0.096	-0.077	0.018	0.14	-0.02
CPRS	Does not seem to listen to what is being said to him/her	0.715	0.715	0.066	0.488	0.551	0.051	0.083	0.459	0.357	0.083	0.636	0.096	0.004	0.143	0.087	0.683	0.016	0.085	-0.009	0.161	0.138	0.034	0.595	0.167	0.068	-0.086	0.226	0.042	0.586	-0.036	0.233	0.276	0.071	-0.02	0.034	-0.016
CPRS	Runs about excessively in situations where it is inappropriate to do so	0.595	0.539	0.146	0.601	0.334	-0.028	0.073	0.135	0.611	-0.083	0.488	0.073	-0.096	0.095	0.379	0.426	0.031	0.124	0.006	0.463	0.016	0.067	0.336	-0.091	0.107	-0.054	0.496	0.037	0.338	-0.011	0.031	0.529	0.093	-0.007	0.057	0.08
CPRS	Does not follow through on instructions and fails to finish work, schoolwork or chores	0.733	0.81	-0.063	0.456	0.654	-0.033	0.024	0.661	0.207	0.072	0.728	0.084	-0.041	0.119	-0.096	0.815	0.028	0.028	-0.076	-0.024	0.1	0.018	0.793	0.066	0.058	-0.023	0.033	-0.028	0.775	0.017	0.099	0.062	0.076	0.005	-0.035	-0.003
CPRS	Has difficulty organising tasks and activities	0.714	0.729	0.037	0.436	0.584	0.062	0.148	0.654	0.102	0.099	0.771	0.1	0.107	-0.029	-0.078	0.837	0.037	-0.122	0.078	-0.017	0.097	-0.002	0.796	0.06	-0.074	0.131	0.044	0.032	0.778	-0.003	0.081	0.043	-0.057	0.132	0.052	0.011
CPRS	Talks excessively	0.376	0.339	0.097	0.625	0.142	-0.196	0.024	0.021	0.608	-0.3	0.352	0.091	-0.276	-0.016	0.414	0.241	0.096	0.071	-0.106	0.522	-0.13	0.143	0.194	-0.307	0.058	-0.102	0.506	0.006	0.207	0.044	-0.184	0.604	0.046	-0.032	-0.013	0.062
CPRS	Fails to give close attention to details or makes careless mistakes in work, schoolwork or other activities	0.677	0.764	-0.074	0.449	0.611	-0.062	0.027	0.661	0.165	0.029	0.79	0.023	-0.009	0	-0.063	0.837	-0.009	-0.075	0.002	0.012	0.015	-0.023	0.791	-0.008	-0.035	0.027	0.058	0.06	0.77	-0.016	0.011	0.078	-0.015	0.019	0.075	0.001
CPRS	Has difficulty queuing or awaiting turn in games or group situations	0.65	0.59	0.155	0.594	0.389	0.012	0.077	0.162	0.622	-0.028	0.46	0.12	-0.103	0.188	0.334	0.407	0.086	0.215	0.008	0.416	-0.002	0.121	0.331	-0.093	0.198	-0.045	0.442	0.036	0.332	0.031	0.018	0.514	0.188	0.018	0.034	0.039
CPRS	Interrupts conversations	0.536	0.483	0.136	0.609	0.284	-0.073	0.06	0.096	0.62	-0.144	0.368	0.147	-0.202	0.139	0.35	0.289	0.138	0.199	-0.052	0.444	-0.085	0.183	0.229	-0.192	0.179	-0.086	0.444	0.034	0.237	0.052	-0.065	0.587	0.167	0.01	-0.015	-0.01
CPRS	Is forgetful in daily activities	0.649	0.645	0.069	0.47	0.491	0.035	0.128	0.504	0.23	0.036	0.655	0.121	0.025	0.015	0.025	0.728	0.037	-0.065	-0.021	0.091	0.161	0.023	0.685	0.107	-0.049	0.011	0.155	-0.034	0.676	-0.01	0.169	0.164	-0.041	0.056	-0.03	0.027
CPRS	Fidgets with hands or feet, squirms in seat	0.601	0.51	0.193	0.662	0.279	-0.036	0.127	0.128	0.609	-0.139	0.631	0.016	-0.001	-0.102	0.447	0.536	-0.038	-0.071	0.115	0.539	0.011	-0.032	0.465	-0.282	-0.02	0.179	0.556	0.001	0.469	-0.219	0.001	0.661	-0.047	0.262	-0.044	0.02
CPRS	Has difficulty playing or engaging in leisure activities quietly	0.601	0.593	0.078	0.587	0.393	-0.071	0.048	0.26	0.528	-0.098	0.54	0.087	-0.136	0.085	0.272	0.472	0.082	0.117	0.005	0.366	-0.099	0.112	0.402	-0.186	0.12	-0.028	0.374	0.084	0.402	-0.012	-0.065	0.518	0.113	0.047	0.04	-0.039
CPRS	Often loses things necessary for tasks or activities (e.g. work or schoolwork)	0.619	0.654	0.009	0.493	0.492	-0.049	0.07	0.514	0.256	-0.028	0.645	0.112	-0.068	0.026	0.015	0.714	0.051	-0.042	-0.091	0.088	0.104	0.044	0.693	0.017	-0.02	-0.024	0.136	-0.056	0.682	0.028	0.075	0.158	-0.008	0.014	-0.057	0.027
CPRS	Regularly leaves seat in classroom, or in other situations in which remaining in seat is expected	0.711	0.735	0.035	0.61	0.519	-0.074	0.02	0.386	0.527	-0.052	0.648	0.069	-0.13	0.132	0.218	0.622	0.046	0.13	-0.028	0.313	-0.037	0.075	0.55	-0.109	0.134	-0.061	0.341	0.059	0.543	0.002	-0.013	0.425	0.133	-0.012	0.049	0.009
CPRS	Is easily distracted by things going on around them	0.7	0.734	0.01	0.616	0.518	-0.105	0.063	0.519	0.38	-0.103	0.763	0.075	-0.102	-0.024	0.141	0.748	0.055	-0.041	-0.016	0.244	-0.055	0.076	0.657	-0.064	-0.037	-0.068	0.274	0.118	0.644	0.017	-0.002	0.353	-0.03	-0.043	0.117	-0.015
CPRS	Blurts out answers to questions before the questions have been completed	0.512	0.501	0.074	0.617	0.293	-0.145	-0.02	0.095	0.658	-0.177	0.437	0.041	-0.226	0.107	0.39	0.383	0.006	0.144	-0.119	0.485	0.001	0.052	0.33	-0.175	0.129	-0.124	0.504	-0.045	0.34	-0.035	-0.04	0.557	0.119	-0.042	-0.05	0.095
CPRS	Changes mood quickly and drastically	0.671	0.472	0.345	0.698	0.255	0.073	0.239	0.046	0.67	-0.104	0.14	0.465	-0.241	0.31	0.267	0.12	0.444	0.363	-0.12	0.348	-0.032	0.503	0.063	0.005	0.287	-0.197	0.341	0.022	0.059	0.431	0.065	0.475	0.273	-0.132	-0.013	-0.042
CPRS	Cries often and easily	0.466	0.147	0.458	0.606	-0.014	0.129	0.454	0.073	0.307	-0.213	0.066	0.6	-0.14	-0.02	0.161	0.043	0.588	0.041	-0.052	0.232	-0.063	0.603	0.023	-0.071	0.003	-0.015	0.204	0.011	0.018	0.565	-0.048	0.307	-0.001	0	-0.009	-0.043
CPRS	Has temper outbursts - behaviour can be explosive or unpredictable	0.694	0.511	0.327	0.709	0.292	0.055	0.196	0.033	0.73	-0.094	0.111	0.461	-0.283	0.387	0.263	0.087	0.453	0.446	-0.139	0.343	-0.068	0.516	0.044	-0.041	0.373	-0.206	0.327	0.017	0.041	0.441	0.018	0.485	0.36	-0.133	-0.032	-0.058
SANS	Often fails to smile or laugh at things others would find funny	0.6	0.255	0.508	0.281	0.174	0.498	0.451	0.011	0.248	0.295	0.058	0.419	0.278	0.228	0.126	0.106	0.306	0.194	0.208	0.128	0.269	0.322	-0.022	0.422	0.129	0.05	0.192	0.081	-0.026	0.271	0.439	0.184	0.109	0.062	0.118	-0.002
SANS	Seems emotionally “flat”, for example, rarely changes the emotions he/she shows	0.637	0.285	0.521	0.171	0.231	0.596	0.46	0.066	0.142	0.434	0.077	0.384	0.401	0.263	0.037	0.226	0.195	0.147	0.187	0.014	0.492	0.208	0.086	0.654	0.078	0.027	0.123	0.006	0.081	0.191	0.663	0.027	0.057	0.034	0.074	0.052
SANS	Usually gives brief, one word replies to questions, even if encouraged to say more	0.634	0.327	0.469	0.075	0.303	0.603	0.4	0.146	0.052	0.513	0.194	0.247	0.492	0.229	-0.012	0.372	0.023	0.075	0.213	-0.032	0.557	0.047	0.185	0.743	0.016	-0.002	0.106	0.057	0.177	-0.016	0.759	0.041	-0.001	0.031	0.11	0.005
SANS	Often does not have much to say for himself/ herself	0.604	0.264	0.502	-0.011	0.262	0.668	0.449	0.15	-0.071	0.565	0.135	0.277	0.562	0.205	-0.086	0.334	0.053	0.029	0.261	-0.137	0.581	0.059	0.165	0.783	-0.021	0.08	-0.005	0.05	0.156	0.014	0.776	-0.087	-0.036	0.099	0.103	-0.01
SANS	Often sits around for a long time doing nothing	0.562	0.37	0.319	0.32	0.276	0.306	0.356	0.301	0.087	0.168	0.228	0.413	0.13	0.13	-0.085	0.376	0.281	0.035	-0.024	-0.06	0.316	0.272	0.331	0.425	-0.01	-0.054	0.01	-0.07	0.313	0.301	0.427	-0.044	-0.011	-0.05	-0.039	0.018
SANS	Has a lack of energy and motivation	0.653	0.438	0.361	0.314	0.346	0.388	0.422	0.404	0.011	0.248	0.276	0.475	0.201	0.148	-0.176	0.466	0.325	0.015	0.001	-0.165	0.379	0.287	0.452	0.46	-0.008	0.041	-0.084	-0.119	0.431	0.329	0.459	-0.15	-0.005	0.042	-0.091	0.013
SANS	Has very few interests or hobbies	0.579	0.343	0.374	0.193	0.286	0.444	0.416	0.307	-0.034	0.311	0.191	0.415	0.282	0.15	-0.154	0.305	0.316	0.062	0.171	-0.156	0.233	0.268	0.283	0.331	0.059	0.181	-0.098	-0.006	0.27	0.252	0.334	-0.088	0.057	0.188	-0.011	-0.06
SANS	Has few or no friends	0.599	0.154	0.617	0.195	0.104	0.627	0.6	0.085	0.005	0.355	0.134	0.448	0.475	0.027	0.038	0.138	0.37	-0.004	0.449	0.022	0.15	0.253	0.176	0.007	0.063	0.592	0.061	-0.033	0.183	0.258	0.016	-0.015	0.059	0.56	0.025	0.087
SANS	Often does not pay attention when being spoken to	0.765	0.691	0.18	0.52	0.518	0.15	0.179	0.395	0.399	0.121	0.561	0.203	0.04	0.187	0.117	0.635	0.077	0.119	-0.03	0.189	0.265	0.104	0.53	0.314	0.076	-0.131	0.269	-0.001	0.52	0.005	0.403	0.329	0.073	-0.024	-0.025	-0.038
SANS	Is often inattentive and appears distracted	0.802	0.696	0.229	0.578	0.503	0.164	0.236	0.413	0.403	0.095	0.611	0.239	0.061	0.125	0.144	0.683	0.106	0.054	-0.009	0.223	0.274	0.126	0.573	0.302	0.013	-0.095	0.307	0.001	0.56	0.058	0.381	0.323	0.011	-0.017	0.01	0.008
SMFQ	Didn’t enjoy anything at all	0.637	0.269	0.533	0.43	0.152	0.421	0.54	0.19	0.149	0.138	0.027	0.655	0.102	0.2	-0.056	0.128	0.57	0.161	0.029	-0.036	0.195	0.559	0.106	0.301	0.115	0.04	-0.01	-0.036	0.088	0.591	0.277	-0.031	0.11	0.005	0.002	0.007
SMFQ	Felt unreasonably tired, so that he/she just sat around and did nothing	0.505	0.263	0.373	0.393	0.155	0.263	0.388	0.188	0.161	0.056	0.124	0.478	0.046	0.105	-0.002	0.23	0.384	0.054	-0.048	0.023	0.228	0.38	0.205	0.291	0.009	-0.044	0.065	-0.082	0.188	0.442	0.277	-0.014	0.008	-0.074	-0.024	0.069
SMFQ	Felt he/she was no good anymore	0.664	0.085	0.737	0.663	-0.063	0.346	0.731	0.245	0.059	-0.142	-0.045	0.909	-0.06	0.021	-0.096	0.049	0.864	0.022	-0.079	-0.055	0.052	0.829	0.105	0.065	0	0.087	-0.078	-0.105	0.084	0.893	0.007	-0.096	0.008	0.005	-0.048	0.034
SMFQ	Cried a lot	0.512	0.058	0.6	0.637	-0.09	0.204	0.592	0.117	0.19	-0.229	-0.082	0.802	-0.163	0.012	0.027	-0.055	0.789	0.062	-0.109	0.085	-0.048	0.792	-0.032	-0.021	0.02	-0.015	0.043	-0.041	-0.046	0.8	-0.044	0.122	0.021	-0.038	-0.048	-0.046
SMFQ	Found it hard to think properly or concentrate	0.673	0.476	0.34	0.572	0.309	0.179	0.406	0.454	0.149	-0.024	0.448	0.482	0.014	-0.023	-0.035	0.504	0.438	-0.057	0.018	0.03	0.037	0.425	0.462	0.105	-0.067	0.034	0.05	0.053	0.439	0.456	0.086	0.054	-0.059	-0.02	0.094	0.005
SMFQ	Hated him/herself	0.708	0.064	0.799	0.69	-0.086	0.376	0.773	0.226	0.073	-0.143	-0.093	0.957	-0.063	0.052	-0.096	-0.019	0.925	0.071	-0.051	-0.053	0.001	0.891	0.038	0.03	0.048	0.107	-0.088	-0.074	0.017	0.932	-0.031	-0.065	0.055	0.032	-0.03	-0.001
SMFQ	Felt he/she was a bad person	0.686	0.128	0.715	0.687	-0.03	0.318	0.691	0.231	0.134	-0.15	-0.028	0.879	-0.091	0.064	-0.059	0.032	0.853	0.088	-0.06	-0.008	-0.019	0.826	0.085	-0.019	0.07	0.095	-0.042	-0.071	0.068	0.868	-0.072	-0.02	0.079	0.026	-0.03	0.019
SMFQ	Felt lonely	0.593	0.052	0.703	0.524	-0.075	0.431	0.725	0.143	0.043	-0.028	-0.038	0.815	0.097	-0.02	-0.027	0.01	0.768	-0.011	0.092	-0.002	0.057	0.714	0.049	0.04	-0.014	0.238	-0.015	-0.059	0.038	0.764	-0.007	-0.049	-0.011	0.168	-0.006	0.043
SMFQ	Thought nobody really loved him/ her	0.674	0.184	0.656	0.597	0.043	0.365	0.614	0.123	0.253	-0.027	-0.148	0.83	-0.083	0.266	-0.026	-0.09	0.801	0.293	-0.055	0.008	0.02	0.792	-0.046	0.057	0.254	0.043	-0.019	-0.077	-0.065	0.841	0.008	-0.003	0.257	-0.019	-0.037	0.019
SMFQ	Thought he/she could never be as good as other kids	0.627	0.147	0.641	0.6	0.002	0.331	0.69	0.333	-0.024	-0.105	0.129	0.804	0.028	-0.101	-0.11	0.184	0.779	-0.098	0.042	-0.064	-0.024	0.737	0.2	0.035	-0.103	0.157	-0.086	0.019	0.177	0.783	-0.033	-0.078	-0.092	0.066	0.069	-0.017
SMFQ	Felt he/she did everything wrong	0.657	0.214	0.609	0.65	0.056	0.278	0.615	0.288	0.132	-0.12	0.09	0.787	-0.074	0.036	-0.058	0.148	0.761	0.047	-0.048	-0.003	-0.014	0.747	0.161	0.05	0.019	0.037	-0.025	-0.01	0.139	0.795	-0.007	-0.011	0.028	-0.045	0.041	0.006
ARBQ	Is afraid of small enclosed spaces, heights, water, or the dark	0.235	0.02	0.301	0.283	-0.053	0.15	0.321	0.012	0.1	-0.071	0.074	0.312	0.05	-0.115	0.117	0.036	0.298	-0.08	0.099	0.151	-0.027	0.278	0.021	-0.077	-0.076	0.145	0.142	0.026	0.022	0.213	-0.032	0.218	-0.084	0.166	0.006	-0.038
ARBQ	Takes a long time to warm to strangers	0.457	-0.067	0.676	0.051	-0.066	0.684	0.614	-0.122	-0.04	0.381	-0.052	0.408	0.544	-0.007	0.094	-0.041	0.298	-0.039	0.468	0.054	0.254	0.206	-0.065	0.198	-0.008	0.519	0.109	-0.004	-0.058	0.061	0.295	0.17	-0.032	0.561	-0.018	-0.051
ARBQ	Is afraid in social situations	0.592	-0.057	0.814	0.148	-0.077	0.774	0.774	-0.043	-0.086	0.368	-0.002	0.57	0.585	-0.076	0.061	0.009	0.464	-0.105	0.522	0.028	0.221	0.34	0.018	0.111	-0.047	0.649	0.073	-0.02	0.02	0.223	0.193	0.133	-0.064	0.671	-0.028	-0.054
ARBQ	Tends to check things are done exactly right	0.121	-0.299	0.552	0.256	-0.356	0.313	0.432	-0.477	0.311	-0.044	-0.213	0.303	0.172	-0.113	0.454	-0.315	0.229	-0.027	0.205	0.47	0.135	0.243	-0.422	0.131	-0.093	0.082	0.495	0.028	-0.402	0.216	0.17	0.377	-0.125	0.063	0.134	0.187
ARBQ	Asks for reassurance that he/she is OK	0.367	-0.041	0.549	0.505	-0.168	0.235	0.538	-0.076	0.229	-0.167	0.07	0.519	0.056	-0.208	0.273	-0.01	0.492	-0.13	0.138	0.33	-0.029	0.487	-0.077	-0.036	-0.162	0.123	0.319	0.076	-0.078	0.48	-0.035	0.301	-0.172	0.082	0.14	0.065
ARBQ	Insists on doing something over and over, to the extent that it interferes with day to day life	0.496	0.074	0.586	0.472	-0.052	0.362	0.5	-0.173	0.404	0.025	0.099	0.412	0.181	-0.035	0.395	0.003	0.348	0.034	0.255	0.438	0.071	0.342	-0.092	0.023	0.004	0.196	0.46	0.069	-0.082	0.32	0.055	0.39	-0.016	0.167	0.164	0.148
ARBQ	Tends to be shy and timid	0.459	-0.165	0.769	0.013	-0.149	0.763	0.742	-0.08	-0.212	0.38	-0.091	0.519	0.612	-0.112	-0.001	-0.054	0.405	-0.159	0.504	-0.053	0.267	0.292	-0.067	0.241	-0.121	0.587	-0.002	0.002	-0.062	0.152	0.321	0.067	-0.144	0.616	-0.022	-0.095
ARBQ	Is afraid of medical procedures such as going to see the doctor/dentist	0.324	0.067	0.364	0.287	-0.008	0.242	0.378	0.032	0.105	0.008	0.05	0.382	0.097	-0.036	0.087	0.036	0.351	-0.016	0.123	0.113	0.024	0.33	0.015	0.016	-0.022	0.148	0.115	0.025	0.013	0.257	0.064	0.2	-0.032	0.174	-0.001	-0.06
ARBQ	Has twitches, mannerisms, or tics of the face and body	0.376	0.181	0.297	0.296	0.096	0.212	0.271	0.039	0.216	0.063	0.273	0.153	0.179	-0.072	0.207	0.229	0.104	-0.065	0.211	0.237	0.061	0.08	0.173	-0.024	-0.047	0.215	0.265	0.048	0.176	0.03	0.046	0.25	-0.059	0.21	0.087	0.063
ARBQ	Doesn’t tend to enjoy him/herself	0.676	0.143	0.712	0.338	0.052	0.64	0.701	0.056	0.087	0.273	-0.067	0.71	0.322	0.162	0.003	-0.001	0.61	0.133	0.253	-0.006	0.227	0.559	-0.021	0.28	0.114	0.294	0.028	-0.022	-0.029	0.557	0.274	0.004	0.101	0.271	0.014	0.004
ARBQ	Often makes comments critical of him/herself	0.489	-0.01	0.647	0.555	-0.143	0.311	0.687	0.129	0.04	-0.165	-0.032	0.801	0.001	-0.129	0.007	-0.016	0.779	-0.089	0.034	0.053	-0.027	0.75	-0.005	0	-0.109	0.137	0.02	0.001	-0.021	0.759	-0.028	0.072	-0.108	0.093	0.011	-0.049
ARBQ	Complains or whines a lot	0.594	0.34	0.401	0.531	0.189	0.22	0.358	0.084	0.419	0.001	0.074	0.522	-0.08	0.237	0.142	0.057	0.507	0.281	0.013	0.197	-0.037	0.528	0.023	0.007	0.238	-0.013	0.186	0.043	0.016	0.455	0.049	0.332	0.228	0.032	-0.003	-0.091
ARBQ	Has low self confidence	0.622	0.095	0.698	0.442	-0.017	0.521	0.766	0.228	-0.078	0.078	0.054	0.795	0.236	-0.077	-0.092	0.097	0.747	-0.084	0.226	-0.074	0.048	0.679	0.103	0.097	-0.074	0.332	-0.078	0.038	0.085	0.662	0.078	-0.016	-0.076	0.296	0.037	-0.096
ARBQ	Is fussy or over-particular	0.41	0	0.563	0.425	-0.109	0.338	0.473	-0.239	0.393	0.002	-0.055	0.445	0.116	0.029	0.367	-0.129	0.381	0.1	0.173	0.404	0.093	0.392	-0.218	0.097	0.043	0.089	0.421	0.038	-0.208	0.342	0.146	0.399	0.017	0.092	0.095	0.093
ARBQ	Tends to blame him/herself	0.522	-0.038	0.71	0.576	-0.173	0.348	0.734	0.112	0.035	-0.159	0.016	0.796	0.062	-0.196	0.05	0.036	0.752	-0.166	0.074	0.094	0.029	0.717	0.029	0.041	-0.186	0.17	0.076	-0.001	0.018	0.736	0.011	0.07	-0.187	0.112	0.045	0.014
ARBQ	Is often extremely upset or distressed when parent leaves wound up or stressed	0.402	0.045	0.494	0.529	-0.093	0.187	0.479	-0.013	0.26	-0.169	0.118	0.494	0.008	-0.158	0.247	0.08	0.451	-0.107	0.056	0.305	0.028	0.456	0.016	0.026	-0.147	0.041	0.305	0.034	0.013	0.455	0.037	0.281	-0.156	0.012	0.092	0.072
ARBQ	Often seems worked up, on edge or tense	0.609	0.204	0.578	0.603	0.043	0.301	0.526	0.006	0.4	-0.052	0.028	0.643	-0.021	0.118	0.212	0.013	0.599	0.166	0.042	0.264	0.036	0.607	-0.021	0.036	0.12	0.05	0.26	-0.003	-0.028	0.595	0.055	0.29	0.109	0.04	0.026	0.03
ARBQ	Is afraid of animals or insects (like dogs, spiders, or snakes)	0.149	-0.032	0.251	0.154	-0.071	0.163	0.233	-0.088	0.105	0.004	-0.039	0.218	0.072	-0.021	0.12	-0.071	0.198	0.01	0.096	0.132	0.02	0.194	-0.101	0.028	-0.008	0.075	0.134	0.027	-0.099	0.146	0.056	0.17	-0.018	0.091	0.025	-0.014
ARBQ	Is anxious that bad things will happen	0.471	0.009	0.614	0.499	-0.118	0.338	0.623	0.007	0.157	-0.085	0.072	0.615	0.121	-0.167	0.182	0.023	0.58	-0.111	0.181	0.228	-0.005	0.551	-0.016	-0.025	-0.124	0.223	0.218	0.055	-0.021	0.538	-0.025	0.225	-0.131	0.186	0.1	0.025
ICUT	Expresses his/her feelings openly (R)	0.399	0.276	0.209	-0.199	0.308	0.494	0.115	0.027	0.022	0.588	-0.001	0.004	0.424	0.405	-0.077	0.083	-0.096	0.309	0.296	-0.144	0.303	-0.107	0.002	0.485	0.285	0.127	-0.061	0.064	-0.007	-0.068	0.445	-0.193	0.274	0.081	0.15	0.06
ICUT	Does not seem to know “right” from “wrong”	0.406	0.362	0.107	0.299	0.272	0.074	0.058	0.106	0.346	0.063	0.186	0.138	-0.055	0.225	0.117	0.187	0.111	0.228	-0.019	0.155	0.036	0.144	0.136	0.085	0.193	-0.104	0.174	0.03	0.132	0.113	0.121	0.212	0.186	-0.082	0.032	0.004
ICUT	Cares about their work or schoolwork (R)	0.613	0.791	-0.237	0.137	0.725	-0.005	-0.185	0.612	0.101	0.282	0.574	-0.114	0.016	0.328	-0.238	0.649	-0.117	0.232	0.009	-0.212	0.003	-0.135	0.657	0.007	0.283	0.052	-0.166	0.029	0.615	-0.021	-0.046	-0.212	0.308	-0.022	0.081	0.032
ICUT	Does not care who he/she hurts to get what he/she wants	0.596	0.529	0.16	0.329	0.425	0.192	0.013	-0.03	0.641	0.22	-0.022	0.252	-0.133	0.621	0.153	-0.005	0.224	0.636	-0.08	0.18	0.068	0.271	-0.012	0.08	0.584	-0.137	0.193	-0.066	-0.017	0.261	0.112	0.242	0.574	-0.094	-0.071	0.027
ICUT	Feels bad or guilty when he/she has done something wrong (R)	0.441	0.545	-0.095	-0.059	0.522	0.189	-0.228	0.044	0.385	0.442	0.03	-0.116	0.04	0.663	-0.003	0.039	-0.118	0.641	0.073	-0.022	0.039	-0.1	0.045	0.068	0.636	0	0.007	-0.001	0.036	-0.057	0.047	-0.022	0.636	-0.009	0.031	0.052
ICUT	Does not show emotions	0.439	0.245	0.306	-0.051	0.244	0.486	0.195	-0.036	0.139	0.491	0.01	0.089	0.381	0.349	0.044	0.124	-0.064	0.243	0.203	-0.005	0.431	-0.046	-0.003	0.62	0.178	-0.015	0.105	0.02	-0.003	-0.061	0.633	-0.015	0.154	-0.014	0.096	0.078
ICUT	Does not care about being on time	0.411	0.475	-0.041	0.23	0.4	0.006	-0.035	0.315	0.198	0.095	0.289	0.082	-0.079	0.239	-0.071	0.378	0.04	0.176	-0.125	-0.045	0.114	0.047	0.389	0.108	0.172	-0.097	-0.011	-0.083	0.377	0.054	0.136	0.011	0.178	-0.066	-0.098	-0.005
ICUT	Is concerned about the feelings of others (R)	0.612	0.662	-0.015	-0.088	0.618	0.354	-0.177	0.005	0.46	0.603	0.011	-0.076	0.149	0.787	0.019	0.014	-0.09	0.759	0.186	-0.013	0.071	-0.084	0.015	0.097	0.759	0.104	0.027	0.012	0.01	-0.061	0.085	0.004	0.755	0.103	0.046	0.05
ICUT	Cares if he/she is in trouble (R)	0.56	0.703	-0.154	0	0.658	0.155	-0.276	0.167	0.431	0.448	0.144	-0.117	-0.013	0.716	-0.046	0.17	-0.114	0.681	0.027	-0.052	0.019	-0.09	0.178	0.06	0.678	-0.042	-0.022	0.004	0.162	-0.039	0.037	-0.032	0.683	-0.055	0.029	0.035
ICUT	Does not let feelings control him/her	-0.222	-0.146	-0.127	-0.178	-0.096	-0.085	-0.11	-0.046	-0.151	-0.026	-0.058	-0.154	0.009	-0.095	-0.056	-0.002	-0.182	-0.137	-0.077	-0.081	0.113	-0.186	0.013	0.094	-0.136	-0.059	-0.062	-0.082	0.025	-0.237	0.145	-0.046	-0.142	-0.003	-0.126	-0.024
ICUT	Does not care about doing things well	0.621	0.727	-0.124	0.24	0.64	0.019	-0.063	0.583	0.118	0.205	0.554	0.015	0.004	0.247	-0.194	0.653	-0.025	0.146	-0.045	-0.158	0.097	-0.04	0.656	0.104	0.177	-0.002	-0.104	-0.029	0.624	0.032	0.091	-0.134	0.195	-0.033	0	0.02
ICUT	Seems very cold and uncaring	0.614	0.452	0.289	0.151	0.384	0.431	0.167	-0.03	0.421	0.429	-0.064	0.284	0.146	0.58	0.063	0.014	0.184	0.539	0.069	0.049	0.283	0.211	-0.039	0.378	0.485	-0.039	0.106	-0.048	-0.042	0.171	0.413	0.122	0.466	0.012	-0.048	-0.002
ICUT	Easily admits to being wrong (R)	0.443	0.469	0.015	0.033	0.436	0.212	-0.098	0.052	0.35	0.37	0.017	0.019	0.039	0.571	0.005	0.016	0.02	0.564	0.088	-0.002	0.008	0.04	0.004	0.077	0.549	0.001	0.016	0.04	-0.003	0.032	0.073	0.057	0.545	0.012	0.038	-0.021
ICUT	It is easy to tell how he/she is feeling (R)	0.392	0.332	0.128	-0.18	0.35	0.419	0.017	0.01	0.115	0.56	-0.012	-0.043	0.333	0.481	-0.052	0.06	-0.125	0.4	0.23	-0.113	0.265	-0.127	-0.001	0.415	0.378	0.074	-0.038	0.033	-0.011	-0.066	0.371	-0.181	0.369	0.025	0.124	0.091
ICUT	Always tries his/her best (R)	0.649	0.848	-0.278	0.063	0.794	0.029	-0.221	0.648	0.063	0.373	0.507	-0.091	0.016	0.449	-0.344	0.612	-0.088	0.335	-0.014	-0.333	0.019	-0.121	0.665	-0.01	0.402	0.099	-0.284	-0.035	0.613	0.026	-0.077	-0.336	0.432	0.019	0.012	0.025
ICUT	Apologises to people he/she has hurt (R)	0.588	0.643	-0.021	-0.079	0.604	0.333	-0.16	0.045	0.413	0.573	-0.041	0.008	0.095	0.794	-0.06	-0.034	0.02	0.774	0.151	-0.089	0.003	0.028	-0.017	0.069	0.772	0.082	-0.07	0.034	-0.027	0.027	0.054	-0.013	0.769	0.093	0.021	-0.044
ICUT	Tries not to hurt others’ feelings (R)	0.628	0.686	-0.023	-0.012	0.627	0.309	-0.181	0.006	0.532	0.538	-0.025	0.006	0.042	0.822	0.016	-0.038	0.025	0.817	0.13	-0.003	-0.027	0.036	-0.009	-0.032	0.821	0.094	0.011	0.005	-0.017	0.05	-0.042	0.051	0.82	0.102	0.008	0.006
ICUT	Shows no remorse when he/she has done something wrong	0.541	0.533	0.071	0.189	0.46	0.195	-0.045	0.056	0.482	0.294	0.044	0.136	-0.047	0.577	0.061	0.077	0.105	0.564	-0.026	0.074	0.087	0.141	0.061	0.14	0.526	-0.104	0.1	-0.029	0.056	0.11	0.174	0.16	0.517	-0.056	-0.05	-0.016
ICUT	Is very expressive and emotional (R)	0.098	0.147	-0.051	-0.423	0.241	0.31	-0.102	0.034	-0.172	0.528	-0.007	-0.257	0.387	0.284	-0.168	0.054	-0.309	0.192	0.276	-0.248	0.197	-0.332	0.004	0.361	0.199	0.132	-0.181	0.085	0.002	-0.335	0.335	-0.255	0.192	0.113	0.118	-0.01
ICUT	Does not like to put the time into doing things well	0.634	0.764	-0.152	0.258	0.672	-0.012	-0.055	0.676	0.056	0.18	0.638	0.014	0.007	0.183	-0.241	0.741	-0.014	0.073	-0.037	-0.202	0.06	-0.039	0.749	0.059	0.12	0.035	-0.153	-0.009	0.714	0.031	0.04	-0.162	0.144	0	0.008	-0.01
ICUT	The feelings of others are unimportant to him/her	0.377	0.331	0.106	0.124	0.282	0.187	0.028	0.025	0.298	0.223	0.047	0.102	0.039	0.348	0.063	0.067	0.066	0.335	0.038	0.067	0.096	0.085	0.037	0.146	0.308	-0.035	0.095	-0.004	0.035	0.078	0.158	0.093	0.301	-0.021	0.01	0.025
ICUT	Hides his/her feelings from others	0.383	0.153	0.343	0.005	0.145	0.455	0.288	-0.003	0.049	0.378	-0.026	0.218	0.331	0.232	-0.005	0.085	0.091	0.141	0.172	-0.05	0.365	0.085	0.011	0.505	0.094	0.058	0.033	-0.022	0.007	0.083	0.515	-0.063	0.075	0.052	0.034	0.052
ICUT	Works hard on everything (R)	0.606	0.808	-0.278	0.072	0.755	0.003	-0.199	0.666	0.014	0.323	0.527	-0.083	0.012	0.369	-0.35	0.631	-0.077	0.256	-0.015	-0.336	0.001	-0.111	0.681	-0.028	0.325	0.102	-0.294	-0.018	0.633	0.01	-0.085	-0.312	0.354	0.038	0.007	-0.014
ICUT	Does things to make others feel good (R)	0.53	0.579	-0.015	-0.138	0.564	0.345	-0.11	0.153	0.209	0.586	0.06	-0.041	0.207	0.648	-0.138	0.084	-0.042	0.6	0.222	-0.177	0.034	-0.067	0.108	0.078	0.627	0.196	-0.144	0.04	0.098	-0.063	0.054	-0.113	0.63	0.198	0.034	-0.044
AQ	Prefers to do things with others rather than on his/her own (R)	0.118	-0.093	0.284	-0.096	-0.065	0.35	0.22	-0.176	-0.009	0.259	-0.109	0.078	0.316	0.054	0.08	-0.107	0.015	0.032	0.26	0.037	0.174	-0.046	-0.082	0.038	0.071	0.342	0.071	-0.079	-0.067	-0.044	0.058	-0.03	0.061	0.338	-0.028	0.115
AQ	Finds social situations easy (R)	0.521	-0.079	0.748	-0.088	-0.024	0.815	0.661	-0.043	-0.214	0.533	-0.043	0.4	0.694	0.004	-0.037	-0.047	0.318	-0.035	0.634	-0.101	0.182	0.174	-0.018	0.088	0.051	0.746	-0.056	0.023	-0.014	0.079	0.133	-0.027	0.037	0.744	0.029	-0.054
AQ	Would rather go to a library than to a party	0.134	-0.289	0.542	-0.024	-0.271	0.498	0.449	-0.356	0.014	0.229	-0.18	0.215	0.439	-0.102	0.224	-0.18	0.105	-0.123	0.349	0.169	0.292	-0.004	-0.111	-0.056	-0.05	0.577	0.214	-0.216	-0.084	0.007	0.001	0.032	-0.066	0.574	-0.123	0.241
AQ	Finds himself/herself drawn more strongly to people than to things (R)	0.289	0.024	0.37	-0.099	0.052	0.491	0.276	-0.13	0.021	0.415	-0.001	0.059	0.462	0.113	0.099	-0.041	0.004	0.098	0.446	0.054	0.134	-0.074	-0.046	0.031	0.152	0.479	0.096	0.022	-0.035	-0.075	0.034	-0.01	0.142	0.447	0.1	0.113
AQ	Finds it hard to make new friends	0.516	-0.006	0.679	0.034	0.001	0.719	0.628	-0.024	-0.106	0.435	-0.012	0.431	0.575	0.022	0.006	-0.011	0.353	-0.01	0.529	-0.04	0.169	0.219	0.04	0.018	0.073	0.683	-0.003	-0.038	0.047	0.193	0.037	-0.048	0.064	0.666	0	0.041
AQ	Enjoys social occasions (R)	0.529	-0.081	0.759	-0.122	-0.004	0.823	0.606	-0.107	-0.148	0.584	-0.038	0.308	0.725	0.051	0.023	-0.049	0.213	0.007	0.661	-0.048	0.217	0.043	0.031	-0.028	0.13	0.838	0.011	-0.074	0.044	-0.029	0.04	-0.021	0.115	0.837	-0.042	0.05
AQ	Enjoys meeting new people (R)	0.531	-0.048	0.724	-0.155	0.036	0.824	0.592	-0.048	-0.2	0.609	-0.039	0.317	0.723	0.078	-0.046	-0.049	0.239	0.035	0.669	-0.118	0.174	0.078	0.018	0.003	0.152	0.816	-0.069	-0.017	0.026	-0.028	0.069	-0.029	0.138	0.828	-0.023	-0.045
AQ	Gets anxious in new situations	0.362	-0.059	0.557	0.148	-0.091	0.501	0.555	-0.051	-0.037	0.195	-0.002	0.417	0.375	-0.098	0.08	-0.04	0.371	-0.085	0.384	0.07	0.064	0.294	-0.051	0.005	-0.048	0.454	0.083	0.049	-0.049	0.234	0.033	0.108	-0.06	0.444	0.065	-0.023
AQ	Prefers to do things the same way over and over again	0.394	0.048	0.488	0.272	-0.025	0.389	0.376	-0.206	0.324	0.165	0.122	0.186	0.307	-0.018	0.367	0.054	0.099	0.006	0.318	0.375	0.176	0.076	-0.037	0.105	-0.007	0.253	0.429	0.033	-0.031	0.13	0.102	0.219	-0.021	0.184	0.201	0.258
AQ	Does not get upset if his/her daily routine is disturbed (R)	0.304	0.082	0.324	0.182	0.031	0.281	0.227	-0.156	0.281	0.154	0.052	0.121	0.194	0.089	0.263	-0.05	0.099	0.144	0.271	0.279	0.006	0.096	-0.125	0.001	0.132	0.178	0.296	0.107	-0.122	0.136	-0.031	0.18	0.124	0.114	0.221	0.151
AQ	Enjoys doing things spontaneously (R)	0.388	0.096	0.417	0.009	0.091	0.509	0.341	-0.08	0.075	0.391	0.046	0.154	0.437	0.122	0.117	-0.036	0.126	0.14	0.475	0.092	0.042	0.074	-0.097	0.07	0.162	0.407	0.122	0.151	-0.096	0.09	0.026	0.03	0.156	0.34	0.246	0.08
AQ	Frequently gets strongly absorbed in one thing	0.228	0.027	0.29	0.186	-0.022	0.213	0.177	-0.188	0.288	0.093	0.08	0.05	0.17	0.014	0.292	0.097	-0.055	-0.014	0.101	0.283	0.278	-0.083	0.092	0.057	-0.002	0.177	0.342	-0.172	0.105	-0.028	0.099	0.133	-0.011	0.165	-0.047	0.28
AQ	Can easily keep track of several different people’s conversations (R)	0.464	0.333	0.23	0.038	0.314	0.382	0.269	0.316	-0.116	0.362	0.493	-0.02	0.475	-0.094	-0.014	0.354	0.02	-0.074	0.579	-0.006	-0.171	-0.014	0.19	0.075	-0.046	0.349	0.017	0.455	0.177	-0.024	-0.028	0.005	-0.037	0.24	0.53	-0.061
AQ	Finds it easy to do more than one thing at once (R)	0.531	0.444	0.18	0.09	0.41	0.34	0.235	0.418	-0.093	0.355	0.587	-0.031	0.436	-0.064	-0.043	0.472	0.006	-0.062	0.533	-0.029	-0.166	-0.023	0.308	0.094	-0.035	0.3	-0.002	0.451	0.289	-0.012	-0.017	-0.023	-0.021	0.183	0.53	-0.054
AQ	If there is an interruption, my child can switch back very quickly (R)	0.597	0.52	0.173	0.232	0.446	0.269	0.214	0.424	0.055	0.272	0.622	0.011	0.325	-0.025	0.03	0.503	0.054	-0.009	0.448	0.064	-0.186	0.039	0.347	0.031	0.01	0.233	0.084	0.413	0.327	0.068	-0.071	0.057	0.025	0.114	0.501	-0.011
AQ	If trying to imagine something, finds it easy to create a picture in his/her mind (R)	0.46	0.421	0.11	-0.013	0.403	0.325	0.118	0.306	-0.037	0.411	0.502	-0.156	0.43	0.031	0.009	0.299	-0.061	0.092	0.574	0.015	-0.265	-0.041	0.073	0.179	0.077	0.146	0.029	0.569	0.051	0.01	0.02	-0.03	0.09	-0.015	0.671	-0.042
AQ	When reading a book, can easily imagine what the characters might look like (R)	0.468	0.49	0.028	-0.001	0.469	0.256	0.054	0.389	-0.045	0.389	0.625	-0.246	0.409	-0.006	0.005	0.384	-0.117	0.072	0.595	0.024	-0.367	-0.065	0.096	0.228	0.034	0.023	0.032	0.714	0.067	-0.003	0.031	-0.019	0.052	-0.176	0.827	-0.073
AQ	Finds making up stories easy (R)	0.297	0.292	0.044	-0.118	0.307	0.267	0.075	0.273	-0.158	0.366	0.441	-0.211	0.424	-0.057	-0.051	0.256	-0.118	-0.008	0.552	-0.052	-0.266	-0.094	0.019	0.244	-0.035	0.089	-0.039	0.593	-0.005	-0.03	0.064	-0.116	-0.021	-0.087	0.702	-0.062
AQ	When reading a book, finds it difficult to work out the character’s intentions	0.386	0.364	0.077	0.091	0.327	0.19	0.085	0.263	0.042	0.243	0.503	-0.147	0.293	-0.046	0.075	0.325	-0.073	0.013	0.431	0.104	-0.236	-0.036	0.107	0.173	-0.024	0.015	0.118	0.5	0.084	0.054	0.018	0.008	-0.009	-0.153	0.628	0.029
AQ	Finds it difficult to imagine what it would be like to be someone else	0.371	0.29	0.154	0.036	0.269	0.282	0.123	0.145	0.064	0.311	0.362	-0.104	0.345	0.033	0.094	0.205	-0.059	0.081	0.456	0.103	-0.152	-0.033	0.003	0.208	0.046	0.079	0.128	0.439	-0.013	0.047	0.067	-0.001	0.054	-0.073	0.575	0.055
AQ	When he/she was younger, he/she found it easy to play games with children that involve pretending (R)	0.376	0.245	0.218	0.001	0.234	0.357	0.165	0.075	0.068	0.365	0.296	-0.081	0.404	0.061	0.112	0.164	-0.066	0.089	0.489	0.107	-0.075	-0.079	0.021	0.109	0.094	0.255	0.139	0.327	0.015	-0.046	0.026	0.035	0.094	0.147	0.442	0.065
AQ	Finds it easy to work out what someone is thinking or feeling (R)	0.51	0.395	0.216	0.004	0.373	0.421	0.134	0.1	0.165	0.482	0.297	-0.079	0.419	0.251	0.106	0.176	-0.071	0.269	0.509	0.097	-0.053	-0.074	0.022	0.162	0.267	0.24	0.138	0.341	0.016	-0.075	0.095	0.08	0.262	0.157	0.437	0.027
AQ	Finds it difficult to work out people’s intentions	0.342	0.231	0.189	0.093	0.197	0.255	0.139	0.058	0.141	0.24	0.244	-0.013	0.254	0.073	0.125	0.155	-0.014	0.095	0.318	0.133	-0.032	-0.007	0.03	0.138	0.075	0.107	0.163	0.238	0.021	0.054	0.059	0.044	0.077	0.009	0.354	0.091
AQ	Usually notices car number plates or similar strings of information	0.013	-0.187	0.258	0.204	-0.227	0.058	-0.058	-0.534	0.564	-0.022	-0.044	-0.202	0.036	0.043	0.551	-0.015	-0.332	0.012	-0.092	0.503	0.438	-0.329	0.005	0.049	0.004	0.014	0.58	-0.381	0.008	-0.039	0.025	0.03	0.005	-0.095	-0.06	0.622
AQ	Is fascinated by dates	0.124	-0.362	0.625	0.39	-0.424	0.239	0.009	-0.818	0.86	0.044	-0.015	-0.251	0.168	0.035	0.824	0.007	-0.423	-0.009	-0.013	0.724	0.623	-0.432	0.031	0.048	-0.002	0.155	0.825	-0.508	0.02	0.03	-0.028	-0.001	0.003	-0.04	0.007	0.864
AQ	Is fascinated by numbers	0.073	-0.43	0.638	0.331	-0.473	0.268	-0.018	-0.895	0.846	0.089	-0.072	-0.318	0.214	0.054	0.837	-0.046	-0.498	0.003	0.013	0.713	0.664	-0.512	-0.02	0.082	0.011	0.174	0.822	-0.526	-0.029	-0.052	0.018	-0.025	0.013	-0.013	-0.011	0.88
AQ	Notices patterns in things all the time	0.08	-0.395	0.605	0.363	-0.452	0.226	0.038	-0.833	0.814	0.013	-0.073	-0.213	0.154	0.01	0.811	-0.034	-0.392	-0.04	-0.042	0.707	0.644	-0.406	0.006	0.05	-0.033	0.155	0.806	-0.544	0.002	0.021	0.007	0.014	-0.033	-0.01	-0.07	0.849
AQ	Likes to collect information about categories of things	0.163	-0.298	0.601	0.366	-0.364	0.271	0.113	-0.733	0.76	0.055	-0.003	-0.149	0.21	-0.004	0.76	0.008	-0.321	-0.04	0.057	0.683	0.571	-0.347	0.032	0.014	-0.022	0.237	0.776	-0.457	0.033	0.026	-0.028	0.058	-0.023	0.083	-0.015	0.785
SDQ	Is restless, overactive, and cannot stay still for long	0.564	0.533	0.108	0.649	0.312	-0.12	0	0.091	0.694	-0.158	0.559	-0.037	-0.129	0.03	0.469	0.431	-0.051	0.095	0.042	0.568	-0.086	-0.003	0.325	-0.239	0.095	-0.028	0.581	0.091	0.326	-0.133	-0.054	0.663	0.074	0.018	0.093	0.057
SDQ	Is constantly fidgeting	0.576	0.505	0.163	0.678	0.265	-0.089	0.077	0.083	0.667	-0.177	0.632	-0.04	-0.036	-0.107	0.498	0.504	-0.078	-0.055	0.115	0.596	-0.039	-0.063	0.426	-0.351	0	0.168	0.602	0.023	0.427	-0.268	-0.045	0.728	-0.03	0.25	-0.027	0.015
SDQ	Is easily distracted, concentration wanders	0.716	0.746	0.017	0.543	0.561	-0.037	0.099	0.601	0.253	-0.016	0.806	0.069	0.001	-0.049	0.05	0.805	0.048	-0.088	0.064	0.138	-0.046	0.055	0.702	0.007	-0.075	-0.009	0.175	0.17	0.68	0.034	0.027	0.218	-0.063	-0.03	0.198	-0.016
SDQ	Thinks things out before acting (R)	0.489	0.577	-0.065	0.199	0.505	0.048	-0.079	0.337	0.247	0.195	0.382	-0.025	-0.003	0.3	-0.03	0.333	0.024	0.307	0.12	0.008	-0.178	0.038	0.286	-0.087	0.32	0.029	0.006	0.191	0.268	0.039	-0.123	0.082	0.332	-0.002	0.192	-0.064
SDQ	Sees tasks through to the end, has good attention span (R)	0.7	0.804	-0.107	0.306	0.697	0.025	-0.019	0.678	0.107	0.198	0.732	-0.025	0.069	0.151	-0.154	0.742	-0.001	0.094	0.141	-0.104	-0.126	-0.018	0.686	-0.043	0.14	0.103	-0.076	0.203	0.652	0.027	-0.097	-0.042	0.165	0.035	0.232	-0.048
SDQ	Has a hot temper	0.546	0.431	0.22	0.57	0.264	0.013	0.105	0.018	0.635	-0.081	0.045	0.37	-0.289	0.388	0.213	0.009	0.381	0.453	-0.145	0.285	-0.102	0.44	-0.007	-0.103	0.397	-0.183	0.259	-0.001	-0.01	0.38	-0.053	0.41	0.388	-0.121	-0.052	-0.054
SDQ	Generally follows instructions, and usually does what adults request (R)	0.576	0.623	-0.006	0.248	0.537	0.103	-0.066	0.265	0.386	0.236	0.278	0.071	-0.052	0.457	-0.002	0.286	0.077	0.441	0.018	0.03	-0.04	0.097	0.271	-0.002	0.438	-0.029	0.045	0.052	0.257	0.095	-0.003	0.109	0.443	-0.019	0.044	-0.03
SDQ	Often fights with his/her friends and/or bullies them	0.525	0.461	0.15	0.459	0.325	0.044	0.075	0.104	0.518	0.004	0.15	0.267	-0.191	0.345	0.153	0.128	0.273	0.382	-0.084	0.21	-0.069	0.309	0.123	-0.102	0.357	-0.088	0.199	-0.009	0.116	0.284	-0.064	0.292	0.353	-0.058	-0.03	-0.01
SDQ	Often lies or cheats	0.638	0.649	0.053	0.401	0.522	0.069	-0.025	0.233	0.524	0.145	0.277	0.165	-0.144	0.466	0.076	0.309	0.143	0.452	-0.096	0.125	0.033	0.181	0.29	0.047	0.424	-0.138	0.146	-0.021	0.275	0.186	0.074	0.192	0.424	-0.119	-0.017	0.017
SDQ	Steals from home, school, work or elsewhere	0.56	0.605	0.002	0.375	0.485	0.006	-0.056	0.239	0.471	0.091	0.24	0.158	-0.196	0.436	0.033	0.271	0.154	0.429	-0.138	0.083	-0.016	0.194	0.268	0.002	0.404	-0.163	0.09	-0.022	0.254	0.195	0.027	0.163	0.405	-0.142	-0.04	-0.014
SDQ	Is considerate of other people’s feelings (R)	0.674	0.684	0.056	-0.027	0.626	0.402	-0.096	0.031	0.473	0.606	0.016	0.02	0.157	0.793	0.014	-0.01	0.033	0.783	0.245	-0.009	-0.019	0.027	0.004	-0.006	0.794	0.192	0.013	0.054	0.003	-0.009	-0.003	0.088	0.788	0.221	0.038	-0.038
SDQ	Shares readily with others (R)	0.576	0.535	0.121	-0.018	0.494	0.397	-0.02	-0.002	0.388	0.541	0.002	0.041	0.195	0.656	0.04	-0.038	0.049	0.655	0.277	0.017	-0.015	0.036	-0.035	-0.006	0.667	0.225	0.037	0.069	-0.034	-0.003	-0.006	0.096	0.66	0.247	0.063	-0.027
SDQ	Helpful if someone is hurt, upset, or feeling ill (R)	0.557	0.539	0.086	-0.171	0.52	0.46	-0.063	-0.009	0.298	0.664	-0.047	-0.031	0.282	0.714	-0.033	-0.066	-0.03	0.689	0.33	-0.083	0.029	-0.065	-0.036	0.022	0.717	0.305	-0.053	0.04	-0.034	-0.093	0.016	-0.017	0.711	0.325	0.035	-0.023
SDQ	Is kind to people younger than them (R)	0.457	0.398	0.134	-0.079	0.388	0.391	0.02	0	0.239	0.513	-0.014	0.023	0.249	0.533	-0.001	-0.051	0.03	0.528	0.312	-0.034	-0.011	-0.012	-0.017	-0.064	0.567	0.328	-0.018	0.036	-0.013	-0.043	-0.061	0.024	0.563	0.344	0.028	-0.018
SDQ	Often volunteers to help others (parents, teachers, peers, colleagues) (R)	0.464	0.464	0.054	-0.112	0.465	0.345	0.022	0.241	0.024	0.507	0.094	0.057	0.243	0.463	-0.215	0.137	0.051	0.404	0.235	-0.249	0.032	0.009	0.163	0.097	0.439	0.238	-0.222	0.057	0.155	-0.042	0.094	-0.118	0.441	0.267	0.001	-0.139
SDQ	Has at least one good friend (R)	0.478	0.186	0.427	0.047	0.166	0.532	0.373	0.02	0.057	0.414	0.051	0.252	0.411	0.191	0.029	-0.016	0.247	0.201	0.478	0.004	-0.032	0.136	0.054	-0.205	0.286	0.617	0.011	0.023	0.06	0.188	-0.246	-0.077	0.289	0.544	0.098	0.109
SDQ	Is generally liked by others (R)	0.555	0.243	0.464	0.091	0.21	0.569	0.396	0.021	0.123	0.444	0.027	0.316	0.396	0.276	0.031	-0.023	0.302	0.281	0.457	0.006	-0.005	0.191	0.064	-0.214	0.372	0.629	0.015	-0.027	0.069	0.231	-0.237	-0.046	0.375	0.58	0.03	0.097
	Factor correlations	F1	F1	F2	F1	F2	F3	F1	F2	F3	F4	F1	F2	F3	F4	F5	F1	F2	F3	F4	F5	F6	F1	F2	F3	F4	F5	F6	F7	F1	F2	F3	F4	F5	F6	F7	F8
	F1	1	1	0.401	1	0.038	0.235	1	0.182	0.322	0.023	1	0.405	-0.013	0.461	0.108	1	0.346	0.493	0.117	0.146	0.013	1	0.345	0.16	0.164	0.152	0.363	0.006	1	0.317	0.157	0.213	0.389	0.05	0.295	-0.047
	F2			1		1	0.105		1	0.561	0.151		1	0.064	0.253	0.26		1	0.19	0.141	0.262	0.254		1	0.161	0.423	0.06	0.265	0.277		1	0.257	0.3	0.143	0.273	0.152	0.071
	F3						1			1	0.138			1	0.112	-0.009			1	0.129	0.045	0.094			1	0.24	0.432	0.144	0.019			1	0.088	0.269	0.37	0.253	0.102
	F4										1				1	0.082				1	-0.026	0.295				1	0.071	0.189	0.229				1	0.103	0.018	0.128	0.21
	F5															1					1	-0.124					1	0.125	0.089					1	0.055	0.271	-0.004
	F6																					1						1	0.253						1	0.341	0.128
	F7																												1							1	0.062
	F8																																				1
	Fit indices	1-factor	2-factor		3-factor			4-factor				5-factor					6-factor						7-factor							8-factor
	CFI	0.495	0.619		0.739			0.809				0.859					0.891						0.91							0.927
	TLI	0.487	0.607		0.727			0.796				0.847					0.88						0.9							0.917
	RMSEA	0.056	0.049		0.041			0.035				0.031					0.027						0.025							0.023
	SRMR	0.12	0.096		0.072			0.059				0.047					0.041						0.037							0.032
Notes: Bold indicates primary loadings (≥0.35) with at least │0.10│ difference from the second largest loading in the same factor structure.
All items were scored in the direction of difficulties or reversed-coded where necessary, so that higher scores reflected more severe difficulties.
Abbreviations:
(R)=reversed item
AQ=Abbreviated Autism Spectrum Quotient
ARBQ=Anxiety‐related Behaviours Questionnaire
CFI=comparative fit index. Adequate when ≥0.90
CPRS=Conners Parent Rating Scale-Revised
ICUT=Inventory of Callous-Unemotional Traits
RMSEA=root mean square error of approximation. Adequate when ≤0.08D&E
SDQ=Strenghts and Difficulties Questionnaire
SMFQ=Short Moods and Feelings Questionnaire
SRMR=standardized root mean square residual. Adequate when ≤0.08
TFI=Tucker-Lewis index. Adequate when ≥0.90

## Sheet: ST8
Supplementary Table 8. Factor loadings, factor correlations and fit indices for models from 1 to 14 factors from the exploratory structural equation modelling analyses of self-reported neurodevelopmental and other psychiatric traits at age 16.
		1-factor	2-factor		3-factor			4-factor				5-factor					6-factor						7-factor							8-factor								9-factor									10-factor
Original measure	Item	p	Internaling/ Thought	Neurodevelopmental	Internalizing	Thought/ Externalizing	Neurodevelopmental	Inattention/ Dysregulation	Thought	Detachment	Internalizing	Inattention/ Dysregulation	Paranoia	Internalizing	Grandiosity/ Repetitive and restricted behaviors and interests	Detachment	Inattention/ Dysregulation	Paranoia	Internalizing	Grandiosity/ Antisocialily	Detachment	Repetitive and restricted behaviors and interests	Inattention/ Dysregulation	Paranoia	Anhedonia	Internalizing	Grandiosity/ Antisocialily	Repetitive and restricted behaviors and interests/Hallucinations	Social Difficulties	Inattention-Hyperactivity	Paranoia	Grandiosity/ Antisocialily	Distress/ Eating	Anhedonia	Fear	Repetitive and restricted behaviors and interests/Hallucinations	Social Difficulties	Inattention-Hyperactivity	Paranoia	Distress	Anhedonia/ Low Prosociality	Grandiosity	Hallucinations	Fear/Eating	Social Difficulties	Repetitive and restricted behaviors and interests	Paranoia	Inattention-Hyperactivity	Distress
SWAN	I pay close attention to detail and avoid careless mistakes (R)	0.302	0.01	0.551	0.027	0.076	0.543	0.619	-0.217	0.096	0.025	0.627	-0.097	0.053	-0.206	0.059	0.647	-0.107	0.11	-0.017	0.052	-0.061	0.647	-0.088	0.046	0.083	-0.145	-0.052	-0.018	0.471	-0.061	0.011	-0.016	0.399	0.126	-0.067	0.004	0.555	-0.067	0.021	0.11	-0.109	-0.01	0.001	0.009	-0.258	-0.07	0.537	0.017
SWAN	I sustain attention on tasks or leisure activities (R)	0.387	0.092	0.56	0.117	0.072	0.567	0.619	-0.224	0.15	0.101	0.633	-0.076	0.14	-0.236	0.062	0.667	-0.075	0.183	-0.087	0.065	-0.041	0.651	-0.061	0.021	0.153	-0.202	-0.039	0.025	0.526	-0.052	-0.068	0.068	0.362	0.097	-0.053	0.05	0.611	-0.049	0.079	0.091	-0.157	-0.028	0.003	0.054	-0.167	-0.046	0.603	0.042
SWAN	I listen when spoken to directly (R)	0.362	0.043	0.58	0.023	0.176	0.536	0.627	-0.123	0.108	-0.016	0.629	-0.02	0.015	-0.146	0.093	0.644	0.045	0.012	-0.055	0.072	0.043	0.645	0.04	-0.081	-0.003	-0.134	-0.044	0.088	0.547	0.048	-0.016	-0.053	0.255	0.01	-0.057	0.099	0.61	0.027	-0.089	0.128	-0.101	-0.065	-0.015	0.036	-0.06	0.04	0.588	-0.092
SWAN	I follow through on instructions and finish school work or chores (R)	0.377	0.033	0.619	0	0.211	0.564	0.691	-0.101	0.076	-0.049	0.693	-0.044	-0.001	-0.111	0.093	0.674	-0.031	0.042	0.086	0.079	-0.031	0.705	-0.031	0.122	-0.017	-0.087	0.072	-0.076	0.495	-0.006	0.082	-0.023	0.427	0.007	0.068	-0.066	0.6	-0.015	0.044	0.153	-0.07	0.096	-0.127	-0.084	-0.201	-0.024	0.596	0.041
SWAN	I am organised in my tasks and activities (R)	0.341	0.025	0.592	0.021	0.137	0.563	0.615	-0.142	0.152	-0.045	0.623	-0.055	0.038	-0.159	0.141	0.627	-0.046	0.055	0.013	0.129	-0.045	0.633	-0.042	0.167	-0.004	-0.153	0.077	-0.032	0.43	-0.016	0.013	-0.015	0.455	0.013	0.071	-0.014	0.534	-0.011	0.092	0.159	-0.129	0.1	-0.163	-0.014	-0.226	-0.02	0.538	0.078
SWAN	I engage in tasks that require sustained mental effort (R)	0.332	0.04	0.536	0.073	0.043	0.543	0.617	-0.26	0.09	0.105	0.633	-0.142	0.136	-0.234	0.016	0.663	-0.151	0.199	-0.066	0.023	-0.044	0.65	-0.133	-0.003	0.174	-0.183	-0.062	-0.007	0.512	-0.112	-0.044	0.034	0.369	0.164	-0.065	0.014	0.593	-0.121	0.042	0.075	-0.136	-0.024	0.071	0.032	-0.208	-0.118	0.582	0.003
SWAN	I keep track of things necessary for activities (R)	0.316	-0.014	0.603	0.012	0.061	0.6	0.62	-0.237	0.155	-0.009	0.633	-0.113	0.066	-0.23	0.116	0.671	-0.087	0.074	-0.093	0.103	-0.019	0.651	-0.075	0.053	0.035	-0.222	-0.006	0.032	0.492	-0.05	-0.068	-0.051	0.419	0.08	-0.013	0.054	0.583	-0.059	0.009	0.127	-0.183	0.016	-0.062	0.057	-0.205	-0.061	0.575	-0.015
SWAN	I ignore distractions that go on around me (R)	0.377	0.139	0.475	0.114	0.185	0.438	0.622	-0.102	0.018	0.117	0.622	-0.006	0.081	-0.126	-0.036	0.621	0.008	0.158	0.009	-0.039	-0.006	0.632	0.004	-0.017	0.125	-0.111	0.011	-0.079	0.535	0.004	-0.007	0.088	0.27	0.035	0.01	-0.07	0.616	0.001	0.085	0.017	-0.077	0.006	-0.018	-0.056	-0.088	0.002	0.615	0.03
SWAN	I remember to do daily activities (R)	0.321	0.045	0.527	0.043	0.127	0.502	0.563	-0.135	0.125	-0.001	0.571	-0.034	0.047	-0.156	0.096	0.603	0.034	0.028	-0.108	0.077	0.063	0.585	0.027	-0.027	-0.012	-0.204	0.039	0.055	0.498	0.036	-0.094	-0.063	0.287	0.007	0.037	0.071	0.564	0.021	-0.06	0.089	-0.183	0.047	-0.065	0.057	-0.07	0.022	0.558	-0.105
SWAN	I sit still (control movement of hands/ feet) (R)	0.398	0.195	0.408	0.107	0.332	0.312	0.577	0.066	-0.063	0.098	0.576	0.024	0.081	0.042	-0.061	0.542	0.133	0.09	0.014	-0.064	0.191	0.569	0.089	-0.224	0.05	-0.044	0.093	0.018	0.636	0.05	-0.047	0.109	-0.063	-0.173	0.099	0.02	0.678	0.046	0.033	-0.076	-0.022	-0.003	-0.12	0.009	0.266	0.073	0.708	-0.089
SWAN	I stay seated when required to (R)	0.451	0.061	0.652	-0.038	0.389	0.503	0.772	0.002	-0.084	-0.019	0.764	-0.018	-0.044	0.002	-0.026	0.731	0.158	-0.071	-0.034	-0.054	0.256	0.738	0.111	-0.366	-0.077	-0.062	-0.01	0.118	0.785	0.07	-0.028	-0.044	-0.046	-0.178	-0.002	0.105	0.809	0.031	-0.193	0.006	-0.038	-0.089	-0.061	0.017	0.268	0.068	0.797	-0.276
SWAN	I stop myself from moving about when it is inappropriate to do so (R)	0.485	0.081	0.676	-0.015	0.395	0.524	0.774	0.008	-0.046	-0.013	0.772	-0.024	-0.003	0.007	0.005	0.736	0.15	-0.042	-0.04	-0.013	0.264	0.747	0.098	-0.359	-0.05	-0.061	-0.003	0.159	0.79	0.057	-0.021	-0.025	-0.044	-0.167	0	0.151	0.819	0.023	-0.16	0.031	-0.026	-0.1	-0.067	0.058	0.268	0.059	0.811	-0.245
SWAN	When engaging in leisure activities, I keep noise levels reasonable (R)	0.326	0.023	0.518	-0.063	0.321	0.399	0.674	-0.021	-0.139	-0.004	0.655	0.01	-0.107	-0.023	-0.09	0.634	0.132	-0.076	0.013	-0.126	0.153	0.647	0.104	-0.266	-0.08	-0.047	-0.026	-0.024	0.656	0.077	-0.003	-0.043	0.03	-0.137	-0.019	-0.04	0.684	0.036	-0.167	-0.026	-0.038	-0.073	-0.03	-0.098	0.161	0.062	0.664	-0.221
SWAN	I can settle down and rest (control constant activity) (R)	0.423	0.09	0.587	0.019	0.315	0.478	0.701	-0.034	-0.045	0.041	0.695	0.002	0	-0.049	-0.035	0.684	0.14	-0.002	-0.064	-0.058	0.188	0.682	0.105	-0.287	-0.013	-0.109	-0.009	0.075	0.722	0.066	-0.073	0.015	0.013	-0.142	-0.011	0.071	0.761	0.044	-0.084	-0.024	-0.071	-0.101	-0.072	0.027	0.201	0.072	0.752	-0.16
SWAN	I am able to control how much I talk (R)	0.389	0.108	0.498	0.021	0.345	0.373	0.704	-0.02	-0.196	0.126	0.677	0.068	-0.071	-0.045	-0.201	0.666	0.182	0.011	-0.024	-0.235	0.148	0.662	0.156	-0.346	0.019	-0.067	-0.065	-0.076	0.722	0.12	-0.05	0.017	-0.032	-0.08	-0.067	-0.083	0.738	0.085	-0.149	-0.135	-0.046	-0.118	0.054	-0.099	0.177	0.12	0.714	-0.206
SWAN	I reflect on questions and control blurting out answers (R)	0.361	0.072	0.52	-0.022	0.348	0.391	0.712	-0.006	-0.175	0.059	0.686	0.058	-0.102	-0.026	-0.15	0.668	0.168	-0.035	0.013	-0.187	0.143	0.679	0.142	-0.329	-0.025	-0.03	-0.073	-0.043	0.706	0.118	0.009	-0.037	-0.009	-0.067	-0.083	-0.048	0.725	0.08	-0.187	-0.082	-0.009	-0.117	0.037	-0.079	0.123	0.11	0.7	-0.243
SWAN	I await my turn rather than queue jumping (R)	0.252	-0.039	0.518	-0.127	0.309	0.396	0.627	0.015	-0.095	-0.121	0.6	0.066	-0.211	-0.006	-0.005	0.573	0.16	-0.185	0.077	-0.056	0.09	0.606	0.139	-0.22	-0.161	0.04	-0.101	0.027	0.562	0.127	0.103	-0.109	0.051	-0.144	-0.106	0.008	0.581	0.087	-0.242	0.077	0.032	-0.133	-0.03	-0.108	0.083	0.115	0.551	-0.278
SWAN	I enter into conversations without interrupting (R)	0.329	0.081	0.469	0.014	0.273	0.381	0.589	-0.004	-0.043	0.019	0.566	0.112	-0.094	-0.061	-0.041	0.565	0.202	-0.061	-0.024	-0.078	0.088	0.568	0.187	-0.243	-0.042	-0.049	-0.097	0.04	0.576	0.167	-0.008	-0.033	0.029	-0.084	-0.108	0.037	0.595	0.143	-0.164	-0.001	-0.035	-0.14	0.007	-0.027	0.098	0.175	0.576	-0.213
SMFQ	I felt miserable or unhappy	0.648	0.632	0.077	0.683	0.008	0.103	0.042	0.049	0.345	0.513	0.037	0.388	0.432	-0.189	-0.013	-0.01	0.188	0.585	0.003	0.094	-0.352	-0.018	0.209	0.312	0.611	-0.01	-0.097	-0.002	-0.047	0.167	-0.024	0.7	0.146	0.035	-0.096	0.001	0.018	0.282	0.639	0.036	0.012	-0.099	0.063	0.016	-0.051	0.29	0.01	0.65
SMFQ	I didn’t enjoy anything at all	0.6	0.549	0.176	0.585	0.053	0.203	0.083	0.077	0.402	0.357	0.105	0.253	0.452	-0.088	0.156	-0.002	0.067	0.532	0.134	0.28	-0.299	0.044	0.066	0.378	0.54	0.108	-0.032	0.125	-0.055	0.029	0.133	0.673	0.165	-0.031	-0.023	0.12	0.022	0.131	0.608	0.245	0.112	-0.04	0.019	0.024	-0.008	0.133	0.021	0.611
SMFQ	I felt so tired I just sat around and did nothing	0.441	0.416	0.091	0.418	0.093	0.101	0.143	0.081	0.189	0.294	0.164	0.145	0.335	-0.014	0.033	0.108	0.068	0.392	0.06	0.106	-0.092	0.139	0.056	0.126	0.376	0.035	0.034	0.057	0.113	0.037	0.051	0.381	0.065	0.055	0.03	0.066	0.155	0.091	0.329	0.069	0.052	0.035	0.063	0.053	-0.001	0.086	0.154	0.324
SMFQ	I was very restless	0.518	0.522	0.01	0.471	0.207	0.008	0.174	0.196	0.101	0.354	0.185	0.219	0.34	0.076	-0.051	0.096	0.156	0.423	0.132	0.024	-0.053	0.148	0.127	0.097	0.391	0.094	0.106	-0.027	0.175	0.094	0.073	0.454	-0.04	-0.011	0.095	-0.017	0.224	0.152	0.383	-0.026	0.106	0.064	0.022	-0.007	0.119	0.154	0.255	0.344
SMFQ	I felt I was no good anymore	0.753	0.733	0.09	0.796	-0.025	0.122	0.038	0.025	0.407	0.607	0.034	0.426	0.514	-0.238	-0.015	-0.021	0.186	0.679	0.009	0.114	-0.406	-0.036	0.209	0.399	0.689	-0.032	-0.069	-0.026	-0.059	0.157	-0.053	0.82	0.175	0	-0.062	-0.02	0.016	0.294	0.757	0.025	-0.013	-0.062	0.024	0.017	-0.049	0.295	0.008	0.753
SMFQ	I cried a lot	0.565	0.588	-0.036	0.662	-0.091	-0.004	0.002	-0.043	0.23	0.596	-0.004	0.306	0.441	-0.232	-0.147	-0.028	0.091	0.641	-0.039	-0.038	-0.354	-0.065	0.119	0.272	0.665	-0.067	-0.102	-0.113	-0.076	0.082	-0.084	0.686	0.151	0.132	-0.097	-0.107	-0.02	0.188	0.652	-0.086	-0.021	-0.082	0.134	-0.011	-0.114	0.19	-0.036	0.687
SMFQ	I found it hard to think properly or concentrate	0.606	0.583	0.09	0.58	0.136	0.099	0.241	0.099	0.189	0.451	0.262	0.202	0.448	-0.027	-0.035	0.186	0.096	0.559	0.089	0.062	-0.129	0.22	0.077	0.173	0.527	0.025	0.075	-0.017	0.199	0.048	0.041	0.543	0.096	0.071	0.069	-0.001	0.265	0.124	0.495	0.006	0.055	0.072	0.054	0.032	-0.004	0.113	0.28	0.467
SMFQ	I hated myself	0.781	0.734	0.164	0.806	-0.03	0.198	0.051	0.012	0.483	0.579	0.052	0.423	0.535	-0.258	0.06	0.004	0.191	0.667	-0.023	0.192	-0.4	-0.014	0.214	0.412	0.677	-0.057	-0.072	0.053	-0.058	0.166	-0.063	0.795	0.216	0.003	-0.06	0.058	0.018	0.297	0.722	0.107	-0.046	-0.06	0.042	0.049	-0.045	0.3	0.01	0.707
SMFQ	I felt I was a bad person	0.701	0.671	0.113	0.708	0.056	0.132	0.105	0.078	0.354	0.515	0.1	0.409	0.44	-0.171	-0.001	0.045	0.225	0.581	0.022	0.104	-0.318	0.04	0.235	0.333	0.582	-0.02	-0.025	-0.02	-0.017	0.199	-0.014	0.67	0.195	0.028	-0.012	-0.02	0.056	0.3	0.605	0.071	-0.009	-0.011	0.064	-0.024	-0.043	0.302	0.052	0.611
SMFQ	I felt lonely	0.701	0.688	0.068	0.734	0.022	0.096	-0.042	0.101	0.41	0.518	-0.037	0.397	0.503	-0.144	0.052	-0.084	0.219	0.6	-0.024	0.167	-0.287	-0.092	0.227	0.316	0.605	-0.023	-0.018	0.077	-0.092	0.186	-0.052	0.683	0.098	0.029	-0.014	0.085	-0.039	0.303	0.63	0.057	-0.002	-0.022	0.042	0.097	-0.006	0.3	-0.038	0.615
SMFQ	I thought that nobody really loved me	0.725	0.699	0.102	0.736	0.051	0.129	0.063	0.093	0.387	0.525	0.06	0.424	0.467	-0.163	0.024	-0.018	0.214	0.607	0.067	0.143	-0.36	-0.006	0.228	0.369	0.619	0.038	-0.058	0.008	-0.062	0.187	0.033	0.736	0.165	0.005	-0.045	0.007	0.007	0.308	0.668	0.092	0.046	-0.041	0.038	-0.003	-0.054	0.306	0.001	0.66
SMFQ	I thought I could never be as good as others	0.705	0.691	0.067	0.751	-0.014	0.095	0.02	0.039	0.366	0.581	0.027	0.366	0.519	-0.194	-0.021	0.015	0.196	0.642	-0.09	0.088	-0.264	-0.013	0.211	0.239	0.645	-0.097	-0.037	0.039	0.011	0.171	-0.126	0.658	0.111	0.094	-0.029	0.053	0.059	0.274	0.577	-0.01	-0.073	-0.022	0.126	0.092	-0.011	0.275	0.055	0.561
SMFQ	I did everything wrong	0.712	0.681	0.116	0.729	0.027	0.14	0.112	0.045	0.361	0.547	0.12	0.351	0.502	-0.175	0.003	0.062	0.16	0.64	0.02	0.121	-0.311	0.062	0.17	0.322	0.638	-0.024	-0.027	0.006	0.028	0.128	-0.023	0.716	0.168	0.039	-0.022	0.015	0.104	0.24	0.655	0.049	0.002	-0.024	0.054	0.034	-0.038	0.24	0.102	0.652
CASI	I don’t want other people to know when I feel afraid	0.458	0.465	0.003	0.453	0.109	0.017	-0.039	0.177	0.229	0.287	-0.021	0.209	0.359	0.053	0.07	-0.086	0.135	0.381	0.059	0.148	-0.072	-0.056	0.108	0.168	0.366	0.073	0.088	0.093	-0.039	0.082	0.024	0.425	-0.016	-0.029	0.124	0.077	-0.003	0.105	0.23	0.169	0.017	0.063	0.204	-0.066	0.269	0.128	0.068	0.081
CASI	When I cannot keep my mind on my schoolwork, I worry that I might be going crazy	0.591	0.63	-0.099	0.6	0.15	-0.09	0.074	0.192	0.097	0.504	0.116	0.116	0.546	0.122	-0.087	0.014	0.044	0.618	0.124	0.03	0.003	0.076	0.015	0.02	0.573	0.118	0.127	0.039	0.06	0.013	0.129	0.399	-0.034	0.281	0.142	0.048	0.099	0.036	0.298	0.036	0.159	0.142	0.329	0.035	0.054	0.032	0.125	0.306
CASI	It scares me when I feel “shaky”	0.563	0.651	-0.26	0.674	-0.015	-0.227	-0.06	0.072	0.03	0.681	-0.02	0.097	0.607	0.007	-0.257	-0.023	0.033	0.705	-0.1	-0.153	0.039	-0.038	0.025	-0.13	0.665	-0.066	0.086	-0.029	-0.048	0.059	-0.053	0.245	0.025	0.549	0.14	-0.028	-0.032	0.03	0.114	-0.062	-0.009	0.169	0.635	0.001	-0.005	0.031	-0.014	0.146
CASI	It scares me when I feel like I am going to faint	0.399	0.498	-0.298	0.538	-0.087	-0.266	-0.068	-0.016	-0.07	0.628	-0.036	0.019	0.501	-0.036	-0.326	-0.012	-0.04	0.618	-0.128	-0.242	0.034	-0.044	-0.03	-0.196	0.592	-0.092	0.018	-0.086	-0.067	0.019	-0.071	0.112	0.046	0.604	0.085	-0.093	-0.063	-0.035	-0.012	-0.106	-0.036	0.131	0.689	-0.045	-0.065	-0.032	-0.054	0.03
CASI	It is important for me to stay in control of my feelings	0.328	0.414	-0.225	0.391	0.071	-0.215	-0.163	0.183	0.023	0.348	-0.146	0.123	0.342	0.122	-0.108	-0.215	0.06	0.398	0.077	-0.029	-0.015	-0.192	0.034	0.064	0.375	0.098	0.119	-0.038	-0.132	0.019	0.029	0.341	-0.126	0.095	0.152	-0.047	-0.121	0.027	0.203	-0.01	0.076	0.106	0.266	-0.085	0.22	0.037	-0.055	0.102
CASI	It scares me when my heart beats fast	0.504	0.587	-0.253	0.611	-0.03	-0.217	-0.04	0.043	0.002	0.637	0.021	-0.029	0.622	0.041	-0.232	-0.002	-0.085	0.702	-0.053	-0.118	0.07	0.023	-0.07	-0.252	0.664	0.018	-0.001	0.073	-0.059	0.005	0.075	0.083	0.032	0.696	0.069	0.061	-0.038	-0.059	-0.056	0.039	0.092	0.104	0.773	0.028	-0.065	-0.045	-0.022	0.023
CASI	I feel embarrassed when my stomach rumbles or makes noise	0.363	0.419	-0.145	0.499	-0.137	-0.113	-0.127	-0.053	0.114	0.504	-0.093	0.054	0.465	-0.107	-0.147	-0.027	0.007	0.505	-0.226	-0.081	0.019	-0.08	0.021	-0.127	0.487	-0.172	0.002	0.055	-0.01	0.029	-0.199	0.185	-0.018	0.387	0.025	0.073	-0.025	0.028	0.088	-0.113	-0.127	0.067	0.426	0.149	-0.016	0.023	-0.024	0.063
CASI	It scares me when I feel like I am going to throw up	0.384	0.473	-0.261	0.517	-0.084	-0.233	-0.069	-0.015	-0.04	0.589	-0.033	0.009	0.493	-0.033	-0.283	-0.005	-0.038	0.585	-0.137	-0.204	0.052	-0.031	-0.027	-0.216	0.557	-0.093	0.013	-0.036	-0.018	0.01	-0.088	0.114	-0.007	0.554	0.064	-0.033	-0.019	-0.035	-0.017	-0.114	-0.036	0.102	0.634	0.019	-0.028	-0.029	-0.009	0.009
CASI	When I notice that my heart is beating fast, I worry that there might be something wrong with me	0.505	0.588	-0.263	0.604	-0.016	-0.23	-0.045	0.061	-0.009	0.63	0.025	-0.058	0.637	0.075	-0.223	-0.006	-0.098	0.698	-0.042	-0.108	0.11	0.03	-0.085	-0.29	0.652	0.036	0.016	0.099	-0.057	-0.001	0.099	0.031	0.013	0.721	0.092	0.088	-0.039	-0.074	-0.106	0.053	0.114	0.124	0.791	0.046	-0.06	-0.059	-0.026	-0.003
CASI	It scares me when I have trouble getting my breath	0.453	0.543	-0.267	0.562	-0.019	-0.243	-0.047	0.053	-0.036	0.605	-0.004	0.02	0.539	0.032	-0.266	-0.004	-0.018	0.621	-0.085	-0.176	0.085	-0.008	-0.02	-0.209	0.579	-0.045	0.068	-0.022	-0.026	0.027	-0.024	0.111	0.002	0.578	0.125	-0.024	-0.017	-0.025	-0.018	-0.066	0.012	0.159	0.657	0.001	-0.018	-0.021	-0.001	0.023
CASI	When my stomach hurts, I worry that I might be really ill	0.441	0.52	-0.236	0.517	0.036	-0.219	-0.029	0.102	-0.031	0.533	0.023	-0.005	0.522	0.097	-0.208	-0.005	-0.026	0.574	-0.024	-0.117	0.121	0.025	-0.029	-0.248	0.529	0.031	0.063	0.051	-0.003	0.023	0.064	0.055	-0.047	0.569	0.111	0.051	0.004	-0.034	-0.072	-0.01	0.096	0.134	0.637	0.039	-0.004	-0.025	0.015	0.001
CASI	It scares me when I cannot concentrate on my schoolwork	0.473	0.546	-0.201	0.538	0.064	-0.188	-0.041	0.14	0.027	0.508	-0.002	0.073	0.503	0.095	-0.159	-0.083	-0.007	0.593	0.08	-0.048	-0.011	-0.038	-0.018	-0.044	0.564	0.103	0.065	0.008	-0.016	-0.018	0.087	0.352	-0.097	0.325	0.079	0.017	0.005	-0.003	0.253	-0.044	0.153	0.077	0.38	0.038	0.051	0.001	0.03	0.278
CASI	Others my age can tell when I feel shaky	0.316	0.402	-0.242	0.376	0.07	-0.241	-0.009	0.116	-0.112	0.423	0.003	0.078	0.316	0.083	-0.253	-0.033	0.044	0.415	0.034	-0.192	0.04	-0.029	0.021	-0.062	0.378	0.019	0.125	-0.153	-0.005	0.031	0.006	0.189	-0.046	0.274	0.151	-0.151	0.007	0.018	0.131	-0.142	0.05	0.156	0.317	-0.084	0.031	0.014	0.028	0.155
CASI	Unusual feelings in my body scare me	0.553	0.658	-0.358	0.663	-0.013	-0.315	-0.088	0.086	-0.056	0.714	-0.025	-0.008	0.658	0.081	-0.303	-0.039	-0.041	0.735	-0.08	-0.191	0.134	-0.026	-0.036	-0.305	0.679	-0.003	0.066	0.029	-0.106	0.06	0.05	0.031	0.028	0.746	0.158	-0.001	-0.087	-0.028	-0.12	0.014	0.059	0.186	0.848	-0.042	-0.016	-0.006	-0.071	0.015
CASI	When I am afraid, I worry that I might be crazy	0.659	0.706	-0.126	0.691	0.121	-0.105	-0.022	0.206	0.17	0.565	0.034	0.128	0.648	0.128	-0.05	-0.052	0.067	0.681	0.056	0.077	0.041	0.004	0.039	-0.026	0.632	0.092	0.135	0.134	-0.037	0.058	0.117	0.338	-0.022	0.409	0.164	0.139	-0.002	0.06	0.224	0.105	0.146	0.162	0.473	0.084	0.054	0.062	0.025	0.271
CASI	I get scared when I feel nervous	0.516	0.573	-0.152	0.625	-0.057	-0.122	-0.08	0.027	0.133	0.592	-0.028	0.058	0.598	-0.029	-0.14	-0.017	-0.002	0.649	-0.134	-0.039	0.03	-0.028	0.002	-0.125	0.616	-0.083	0.04	0.091	0.031	0.008	-0.101	0.29	-0.054	0.432	0.059	0.112	0.037	0.012	0.172	-0.072	-0.019	0.076	0.481	0.161	0.031	0.013	0.057	0.157
CASI	I don’t like to let my feelings show	0.478	0.468	0.052	0.493	0.041	0.078	-0.05	0.114	0.311	0.307	-0.014	0.144	0.446	0.011	0.13	-0.077	0.046	0.455	0.042	0.228	-0.103	-0.052	0.02	0.228	0.441	0.053	0.077	0.151	-0.042	-0.012	0	0.519	0.024	-0.05	0.131	0.127	0.003	0.012	0.278	0.254	-0.023	0.054	0.251	-0.068	0.329	0.041	0.086	0.083
CASI	Funny feelings in my body scare me	0.576	0.671	-0.333	0.682	-0.026	-0.284	-0.092	0.075	-0.013	0.714	-0.019	-0.029	0.695	0.074	-0.264	-0.027	-0.057	0.75	-0.101	-0.148	0.148	-0.011	-0.047	-0.327	0.692	-0.01	0.051	0.091	-0.105	0.057	0.053	0.001	0.042	0.779	0.147	0.066	-0.081	-0.037	-0.156	0.065	0.056	0.169	0.881	-0.002	-0.012	-0.011	-0.064	-0.011
O-LIFE	Are there very few things that you have ever enjoyed doing?	0.305	0.253	0.158	0.257	0.074	0.169	0.126	0.059	0.215	0.114	0.175	-0.034	0.309	0.055	0.171	0.073	-0.1	0.305	0.156	0.254	-0.065	0.155	-0.106	0.099	0.301	0.162	-0.025	0.215	0.064	-0.111	0.214	0.271	0.046	0.077	-0.025	0.216	0.1	-0.076	0.212	0.246	0.182	-0.019	0.095	0.107	-0.026	-0.077	0.093	0.219
O-LIFE	Are you too independent to get involved with other people?	0.389	0.318	0.217	0.324	0.092	0.237	-0.107	0.184	0.454	0.014	-0.035	0.028	0.398	0.132	0.41	-0.116	0.021	0.232	0.06	0.491	0.049	-0.031	-0.001	0.096	0.211	0.14	0.068	0.479	-0.044	-0.013	0.148	0.217	-0.091	-0.011	0.047	0.494	-0.032	0.04	0.177	0.331	0.158	0.017	-0.024	0.343	0.103	0.034	-0.021	0.15
O-LIFE	Do you feel very close to your friends? (R)	0.461	0.351	0.33	0.408	0.02	0.354	-0.117	0.103	0.595	0.064	-0.077	0.212	0.356	-0.061	0.436	-0.079	0.171	0.214	-0.118	0.495	-0.074	-0.06	0.172	0.171	0.227	-0.025	-0.034	0.48	-0.093	0.157	-0.009	0.253	0.055	-0.019	-0.051	0.492	-0.072	0.224	0.221	0.341	-0.007	-0.077	-0.029	0.341	0.039	0.228	-0.081	0.225
O-LIFE	Has dancing or the idea of dancing always seemed dull to you?	0.033	-0.08	0.319	-0.084	0.065	0.322	-0.009	0.067	0.334	-0.309	0.039	-0.089	0.046	0.078	0.444	0.013	-0.025	-0.162	0.016	0.445	0.097	0.069	-0.041	0.059	-0.178	0.058	0.042	0.416	0.01	-0.036	0.104	-0.118	0.013	-0.135	0.026	0.42	0.024	-0.039	-0.119	0.368	0.048	-0.023	-0.136	0.228	0.101	-0.035	0.042	-0.162
O-LIFE	Is trying new foods something you enjoy? (R)	0.154	0.071	0.242	0.123	-0.041	0.259	0.063	-0.06	0.283	-0.013	0.102	-0.054	0.187	-0.068	0.246	0.094	-0.079	0.118	-0.033	0.282	-0.045	0.102	-0.083	0.142	0.116	-0.033	-0.007	0.228	-0.001	-0.079	0.029	0.099	0.175	0.023	0.012	0.225	0.027	-0.072	0.068	0.288	-0.042	0.016	0.056	0.092	-0.021	-0.078	0.033	0.024
O-LIFE	Do you often feel uncomfortable when your friends touch you?	0.328	0.26	0.208	0.272	0.069	0.222	-0.032	0.114	0.366	0.038	0.03	0.003	0.343	0.077	0.321	-0.015	0.012	0.204	0.001	0.382	0.066	0.047	-0.001	0.011	0.185	0.068	0.034	0.41	0.026	-0.002	0.091	0.115	-0.044	0.066	0.022	0.424	0.04	0.02	0.06	0.278	0.093	-0.004	0.071	0.29	0.081	0.021	0.055	0.024
O-LIFE	Do you prefer watching television to going out with friends?	0.338	0.244	0.275	0.311	-0.033	0.301	-0.172	0.067	0.516	0.023	-0.07	-0.09	0.465	0.057	0.445	-0.083	-0.061	0.237	-0.104	0.517	0.125	-0.023	-0.057	-0.066	0.215	0.023	0.002	0.608	0	-0.054	0.04	0.06	-0.118	0.143	-0.034	0.641	-0.011	-0.01	0.059	0.277	0.093	-0.042	0.041	0.547	0.016	-0.019	-0.023	0.065
SPEQ	“I need to be on my guard against others”	0.568	0.569	0.021	0.429	0.379	0.005	-0.018	0.449	0.233	0.151	-0.059	0.58	0.099	0.125	0.081	-0.082	0.587	0.089	0.009	0.08	0.009	-0.047	0.552	0.015	0.09	0.074	0.087	0.104	-0.046	0.549	0.052	0.095	-0.061	0.004	0.086	0.102	-0.046	0.571	0.024	0.069	0.054	0.083	0.04	0.029	0.077	0.57	-0.027	0.003
SPEQ	“There might be negative comments being spread about me”	0.704	0.709	0.008	0.547	0.442	-0.018	-0.001	0.508	0.247	0.25	-0.067	0.805	0.029	-0.001	-0.039	-0.013	0.786	0.096	-0.133	-0.072	-0.054	-0.029	0.763	-0.049	0.126	-0.051	-0.001	0.011	0.013	0.754	-0.091	0.104	-0.032	0.043	-0.007	0.012	0.009	0.787	0.033	-0.085	-0.057	0.005	0.058	0.017	0.02	0.789	0.02	0.01
SPEQ	“People are deliberately trying to irritate me”	0.594	0.577	0.071	0.408	0.438	0.047	0.066	0.473	0.227	0.117	0.012	0.678	-0.006	0.079	0.056	0.014	0.689	0.009	-0.02	0.027	-0.01	0.041	0.657	-0.024	0.024	0.041	0.038	0.069	0.04	0.653	0.028	0.046	-0.033	-0.024	0.027	0.068	0.044	0.676	-0.015	0.025	0.027	0.027	-0.01	0.013	0.041	0.679	0.057	-0.034
SPEQ	“I might be being observed or followed”	0.584	0.606	-0.039	0.448	0.408	-0.063	0.019	0.471	0.148	0.208	-0.019	0.558	0.125	0.171	0.004	-0.039	0.591	0.121	0.008	0	0.087	-0.016	0.54	-0.003	0.089	0.038	0.197	0.012	-0.015	0.545	0.028	0.047	-0.041	0.056	0.204	0.015	-0.023	0.56	0.007	-0.006	0.022	0.228	0.048	0.001	0.03	0.538	-0.018	-0.005
SPEQ	“People are trying to upset me”	0.727	0.718	0.05	0.542	0.47	0.022	0.002	0.533	0.292	0.208	-0.067	0.823	0.025	0.006	0.016	-0.024	0.807	0.072	-0.121	-0.017	-0.062	-0.028	0.784	-0.038	0.107	-0.029	-0.015	0.063	-0.01	0.779	-0.054	0.085	-0.021	0.044	-0.027	0.065	-0.009	0.818	0.038	-0.042	-0.023	-0.018	0.027	0.055	-0.011	0.824	-0.008	0.05
SPEQ	“People are looking at me in an unfriendly way”	0.723	0.721	0.027	0.55	0.461	-0.002	0.016	0.521	0.258	0.24	-0.047	0.798	0.045	0.014	-0.021	0.009	0.794	0.092	-0.144	-0.057	-0.018	-0.006	0.765	-0.066	0.112	-0.064	0.031	0.031	0.015	0.766	-0.086	0.047	-0.007	0.086	0.028	0.034	0.009	0.791	-0.01	-0.065	-0.064	0.052	0.077	0.037	-0.013	0.789	0.01	-0.011
SPEQ	“People are being hostile towards me”	0.701	0.685	0.069	0.476	0.52	0.033	0.037	0.568	0.267	0.134	-0.036	0.831	-0.048	0.042	0.035	0.004	0.84	-0.018	-0.096	-0.014	-0.026	0.005	0.807	-0.031	0.005	-0.021	0.032	0.045	0.013	0.804	-0.04	0.019	-0.012	-0.014	0.021	0.044	0.013	0.83	-0.031	-0.018	-0.035	0.029	-0.016	0.01	0.019	0.835	0.015	-0.016
SPEQ	“Bad things are being said about me behind my back”	0.754	0.752	0.026	0.577	0.473	-0.004	0.006	0.535	0.273	0.257	-0.068	0.881	-0.004	-0.051	-0.055	0.012	0.854	0.081	-0.184	-0.101	-0.082	-0.022	0.835	-0.051	0.122	-0.098	-0.033	-0.008	0.018	0.827	-0.137	0.098	0.002	0.049	-0.04	-0.006	0.015	0.865	0.04	-0.116	-0.099	-0.021	0.044	0.019	-0.018	0.868	0.02	0.027
SPEQ	“Someone has bad intentions towards me”	0.742	0.737	0.037	0.474	0.606	-0.008	0.083	0.647	0.209	0.129	0.001	0.872	-0.08	0.099	-0.009	-0.001	0.872	-0.014	0.006	-0.054	-0.05	0.026	0.835	-0.008	0.011	0.067	0.039	-0.023	-0.006	0.836	0.059	0.037	-0.002	-0.01	0.036	-0.033	0.003	0.859	-0.013	-0.009	0.045	0.05	-0.007	-0.079	-0.006	0.862	0.009	0.005
SPEQ	“Someone has it in for me”	0.702	0.692	0.053	0.437	0.589	0.003	0.114	0.617	0.188	0.109	0.035	0.831	-0.092	0.102	-0.002	0.025	0.835	-0.028	0.026	-0.047	-0.048	0.057	0.799	-0.007	-0.004	0.078	0.035	-0.024	0.019	0.799	0.078	0.032	0.004	-0.021	0.028	-0.033	0.032	0.821	-0.014	0.002	0.059	0.037	-0.02	-0.084	-0.005	0.826	0.035	0.019
SPEQ	“People would harm me if given an opportunity”	0.678	0.65	0.107	0.405	0.581	0.062	0.129	0.601	0.23	0.054	0.065	0.746	-0.04	0.169	0.102	0.023	0.773	-0.035	0.08	0.07	0.006	0.078	0.723	0.043	-0.036	0.117	0.116	0.053	0.008	0.727	0.139	0.014	0.019	-0.049	0.112	0.044	0.028	0.744	-0.022	0.111	0.094	0.112	-0.051	-0.056	0.021	0.739	0.031	0.015
SPEQ	“People might be conspiring against me”	0.718	0.705	0.064	0.454	0.589	0.018	0.086	0.629	0.229	0.101	0.017	0.797	-0.026	0.157	0.063	-0.008	0.82	-0.01	0.038	0.029	0.007	0.035	0.773	0.011	-0.008	0.089	0.11	0.039	-0.012	0.778	0.098	0.009	-0.006	-0.006	0.102	0.036	-0.002	0.805	-0.008	0.041	0.078	0.116	-0.047	-0.016	-0.017	0.795	-0.005	0.034
SPEQ	“People are laughing at me”	0.691	0.686	0.039	0.568	0.368	0.023	-0.04	0.443	0.312	0.264	-0.093	0.72	0.13	-0.007	0.03	-0.034	0.711	0.149	-0.174	0.013	-0.021	-0.059	0.686	-0.015	0.158	-0.097	0.052	0.082	-0.019	0.681	-0.128	0.111	-0.008	0.069	0.047	0.091	-0.023	0.721	0.073	-0.049	-0.091	0.06	0.043	0.103	0.006	0.715	-0.019	0.067
SPEQ	“I am under threat from others”	0.719	0.701	0.082	0.46	0.574	0.039	0.045	0.625	0.277	0.084	-0.024	0.804	-0.017	0.144	0.106	-0.038	0.829	-0.023	0.006	0.071	0.008	-0.001	0.783	0.017	-0.018	0.072	0.104	0.087	-0.042	0.787	0.076	0.004	-0.009	-0.018	0.097	0.083	-0.033	0.81	-0.026	0.078	0.056	0.099	-0.036	0.003	0.021	0.805	-0.029	0.015
SPEQ	“I can detect coded messages about me in the press/TV/internet”	0.485	0.517	-0.069	0.349	0.412	-0.1	0.085	0.447	0.032	0.171	0.043	0.497	0.049	0.201	-0.059	-0.023	0.509	0.097	0.134	-0.058	0.037	0.03	0.464	0.006	0.078	0.143	0.146	-0.071	-0.004	0.469	0.147	0.066	-0.042	0.042	0.15	-0.076	-0.004	0.483	0.024	-0.01	0.126	0.183	0.044	-0.093	-0.013	0.466	-0.011	0.049
SPEQ	When something exciting is coming up in my life, I really look forward to it (R)	0.162	-0.02	0.511	0.01	0.048	0.521	0.069	0.025	0.538	-0.315	0.095	0.067	0.04	-0.057	0.574	0.056	0.046	-0.124	0.027	0.587	-0.121	0.073	0.01	0.463	-0.125	-0.003	0.079	0.348	-0.157	0.01	0.107	0.106	0.366	-0.269	0.111	0.323	-0.093	0.024	0.113	0.625	-0.076	0.068	-0.193	0.004	0.045	0.019	-0.084	0.1
SPEQ	When I think about eating my favourite food, I can almost taste how good it is (R)	-0.012	-0.154	0.4	-0.073	-0.107	0.42	0.045	-0.145	0.393	-0.251	0.038	0.058	-0.087	-0.207	0.384	0.036	-0.033	-0.124	-0.017	0.383	-0.281	-0.005	-0.046	0.531	-0.079	-0.071	-0.044	0.109	-0.25	-0.05	0.023	0.181	0.468	-0.261	0.024	0.062	-0.185	-0.048	0.149	0.528	-0.178	-0.003	-0.085	-0.23	0.009	-0.043	-0.148	0.061
SPEQ	I don’t look forward to things like eating out at restaurants	0.267	0.168	0.287	0.187	0.057	0.3	0.066	0.052	0.363	-0.035	0.102	0.046	0.208	-0.008	0.326	0.06	0.018	0.121	0.027	0.37	-0.052	0.089	-0.006	0.232	0.109	0.021	0.059	0.264	-0.026	-0.011	0.08	0.18	0.172	-0.071	0.076	0.257	0.015	0.006	0.127	0.376	-0.01	0.056	0.001	0.063	0.062	0.004	0.032	0.089
SPEQ	When I’m on my way to an amusement park, I can hardly wait to ride the roller coasters (R)	0.072	-0.021	0.27	0.028	-0.048	0.287	-0.076	-0.022	0.362	-0.16	-0.05	0.004	0.081	-0.06	0.36	-0.047	-0.005	-0.046	-0.063	0.375	-0.056	-0.058	-0.021	0.254	-0.043	-0.052	0.037	0.266	-0.175	-0.017	0.002	0.04	0.198	-0.104	0.064	0.254	-0.149	-0.013	0.049	0.374	-0.087	0.035	-0.057	0.067	0.035	-0.016	-0.136	0.031
SPEQ	I get so excited the night before a major holiday I can hardly sleep (R)	0.003	-0.14	0.404	-0.108	-0.003	0.414	-0.04	0.001	0.438	-0.364	-0.033	0.066	-0.086	-0.067	0.498	-0.043	0.057	-0.24	-0.013	0.485	-0.118	-0.053	0.029	0.429	-0.23	-0.033	0.062	0.263	-0.236	0.029	0.043	0.021	0.309	-0.302	0.093	0.237	-0.191	0.037	0.053	0.517	-0.114	0.045	-0.229	-0.035	0.058	0.035	-0.172	0.03
SPEQ	When I think of something tasty, like a chocolate biscuit, I have to have one (R)	-0.113	-0.191	0.224	-0.13	-0.117	0.243	-0.145	-0.08	0.299	-0.268	-0.157	0.059	-0.132	-0.128	0.32	-0.148	0.003	-0.2	-0.039	0.308	-0.198	-0.197	-0.01	0.446	-0.165	-0.059	0.005	0.084	-0.354	-0.016	-0.02	0.087	0.303	-0.271	0.06	0.046	-0.323	-0.013	0.094	0.393	-0.158	0.026	-0.136	-0.175	0.052	-0.011	-0.294	0.037
SPEQ	Looking forward to a pleasurable experience is in itself pleasurable (R)	0.042	-0.137	0.489	-0.087	-0.023	0.501	0.101	-0.075	0.453	-0.334	0.112	0.031	-0.063	-0.132	0.495	0.105	0.001	-0.184	-0.011	0.487	-0.16	0.095	-0.023	0.449	-0.167	-0.057	0.02	0.248	-0.148	-0.019	0.058	0.051	0.427	-0.257	0.071	0.214	-0.087	-0.026	0.038	0.587	-0.147	0.04	-0.136	-0.099	0.02	-0.027	-0.07	-0.012
SPEQ	I look forward to a lot of things in my life (R)	0.323	0.128	0.555	0.213	-0.027	0.579	0.11	-0.061	0.639	-0.124	0.133	0.16	0.164	-0.207	0.534	0.145	0.096	0.047	-0.102	0.56	-0.202	0.12	0.079	0.473	0.056	-0.132	0.011	0.351	-0.098	0.071	-0.023	0.242	0.448	-0.192	0.045	0.332	-0.025	0.102	0.21	0.592	-0.195	0.019	-0.095	0.039	0.009	0.104	-0.031	0.194
SPEQ	When ordering something off a menu, I imagine how good it will taste (R)	0.028	-0.126	0.441	-0.046	-0.093	0.463	0.049	-0.129	0.447	-0.259	0.047	0.07	-0.058	-0.203	0.434	0.036	-0.024	-0.109	-0.011	0.44	-0.287	0.002	-0.039	0.558	-0.064	-0.062	-0.041	0.157	-0.26	-0.043	0.04	0.198	0.485	-0.263	0.027	0.112	-0.191	-0.034	0.172	0.574	-0.168	0.002	-0.099	-0.196	-0.005	-0.033	-0.154	0.075
SPEQ	When I hear about a new movie starring my favourite actor, I can’t wait to see it (R)	-0.015	-0.149	0.376	-0.136	0.028	0.381	0.082	-0.019	0.322	-0.33	0.08	0.048	-0.129	-0.068	0.393	0.06	0.034	-0.226	0.033	0.375	-0.124	0.06	0.011	0.367	-0.209	-0.004	0.022	0.171	-0.136	0.013	0.08	0.014	0.32	-0.269	0.064	0.138	-0.084	0.005	0.009	0.47	-0.089	0.025	-0.163	-0.125	0.046	0.009	-0.057	-0.049
SPEQ	Are you easily confused if too much happens at the same time?	0.48	0.472	0.034	0.489	0.062	0.044	0.294	-0.015	0.04	0.478	0.345	-0.055	0.499	-0.011	-0.131	0.318	-0.085	0.572	-0.007	-0.047	0.062	0.349	-0.091	-0.147	0.521	-0.04	0.052	0.038	0.377	-0.094	-0.009	0.275	0.002	0.32	0.042	0.07	0.408	-0.073	0.211	-0.105	0.039	0.081	0.263	0.167	-0.057	-0.088	0.414	0.162
SPEQ	Do you frequently have difficulty in starting to do things?	0.51	0.453	0.178	0.453	0.127	0.185	0.296	0.052	0.197	0.325	0.343	0.033	0.438	0.002	0.056	0.303	0.009	0.452	0.019	0.128	0.034	0.343	-0.013	0.018	0.395	-0.033	0.113	0.118	0.338	-0.024	0.008	0.305	0.068	0.129	0.094	0.148	0.388	0.016	0.268	0.038	0.013	0.105	0.069	0.17	0.001	0.003	0.404	0.225
SPEQ	Are you a person whose mood goes up and down easily?	0.579	0.564	0.067	0.576	0.092	0.08	0.197	0.072	0.189	0.461	0.212	0.233	0.416	-0.071	-0.061	0.162	0.118	0.541	0.037	0.028	-0.151	0.189	0.119	0.078	0.542	0.026	-0.043	0.024	0.174	0.096	0.035	0.49	0.064	0.147	-0.047	0.035	0.222	0.152	0.37	0.024	0.053	-0.035	0.208	0.026	0	0.162	0.219	0.366
SPEQ	Do you dread going into a room by yourself where other people have already gathered and are talking?	0.503	0.478	0.1	0.578	-0.112	0.135	-0.101	-0.03	0.399	0.415	-0.028	0.026	0.606	-0.099	0.141	0.041	0.015	0.513	-0.275	0.218	0.084	0.016	0.023	-0.109	0.477	-0.19	0.03	0.355	0.098	0.021	-0.198	0.204	-0.036	0.317	0.021	0.394	0.085	0.055	0.136	0.039	-0.12	0.051	0.277	0.422	-0.003	0.039	0.083	0.074
SPEQ	Do you find it difficult to keep interested in the same thing for a long time?	0.38	0.312	0.198	0.277	0.178	0.19	0.45	0.029	0.042	0.216	0.484	-0.046	0.283	0.033	-0.006	0.41	-0.067	0.343	0.141	0.051	0.021	0.482	-0.084	-0.029	0.3	0.065	0.049	0.034	0.429	-0.09	0.132	0.233	0.082	0.098	0.032	0.052	0.488	-0.071	0.18	0.049	0.1	0.047	0.065	0.048	-0.026	-0.077	0.504	0.124
SPEQ	Do you often have difficulties in controlling your thoughts?	0.608	0.599	0.046	0.559	0.209	0.045	0.234	0.182	0.135	0.428	0.266	0.152	0.473	0.088	-0.033	0.187	0.113	0.526	0.093	0.056	0.028	0.239	0.075	0.043	0.468	0.047	0.166	0.033	0.242	0.06	0.064	0.39	0.008	0.143	0.161	0.053	0.287	0.103	0.323	0.002	0.082	0.167	0.132	0.076	0.041	0.086	0.3	0.297
SPEQ	Are you easily distracted from work by daydreams?	0.484	0.446	0.12	0.394	0.223	0.109	0.453	0.084	-0.007	0.347	0.481	0.012	0.357	0.065	-0.097	0.421	0.014	0.427	0.103	-0.04	0.09	0.474	-0.021	-0.063	0.355	0.009	0.157	-0.044	0.464	-0.026	0.06	0.242	0.054	0.152	0.143	-0.017	0.513	-0.004	0.205	-0.073	0.053	0.176	0.079	0.059	-0.032	-0.028	0.523	0.147
SPEQ	Do you ever feel that your speech is difficult to understand because the words are all mixed up and don’t make sense?	0.509	0.497	0.051	0.454	0.194	0.052	0.164	0.186	0.145	0.316	0.213	0.047	0.455	0.144	0.047	0.145	0.058	0.428	0.069	0.124	0.133	0.204	0.014	-0.03	0.357	0.05	0.204	0.136	0.24	0.003	0.057	0.257	-0.071	0.127	0.192	0.163	0.262	0.031	0.194	0.031	0.081	0.196	0.106	0.17	0.086	0.011	0.282	0.139
SPEQ	Are you easily distracted when you read or talk to someone?	0.483	0.444	0.12	0.398	0.209	0.11	0.452	0.068	-0.006	0.359	0.49	-0.03	0.39	0.069	-0.095	0.422	-0.032	0.458	0.112	-0.028	0.095	0.487	-0.061	-0.107	0.392	0.035	0.122	-0.003	0.493	-0.072	0.079	0.266	0.009	0.164	0.104	0.024	0.542	-0.059	0.176	-0.046	0.08	0.121	0.151	0.063	0.031	-0.066	0.555	0.127
SPEQ	Is it hard for you to make decisions?	0.483	0.47	0.057	0.553	-0.08	0.085	0.086	-0.08	0.224	0.491	0.132	0.047	0.52	-0.147	-0.044	0.188	0.003	0.548	-0.209	0.027	0.006	0.148	0.007	-0.053	0.511	-0.209	0.037	0.106	0.219	-0.006	-0.211	0.314	0.046	0.263	0.029	0.14	0.239	0.028	0.251	-0.083	-0.146	0.049	0.24	0.225	-0.004	0.022	0.242	0.222
SPEQ	When in a crowded room, do you often have difficulty in following a conversation?	0.483	0.431	0.167	0.458	0.063	0.181	0.133	0.054	0.288	0.295	0.21	-0.051	0.53	0.041	0.158	0.194	-0.031	0.442	-0.067	0.236	0.143	0.236	-0.051	-0.1	0.381	-0.044	0.113	0.312	0.266	-0.052	-0.012	0.177	-0.035	0.228	0.091	0.35	0.281	-0.026	0.131	0.09	0.024	0.106	0.157	0.348	0.014	-0.046	0.29	0.08
SPEQ	Hear noises or sounds when there is nothing about to explain them?	0.549	0.589	-0.113	0.433	0.391	-0.131	0.119	0.427	-0.003	0.282	0.133	0.19	0.352	0.347	-0.018	0.1	0.338	0.232	0.016	-0.001	0.404	0.096	0.205	0.043	0.096	-0.059	0.585	-0.077	0.083	0.228	-0.02	-0.043	0.038	0.141	0.61	-0.05	0.06	0.216	-0.001	-0.029	-0.066	0.665	0.047	0.027	-0.026	0.122	0.047	-0.096
SPEQ	Feel that someone is touching you, but when you look nobody is there?	0.634	0.679	-0.131	0.512	0.424	-0.149	0.11	0.474	0.016	0.337	0.125	0.229	0.412	0.373	-0.018	0.08	0.374	0.292	0.023	0.011	0.409	0.075	0.231	0.079	0.151	-0.056	0.617	-0.082	0.059	0.251	-0.018	0.019	0.045	0.148	0.639	-0.054	0.039	0.248	0.057	-0.02	-0.06	0.686	0.062	0.024	-0.022	0.153	0.023	-0.021
SPEQ	Hear sounds or music that people near you don’t hear?	0.6	0.647	-0.136	0.45	0.469	-0.158	0.105	0.52	-0.005	0.264	0.12	0.206	0.374	0.435	0.017	0.061	0.379	0.22	0.059	0.038	0.46	0.067	0.222	0.094	0.064	-0.025	0.676	-0.076	0.051	0.243	0.014	-0.033	0.022	0.093	0.693	-0.046	0.031	0.238	0.035	-0.007	-0.035	0.73	-0.019	0.028	-0.001	0.137	0.019	-0.051
SPEQ	Detect smells which don’t seem to come from your surroundings?	0.554	0.611	-0.169	0.42	0.447	-0.193	0.11	0.493	-0.062	0.276	0.123	0.186	0.345	0.419	-0.043	0.054	0.338	0.232	0.092	-0.019	0.422	0.074	0.195	0.038	0.094	0.021	0.605	-0.103	0.043	0.224	0.064	-0.056	0.006	0.161	0.626	-0.078	0.018	0.208	-0.016	-0.022	0.014	0.683	0.071	-0.006	-0.039	0.114	-0.001	-0.076
SPEQ	See things that other people cannot?	0.611	0.663	-0.157	0.435	0.522	-0.183	0.103	0.579	-0.027	0.238	0.12	0.202	0.369	0.498	0.029	0.019	0.37	0.217	0.148	0.06	0.459	0.053	0.206	0.114	0.063	0.068	0.683	-0.072	0.017	0.228	0.11	-0.009	-0.01	0.074	0.698	-0.047	0.001	0.224	0.053	0.032	0.056	0.728	-0.026	-0.001	0.013	0.126	-0.012	-0.008
SPEQ	Experience unusual burning sensations or other strange feelings in or on your body that can’t be explained?	0.604	0.646	-0.116	0.507	0.371	-0.131	0.08	0.425	0.047	0.338	0.095	0.235	0.403	0.318	-0.014	0.03	0.323	0.331	0.068	0.032	0.293	0.047	0.209	0.083	0.218	0.013	0.494	-0.047	0.01	0.228	0.047	0.093	0.034	0.157	0.521	-0.032	0.006	0.223	0.086	0.038	0.005	0.559	0.132	-0.016	0.017	0.154	0	0.045
SPEQ	See shapes, lights, or colours even though there is nothing really there?	0.613	0.656	-0.125	0.489	0.422	-0.143	0.095	0.476	0.025	0.309	0.116	0.2	0.414	0.387	0.009	0.046	0.33	0.298	0.077	0.049	0.383	0.064	0.192	0.088	0.161	0.004	0.592	-0.049	0.036	0.212	0.044	0.04	0.024	0.139	0.614	-0.025	0.023	0.204	0.054	0.034	-0.006	0.655	0.085	0.009	0.015	0.12	0.011	0
SPEQ	Hear voices commenting on what you’re thinking or doing?	0.622	0.662	-0.105	0.504	0.41	-0.12	0.058	0.476	0.078	0.3	0.078	0.247	0.408	0.362	0.038	-0.014	0.336	0.318	0.116	0.091	0.295	0.024	0.217	0.108	0.2	0.067	0.511	-0.002	-0.003	0.23	0.094	0.121	-0.011	0.106	0.529	0.015	-0.008	0.24	0.127	0.061	0.061	0.557	0.061	0.025	0.034	0.169	-0.013	0.087
SPEQ	Notice smells or odours that people next to you seem unaware of?	0.536	0.592	-0.163	0.421	0.407	-0.183	0.088	0.458	-0.043	0.282	0.104	0.176	0.352	0.389	-0.039	0.04	0.312	0.247	0.08	-0.011	0.393	0.061	0.18	0.023	0.119	0.021	0.561	-0.077	0.041	0.206	0.055	-0.035	-0.011	0.166	0.584	-0.053	0.013	0.19	-0.019	-0.014	0.012	0.641	0.099	0.006	-0.019	0.104	-0.002	-0.085
SPEQ	I have a special mission	0.186	0.335	-0.421	0.117	0.395	-0.43	-0.149	0.508	-0.275	0.095	-0.137	0.078	0.126	0.503	-0.15	-0.346	0.088	0.163	0.428	-0.085	0.137	-0.183	0.053	-0.154	0.128	0.471	0.151	-0.039	-0.1	0.053	0.395	0.087	-0.451	0.074	0.127	-0.034	-0.13	0.084	0.098	-0.158	0.496	0.127	-0.003	0.04	0.075	0.062	-0.088	0.075
SPEQ	I have many great ideas	0.003	0.174	-0.488	-0.102	0.455	-0.489	-0.136	0.549	-0.422	-0.074	-0.133	0.017	-0.057	0.593	-0.176	-0.378	0.05	-0.016	0.541	-0.134	0.159	-0.175	0.023	-0.233	-0.035	0.586	0.098	-0.07	-0.081	0.024	0.498	-0.028	-0.55	-0.004	0.062	-0.073	-0.121	0.039	-0.028	-0.179	0.602	0.047	-0.06	-0.018	0.113	0.03	-0.062	-0.068
SPEQ	Everything I do is great	-0.182	-0.029	-0.45	-0.314	0.435	-0.439	-0.073	0.486	-0.486	-0.249	-0.058	-0.156	-0.163	0.615	-0.126	-0.331	-0.129	-0.127	0.636	-0.085	0.136	-0.088	-0.134	-0.279	-0.123	0.681	-0.023	-0.011	-0.07	-0.116	0.636	-0.158	-0.518	0.032	-0.054	-0.022	-0.109	-0.121	-0.145	-0.078	0.704	-0.054	-0.04	-0.018	0.019	-0.125	-0.059	-0.176
SPEQ	I am, or am destined to be, someone very important	0.002	0.198	-0.57	-0.147	0.554	-0.535	-0.12	0.646	-0.48	-0.13	-0.105	-0.038	-0.049	0.707	-0.157	-0.431	-0.045	0.03	0.714	-0.083	0.09	-0.159	-0.052	-0.241	0.033	0.766	-0.008	-0.017	-0.133	-0.041	0.698	0.002	-0.574	0.061	-0.036	-0.031	-0.167	-0.018	-0.006	-0.093	0.788	-0.033	-0.005	-0.018	0.032	-0.026	-0.11	-0.038
SPEQ	I am a very special or unusual person	0.206	0.369	-0.467	0.04	0.587	-0.447	-0.067	0.676	-0.345	-0.022	-0.038	0.027	0.109	0.687	-0.093	-0.34	0.05	0.139	0.633	-0.011	0.166	-0.089	0.011	-0.2	0.102	0.672	0.139	0.034	-0.04	0.016	0.612	0.067	-0.539	0.059	0.102	0.038	-0.063	0.061	0.104	-0.107	0.705	0.11	-0.088	0.094	0.038	0.028	-0.007	0.045
SPEQ	I have special abilities that others do not	0.125	0.288	-0.468	-0.037	0.558	-0.452	-0.12	0.659	-0.343	-0.096	-0.094	-0.002	0.054	0.687	-0.061	-0.394	0.022	0.066	0.634	0.015	0.157	-0.149	-0.017	-0.161	0.033	0.677	0.14	0.037	-0.12	-0.007	0.621	0.021	-0.517	0.03	0.111	0.035	-0.147	0.025	0.057	-0.054	0.695	0.111	-0.086	0.054	0.053	-0.003	-0.095	0.026
SPEQ	I am much more unique than anyone else	0.17	0.317	-0.428	-0.013	0.577	-0.401	-0.037	0.649	-0.333	-0.079	-0.008	0	0.07	0.67	-0.058	-0.324	-0.002	0.115	0.673	0.029	0.104	-0.06	-0.029	-0.162	0.095	0.71	0.071	0.054	-0.058	-0.022	0.669	0.081	-0.488	0.044	0.041	0.049	-0.073	0.02	0.098	-0.025	0.732	0.05	-0.069	0.054	0.015	-0.004	-0.023	0.052
SPEQ	Everyone is going to know about me because of my greatness	0.04	0.22	-0.529	-0.17	0.641	-0.483	-0.016	0.697	-0.483	-0.183	0.01	-0.066	-0.048	0.76	-0.11	-0.346	-0.07	0.03	0.795	-0.028	0.094	-0.037	-0.077	-0.249	0.027	0.83	-0.019	0.029	-0.064	-0.057	0.798	-0.024	-0.539	0.081	-0.047	0.014	-0.086	-0.04	-0.031	-0.013	0.858	-0.04	0	-0.012	-0.007	-0.049	-0.036	-0.051
ICUT	I express my feelings openly (R)	0.297	0.193	0.271	0.296	-0.168	0.377	-0.066	-0.102	0.609	0.004	-0.01	0.001	0.361	-0.173	0.461	0.024	-0.067	0.218	-0.161	0.524	-0.1	0.008	-0.077	0.284	0.223	-0.12	-0.014	0.445	-0.021	-0.108	-0.143	0.369	0.172	-0.237	0.075	0.407	-0.001	-0.085	0.125	0.494	-0.241	0.021	0.076	0.112	0.317	-0.047	0.03	-0.056
ICUT	What I think is ‘right’ and ‘wrong’ is different from what other people think	0.255	0.295	-0.051	0.182	0.308	-0.119	0.036	0.352	-0.027	0.061	0.044	0.132	0.14	0.295	0.01	-0.076	0.137	0.135	0.266	0.05	0.099	0.032	0.095	-0.033	0.1	0.274	0.147	0.04	0.027	0.095	0.271	0.09	-0.176	0.03	0.13	0.045	0.033	0.108	0.075	0.04	0.291	0.108	0.017	0.009	0.068	0.099	0.057	0.074
ICUT	I care about how well I do at school or work (R)	0.299	-0.005	0.584	-0.049	0.231	0.516	0.51	0.03	0.245	-0.252	0.533	-0.067	0.015	0.033	0.349	0.443	-0.095	-0.027	0.251	0.357	-0.044	0.547	-0.111	0.237	-0.071	0.13	0.069	0.157	0.25	-0.076	0.321	-0.039	0.385	-0.012	0.058	0.157	0.332	-0.088	-0.031	0.458	0.099	0.131	-0.078	-0.035	-0.202	-0.111	0.312	0.021
ICUT	I do not care who I hurt to get what I want	0.279	0.168	0.252	0.013	0.433	0.133	0.255	0.399	0.075	-0.226	0.265	0.096	0.002	0.364	0.247	0.07	0.068	-0.025	0.497	0.277	0.036	0.272	0.031	-0.018	-0.016	0.512	-0.015	0.239	0.114	0.044	0.59	0.023	-0.11	-0.026	-0.047	0.227	0.127	0.039	-0.099	0.379	0.49	-0.034	0.058	-0.027	0.015	0.05	0.134	-0.072
ICUT	I feel bad or guilty when I do something wrong (R)	-0.026	-0.198	0.348	-0.261	0.191	0.271	0.213	0.124	0.125	-0.431	0.209	-0.002	-0.239	0.136	0.333	0.122	0.005	-0.323	0.267	0.308	-0.001	0.231	-0.011	0.071	-0.296	0.269	-0.068	0.231	0.036	0.011	0.368	-0.191	0.1	-0.148	-0.074	0.202	0.039	-0.023	-0.296	0.441	0.182	-0.012	-0.05	-0.074	-0.031	-0.021	0.017	-0.277
ICUT	I do not show my emotions to others	0.372	0.325	0.164	0.365	-0.024	0.239	-0.072	0.071	0.503	0.065	-0.009	0.002	0.444	0.015	0.384	-0.077	-0.114	0.355	0.104	0.483	-0.113	-0.004	-0.143	0.299	0.353	0.137	0.026	0.368	-0.004	-0.181	0.061	0.578	0.006	-0.339	0.148	0.292	0.031	-0.142	0.27	0.473	0.006	-0.002	0.084	-0.044	0.492	-0.077	0.108	0.003
ICUT	I do not care about being on time	0.27	0.11	0.329	0.012	0.321	0.233	0.439	0.161	-0.014	-0.085	0.451	-0.044	0.05	0.178	0.09	0.318	-0.076	0.092	0.365	0.112	0.007	0.451	-0.102	0.087	0.048	0.262	0.089	-0.017	0.259	-0.08	0.381	0.055	0.152	0.024	0.086	-0.025	0.327	-0.089	0.059	0.222	0.265	0.097	-0.014	-0.126	-0.105	-0.102	0.335	0.071
ICUT	I am concerned about the feelings of others (R)	0.133	-0.097	0.473	-0.144	0.191	0.412	0.209	0.141	0.346	-0.437	0.231	0.001	-0.085	0.124	0.51	0.143	0.006	-0.238	0.224	0.508	0.017	0.267	-0.005	0.006	-0.192	0.281	-0.147	0.497	0.054	0.026	0.4	-0.198	0.084	-0.019	-0.169	0.479	0.05	-0.013	-0.379	0.596	0.205	-0.09	0.114	0.113	-0.034	0.001	0.014	-0.337
ICUT	I do not care if I get into trouble	0.244	0.072	0.357	-0.041	0.356	0.245	0.476	0.182	-0.033	-0.145	0.471	0.033	-0.068	0.177	0.095	0.314	-0.03	0.01	0.452	0.107	-0.08	0.468	-0.056	0.154	-0.003	0.345	0.023	-0.064	0.249	-0.053	0.456	0.144	0.168	-0.134	0.038	-0.1	0.323	-0.061	0.092	0.294	0.311	0.016	-0.058	-0.286	-0.024	-0.059	0.332	0.09
ICUT	I do not let my feelings control me	-0.159	-0.161	-0.013	-0.177	0.003	-0.031	-0.076	0.032	-0.025	-0.189	-0.078	-0.062	-0.125	0.073	0.078	-0.098	-0.042	-0.174	0.068	0.063	0.032	-0.08	-0.06	0.07	-0.178	0.064	0.059	0.004	-0.069	-0.07	0.029	-0.028	-0.043	-0.232	0.102	-0.027	-0.076	-0.084	-0.056	0.084	0.001	0.052	-0.135	-0.104	0.173	-0.073	-0.044	-0.143
ICUT	I do not care about doing things well	0.367	0.156	0.436	0.08	0.299	0.36	0.431	0.156	0.183	-0.124	0.451	0.012	0.1	0.129	0.252	0.316	-0.054	0.111	0.349	0.285	-0.058	0.458	-0.072	0.165	0.083	0.268	0.03	0.139	0.207	-0.047	0.417	0.09	0.225	0.044	0.014	0.137	0.277	-0.043	0.067	0.391	0.261	0.054	0.017	-0.048	-0.154	-0.051	0.281	0.095
ICUT	I seem very cold and uncaring to others	0.404	0.323	0.227	0.269	0.231	0.205	0.043	0.296	0.39	-0.071	0.077	0.168	0.24	0.182	0.383	-0.031	0.131	0.133	0.208	0.441	-0.003	0.088	0.096	0.129	0.131	0.26	0.037	0.388	-0.002	0.084	0.291	0.218	-0.036	-0.105	0.041	0.376	0.022	0.109	0.087	0.443	0.231	-0.016	0.033	0.103	0.172	0.127	0.048	0.052
ICUT	I easily admit to being wrong (R)	0.122	0.025	0.217	-0.01	0.132	0.186	0.135	0.1	0.153	-0.155	0.14	0.065	-0.031	0.062	0.211	0.102	0.079	-0.094	0.091	0.208	0.022	0.159	0.073	-0.047	-0.072	0.131	-0.078	0.24	0.088	0.08	0.175	-0.071	-0.001	-0.026	-0.091	0.233	0.079	0.061	-0.212	0.269	0.092	-0.064	0.085	0.045	0.044	0.078	0.064	-0.203
ICUT	It is easy for others to tell how I am feeling (R)	0.134	0.031	0.247	0.072	-0.052	0.294	-0.044	0.001	0.436	-0.181	-0.008	-0.005	0.134	-0.036	0.432	-0.02	-0.034	-0.011	-0.012	0.463	-0.046	0.008	-0.052	0.211	0.002	0.031	-0.015	0.387	-0.044	-0.076	0.024	0.185	0.082	-0.283	0.051	0.347	-0.039	-0.068	-0.019	0.473	-0.087	0.007	-0.017	0.045	0.281	-0.038	-0.012	-0.167
ICUT	I always try my best (R)	0.379	0.019	0.649	-0.007	0.195	0.601	0.584	-0.045	0.281	-0.201	0.583	0.064	-0.062	-0.105	0.322	0.521	-0.036	-0.011	0.224	0.306	-0.209	0.58	-0.02	0.41	-0.065	0.029	0.062	0	0.187	0.036	0.254	-0.034	0.616	0.043	0.058	0.005	0.282	0.017	-0.073	0.467	-0.077	0.255	-0.011	-0.17	-0.343	-0.019	0.241	0.033
ICUT	I apologise to someone if I hurt them (R)	0.242	0.009	0.481	-0.078	0.306	0.384	0.274	0.244	0.31	-0.393	0.278	0.135	-0.116	0.17	0.464	0.166	0.124	-0.221	0.298	0.456	-0.009	0.312	0.109	0.005	-0.17	0.346	-0.145	0.433	0.081	0.141	0.468	-0.166	0.078	-0.01	-0.172	0.412	0.082	0.103	-0.375	0.576	0.258	-0.077	0.138	0.041	-0.049	0.115	0.043	-0.318
ICUT	I try not to hurt others’ feelings (R)	0.262	0.019	0.495	-0.094	0.373	0.369	0.28	0.322	0.301	-0.439	0.281	0.168	-0.146	0.238	0.488	0.146	0.173	-0.264	0.355	0.473	0.02	0.314	0.15	-0.031	-0.205	0.42	-0.147	0.461	0.08	0.189	0.543	-0.212	0.024	-0.003	-0.185	0.44	0.071	0.148	-0.426	0.589	0.328	-0.081	0.141	0.048	-0.05	0.16	0.029	-0.359
ICUT	I do not feel remorseful when I do something wrong	0.133	0.032	0.212	-0.056	0.261	0.129	0.217	0.209	0.031	-0.19	0.231	-0.034	-0.002	0.233	0.173	0.094	-0.072	-0.011	0.373	0.199	0.016	0.24	-0.096	0.014	-0.009	0.363	-0.015	0.148	0.095	-0.08	0.438	0.01	-0.02	-0.006	-0.028	0.132	0.113	-0.096	-0.078	0.305	0.342	-0.014	0.067	-0.062	-0.011	-0.091	0.115	-0.065
ICUT	I am very expressive and emotional (R)	-0.029	-0.155	0.274	-0.09	-0.141	0.329	-0.046	-0.113	0.405	-0.29	-0.014	-0.096	0.017	-0.106	0.445	0.02	-0.097	-0.153	-0.099	0.446	-0.022	0.01	-0.111	0.222	-0.145	-0.075	-0.004	0.355	-0.063	-0.121	-0.067	0.028	0.178	-0.298	0.078	0.308	-0.07	-0.146	-0.186	0.492	-0.232	0.083	-0.021	0.004	0.252	-0.123	-0.053	-0.335
ICUT	I do not like to put the time into doing things well	0.333	0.163	0.359	0.091	0.272	0.296	0.371	0.152	0.154	-0.087	0.397	-0.022	0.137	0.136	0.214	0.286	-0.059	0.128	0.286	0.247	-0.003	0.404	-0.078	0.152	0.071	0.19	0.117	0.1	0.204	-0.051	0.327	0.047	0.196	0.071	0.085	0.119	0.274	-0.039	0.09	0.279	0.206	0.128	-0.045	0.025	-0.167	-0.057	0.286	0.129
ICUT	The feelings of others are unimportant to me	0.107	0.012	0.199	-0.039	0.161	0.152	0.132	0.14	0.111	-0.182	0.159	-0.084	0.06	0.178	0.22	0.043	-0.129	0.023	0.299	0.255	-0.001	0.173	-0.137	-0.024	0.042	0.326	-0.087	0.25	0.078	-0.132	0.378	0.047	-0.082	0.003	-0.114	0.247	0.091	-0.13	-0.023	0.292	0.338	-0.139	0.06	0.065	0.015	-0.106	0.104	-0.013
ICUT	I hide my feelings from others	0.416	0.397	0.109	0.448	-0.048	0.195	-0.11	0.063	0.501	0.164	-0.044	0.022	0.513	-0.007	0.331	-0.097	-0.1	0.44	0.054	0.439	-0.108	-0.042	-0.128	0.28	0.433	0.091	0.041	0.344	-0.005	-0.172	-0.006	0.628	-0.02	-0.292	0.159	0.278	0.025	-0.127	0.323	0.402	-0.032	0.011	0.125	-0.015	0.502	-0.064	0.103	0.074
ICUT	I work hard on everything I do (R)	0.379	0.031	0.63	0.009	0.184	0.588	0.571	-0.05	0.275	-0.177	0.57	0.076	-0.055	-0.116	0.303	0.518	-0.018	-0.004	0.198	0.286	-0.204	0.569	-0.002	0.405	-0.059	0	0.071	-0.019	0.189	0.051	0.219	-0.029	0.617	0.042	0.072	-0.014	0.283	0.032	-0.068	0.441	-0.108	0.269	-0.011	-0.176	-0.332	-0.005	0.247	0.023
ICUT	I do things to make others feel good (R)	0.13	-0.103	0.478	-0.09	0.047	0.472	0.234	-0.036	0.381	-0.327	0.249	0.013	-0.071	-0.073	0.452	0.245	0.014	-0.197	0.023	0.436	-0.044	0.29	0.021	0.073	-0.157	0.051	-0.158	0.41	0.078	0.053	0.179	-0.18	0.251	0.008	-0.169	0.4	0.082	0.014	-0.347	0.534	-0.029	-0.063	0.126	0.095	-0.098	0.023	0.034	-0.305
AQ	I prefer to do things with others rather than on my own (R)	0.182	0.13	0.157	0.149	0.016	0.174	-0.23	0.131	0.379	-0.092	-0.183	0.03	0.217	0.082	0.369	-0.195	0.063	0.025	-0.062	0.402	0.084	-0.164	0.05	0.047	0.012	0.032	0.059	0.42	-0.14	0.045	0.019	0.023	-0.103	-0.045	0.039	0.434	-0.156	0.074	0.019	0.248	0.041	0.007	-0.063	0.316	0.105	0.071	-0.157	0.023
AQ	I find social situations easy (R)	0.452	0.297	0.431	0.448	-0.174	0.466	-0.254	-0.036	0.755	0.076	-0.142	-0.026	0.565	-0.11	0.564	-0.04	0.029	0.255	-0.38	0.614	0.146	-0.061	0.038	-0.031	0.224	-0.231	0.028	0.719	-0.002	0.037	-0.217	0.044	-0.015	0.148	-0.004	0.762	-0.02	0.088	0.056	0.293	-0.162	-0.005	0.028	0.676	0.02	0.07	-0.027	0.002
AQ	I would rather go to a library than to a party	0.218	0.175	0.138	0.257	-0.111	0.166	-0.396	0.07	0.474	0.009	-0.314	-0.06	0.401	0.05	0.399	-0.263	0.011	0.126	-0.242	0.441	0.194	-0.274	-0.001	-0.038	0.084	-0.113	0.13	0.529	-0.147	-0.009	-0.159	-0.002	-0.191	0.046	0.09	0.567	-0.187	0.032	0.043	0.143	-0.061	0.059	-0.058	0.539	0.123	0.016	-0.186	0.041
AQ	I find myself drawn more strongly to people than to things (R)	0.197	0.093	0.291	0.134	-0.004	0.31	-0.124	0.064	0.447	-0.131	-0.053	-0.06	0.256	0.042	0.446	-0.044	-0.004	0.024	-0.104	0.474	0.128	-0.005	-0.008	-0.024	0.008	-0.007	0.02	0.528	-0.031	0.003	0.028	-0.086	-0.028	0.05	0.007	0.544	-0.045	0.01	-0.111	0.341	0.012	0	0.023	0.387	0.041	0.004	-0.056	-0.119
AQ	I find it hard to make new friends	0.466	0.343	0.353	0.465	-0.117	0.381	-0.186	-0.008	0.652	0.14	-0.104	0.071	0.503	-0.12	0.444	-0.002	0.109	0.264	-0.356	0.484	0.109	-0.026	0.121	-0.054	0.242	-0.222	0.004	0.598	0.037	0.118	-0.216	0.068	-0.013	0.157	-0.028	0.637	0.025	0.163	0.055	0.215	-0.157	-0.03	0.066	0.575	0.024	0.154	0.022	0.01
AQ	I enjoy social occasions (R)	0.39	0.196	0.517	0.327	-0.126	0.55	-0.246	0.014	0.791	-0.105	-0.12	-0.086	0.494	-0.022	0.693	-0.072	-0.021	0.138	-0.257	0.745	0.156	-0.05	-0.026	0.049	0.106	-0.116	0.057	0.787	-0.068	-0.019	-0.068	-0.015	0.015	0.073	0.031	0.82	-0.082	0.027	0.02	0.457	-0.065	0.031	-0.052	0.65	0.005	0.001	-0.095	-0.015
AQ	I enjoy meeting new people (R)	0.344	0.157	0.501	0.286	-0.132	0.534	-0.17	-0.034	0.73	-0.096	-0.064	-0.065	0.423	-0.081	0.628	0.008	-0.005	0.107	-0.285	0.663	0.127	0.012	0	0.024	0.086	-0.158	0.008	0.718	-0.023	0.011	-0.101	-0.055	0.073	0.095	-0.009	0.747	-0.034	0.041	-0.045	0.432	-0.117	0	0.004	0.578	-0.02	0.021	-0.048	-0.095
AQ	New situations make me anxious	0.427	0.393	0.12	0.516	-0.174	0.151	-0.156	-0.086	0.413	0.369	-0.076	-0.022	0.576	-0.138	0.161	0.03	-0.008	0.448	-0.354	0.22	0.112	-0.02	0.006	-0.136	0.408	-0.263	0.03	0.375	0.107	0	-0.287	0.154	-0.061	0.277	0.009	0.418	0.094	0.027	0.1	0.002	-0.185	0.009	0.235	0.459	0.057	0.022	0.105	0.042
AQ	I usually notice car number plates or similar strings of information	0.175	0.258	-0.235	0.113	0.285	-0.249	-0.221	0.396	-0.046	0.015	-0.168	-0.013	0.206	0.408	0.061	-0.215	0.149	0.012	0.077	0.068	0.413	-0.173	0.039	-0.033	-0.117	0.054	0.539	0.03	0.042	0.012	-0.038	0.019	-0.352	-0.199	0.475	0.055	0.02	-0.025	-0.096	-0.028	0.023	0.344	-0.015	-0.013	0.53	-0.004	0.061	-0.014
AQ	I am fascinated by dates	0.26	0.356	-0.276	0.164	0.378	-0.29	-0.337	0.521	0.026	-0.003	-0.234	-0.054	0.33	0.525	0.161	-0.267	0.178	0.022	0.041	0.164	0.576	-0.209	0.041	-0.089	-0.147	0.031	0.684	0.149	0.085	0.007	-0.077	-0.001	-0.469	-0.221	0.57	0.188	0.05	-0.042	-0.167	0.011	0.018	0.382	0.029	0.073	0.681	-0.002	0.084	-0.002
AQ	I am fascinated by numbers	0.198	0.291	-0.268	0.096	0.372	-0.282	-0.386	0.529	0.044	-0.089	-0.291	-0.05	0.265	0.532	0.21	-0.322	0.195	-0.075	0.034	0.203	0.578	-0.271	0.055	-0.049	-0.241	0.029	0.697	0.167	0.024	0.02	-0.088	-0.035	-0.472	-0.307	0.579	0.201	-0.017	-0.027	-0.187	0.045	0.001	0.373	-0.045	0.062	0.716	0.015	0.026	-0.041
AQ	I often notice patterns in things	0.251	0.359	-0.304	0.192	0.33	-0.318	-0.29	0.473	-0.043	0.077	-0.226	0.014	0.286	0.467	0.049	-0.273	0.197	0.066	0.062	0.061	0.48	-0.233	0.07	-0.048	-0.084	0.044	0.631	0.03	0.042	0.035	-0.078	0.063	-0.432	-0.212	0.555	0.06	0.01	0.003	-0.07	-0.077	0.013	0.409	-0.008	0.009	0.614	0.022	0.061	0.007
AQ	I like to collect information about categories of things	0.279	0.368	-0.241	0.203	0.341	-0.255	-0.314	0.495	0.054	0.024	-0.234	0.004	0.322	0.481	0.155	-0.296	0.186	0.063	0.072	0.177	0.475	-0.231	0.071	-0.071	-0.079	0.087	0.578	0.174	0.014	0.045	-0.014	0.021	-0.441	-0.165	0.493	0.21	-0.02	0.02	-0.089	0.01	0.08	0.352	-0.014	0.132	0.555	0.038	0.018	0.012
SDQ	I try to be nice to other people. I care about their feelings (R)	0.171	-0.029	0.532	-0.116	0.291	0.503	0.334	0.174	0.346	-0.427	0.359	0.035	-0.081	0.129	0.516	0.26	0.083	-0.239	0.216	0.505	0.033	0.389	0.066	0.07	-0.222	0.235	-0.061	0.437	0.12	0.102	0.389	-0.214	0.201	-0.065	-0.048	0.413	0.155	0.057	-0.322	0.634	0.181	-0.034	0.033	0.04	-0.034	0.069	0.12	-0.286
SDQ	I usually share with others (food, games, pens etc.) (R)	0.118	-0.005	0.341	-0.04	0.146	0.338	0.095	0.119	0.315	-0.281	0.13	-0.004	0.025	0.092	0.415	0.09	0.054	-0.15	0.058	0.413	0.084	0.171	0.05	-0.02	-0.148	0.117	-0.033	0.424	0.034	0.077	0.204	-0.207	0.063	0.007	-0.033	0.42	0.04	0.05	-0.261	0.426	0.104	-0.031	0.031	0.184	-0.007	0.055	0.021	-0.245
SDQ	I am helpful if someone is hurt, upset or feeling ill (R)	0.094	-0.094	0.504	-0.109	0.128	0.495	0.197	0.049	0.397	-0.384	0.233	-0.034	-0.029	0.026	0.517	0.222	0.042	-0.24	0.013	0.495	0.084	0.289	0.037	0.02	-0.237	0.051	-0.044	0.478	0.087	0.074	0.184	-0.294	0.198	-0.013	-0.037	0.471	0.103	0.033	-0.342	0.536	0.024	-0.019	0.009	0.183	-0.059	0.036	0.062	-0.305
SDQ	I am kind to younger children (R)	0.142	0.002	0.39	-0.067	0.227	0.374	0.189	0.166	0.301	-0.329	0.205	0.071	-0.056	0.108	0.423	0.15	0.132	-0.215	0.112	0.407	0.066	0.233	0.109	0.075	-0.219	0.13	0.025	0.347	0.056	0.133	0.233	-0.187	0.139	-0.095	0.032	0.335	0.077	0.106	-0.24	0.467	0.087	0.033	-0.047	0.068	0.005	0.108	0.052	-0.214
SDQ	I often volunteer to help others (parents, teachers, children) (R)	0.104	-0.062	0.447	-0.06	0.086	0.444	0.304	-0.036	0.292	-0.248	0.326	-0.026	-0.027	-0.058	0.355	0.314	-0.003	-0.126	0.029	0.343	-0.019	0.357	-0.004	0.099	-0.121	0.009	-0.059	0.277	0.146	0.022	0.143	-0.137	0.291	-0.019	-0.039	0.266	0.185	-0.001	-0.165	0.424	-0.017	-0.009	-0.009	0.054	-0.118	-0.005	0.154	-0.166
SDQ	I am restless, I cannot stay still for long	0.395	0.369	0.078	0.237	0.358	0.043	0.515	0.186	-0.16	0.223	0.538	-0.037	0.234	0.211	-0.129	0.419	0.005	0.298	0.257	-0.084	0.166	0.525	-0.045	-0.146	0.219	0.156	0.191	-0.08	0.586	-0.075	0.156	0.267	-0.146	-0.059	0.144	-0.061	0.642	-0.064	0.169	-0.111	0.182	0.09	-0.03	-0.034	0.225	-0.054	0.701	0.053
SDQ	I am constantly fidgeting or squirming	0.456	0.425	0.094	0.306	0.346	0.062	0.464	0.194	-0.083	0.259	0.49	-0.002	0.298	0.193	-0.089	0.394	0.05	0.329	0.185	-0.041	0.189	0.483	-0.005	-0.138	0.243	0.098	0.224	-0.027	0.564	-0.037	0.085	0.28	-0.149	-0.054	0.18	-0.002	0.615	-0.02	0.182	-0.105	0.122	0.122	-0.028	0.028	0.254	-0.013	0.674	0.056
SDQ	I am easily distracted, I find it difficult to concentrate	0.513	0.442	0.205	0.365	0.294	0.181	0.632	0.07	-0.058	0.334	0.664	-0.055	0.355	0.085	-0.11	0.558	-0.066	0.462	0.214	-0.042	0.065	0.649	-0.101	-0.058	0.387	0.082	0.137	-0.074	0.619	-0.117	0.149	0.333	0.06	0.093	0.107	-0.047	0.701	-0.088	0.285	-0.06	0.135	0.113	0.028	0.013	0.005	-0.099	0.73	0.211
SDQ	I think before I do things (R)	0.272	0.156	0.308	0.083	0.252	0.28	0.546	0.052	0.019	0.009	0.548	0.055	0.015	0.014	0.038	0.487	0.062	0.072	0.164	0.04	-0.007	0.559	0.05	-0.024	0.058	0.084	-0.02	0.003	0.409	0.063	0.201	0.016	0.198	0.05	-0.025	0.003	0.467	0.05	-0.036	0.15	0.093	0.01	0.039	-0.075	-0.116	0.05	0.444	-0.019
SDQ	I finish the work I’m doing. My attention is good (R)	0.401	0.245	0.417	0.202	0.234	0.397	0.629	-0.001	0.129	0.087	0.643	0.041	0.143	-0.05	0.094	0.598	0.038	0.189	0.107	0.111	-0.016	0.646	0.014	0.091	0.144	-0.023	0.072	0.009	0.491	0.017	0.109	0.145	0.308	0.007	0.068	0.019	0.575	0.023	0.112	0.177	-0.02	0.103	-0.03	-0.046	-0.099	0.013	0.565	0.096
SDQ	I get a lot of headaches, stomach-aches or sickness	0.463	0.477	-0.023	0.494	0.046	-0.01	0.109	0.052	0.107	0.437	0.137	0.104	0.423	-0.019	-0.092	0.12	0.052	0.489	-0.032	-0.018	-0.005	0.119	0.033	0.016	0.454	-0.053	0.09	-0.004	0.129	0.025	-0.044	0.32	0.046	0.211	0.101	0.01	0.154	0.044	0.231	-0.023	-0.026	0.122	0.254	0.034	0.02	0.038	0.156	0.229
SDQ	I worry a lot	0.558	0.604	-0.104	0.701	-0.144	-0.063	-0.135	-0.045	0.247	0.645	-0.101	0.169	0.601	-0.174	-0.125	-0.045	0.062	0.68	-0.244	-0.027	-0.094	-0.105	0.082	-0.013	0.67	-0.196	-0.022	0.074	0.019	0.056	-0.254	0.48	-0.038	0.303	-0.027	0.105	0.03	0.115	0.396	-0.159	-0.124	-0.027	0.323	0.216	0.036	0.122	0.039	0.392
SDQ	I am nervous in new situations. I easily lose confidence	0.499	0.457	0.146	0.614	-0.242	0.186	-0.141	-0.156	0.469	0.469	-0.048	-0.056	0.691	-0.203	0.157	0.071	-0.071	0.58	-0.399	0.237	0.075	0.011	-0.046	-0.123	0.541	-0.309	-0.001	0.398	0.15	-0.06	-0.333	0.259	-0.035	0.327	-0.026	0.448	0.142	-0.014	0.209	-0.021	-0.213	-0.014	0.259	0.522	0.019	-0.023	0.154	0.129
SDQ	I have many fears, I am easily scared	0.544	0.581	-0.089	0.636	-0.052	-0.057	-0.003	-0.001	0.159	0.595	0.049	0.057	0.605	-0.063	-0.126	0.076	0.006	0.652	-0.164	-0.031	0.036	0.059	0.013	-0.144	0.617	-0.122	0.028	0.107	0.124	0.016	-0.126	0.289	-0.035	0.432	0.03	0.138	0.13	0.036	0.207	-0.109	-0.034	0.062	0.414	0.23	-0.037	0.029	0.131	0.215
SDQ	I get very angry and often lose my temper	0.484	0.451	0.107	0.397	0.222	0.101	0.315	0.151	0.093	0.281	0.327	0.178	0.274	0.052	-0.023	0.222	0.101	0.382	0.193	0.047	-0.095	0.307	0.092	0.033	0.38	0.168	-0.032	0.027	0.25	0.076	0.203	0.368	0.027	0.077	-0.044	0.03	0.305	0.106	0.232	0.1	0.181	-0.047	0.161	-0.046	0.036	0.125	0.31	0.237
SDQ	I usually do as I am told (R)	0.211	0.089	0.324	-0.029	0.332	0.286	0.542	0.137	0.01	-0.143	0.526	0.123	-0.132	0.077	0.099	0.425	0.127	-0.079	0.271	0.085	-0.046	0.521	0.105	0.074	-0.079	0.186	-0.014	-0.019	0.302	0.122	0.317	-0.021	0.239	-0.064	-0.002	-0.042	0.368	0.093	-0.095	0.281	0.151	0.017	0	-0.221	-0.079	0.102	0.344	-0.058
SDQ	I fight a lot. I can make other people do what I want	0.329	0.31	0.058	0.156	0.378	0.03	0.338	0.294	-0.066	0.054	0.335	0.15	0.061	0.236	-0.013	0.162	0.119	0.149	0.385	0.031	-0.026	0.3	0.084	0.042	0.137	0.338	0.049	-0.043	0.211	0.074	0.376	0.228	-0.039	-0.064	0.041	-0.057	0.259	0.076	0.088	0.156	0.31	0.023	0.066	-0.2	0.109	0.095	0.278	0.091
SDQ	I am often accused of lying or cheating	0.431	0.378	0.16	0.245	0.37	0.14	0.325	0.297	0.095	0.059	0.332	0.197	0.141	0.198	0.108	0.19	0.187	0.165	0.288	0.15	0.003	0.31	0.147	0.067	0.142	0.254	0.085	0.08	0.213	0.142	0.309	0.2	0.014	-0.043	0.074	0.076	0.261	0.16	0.112	0.203	0.242	0.069	0.003	-0.054	0.051	0.162	0.27	0.109
SDQ	I take things that are not mine from home, school or elsewhere	0.323	0.289	0.103	0.171	0.318	0.076	0.29	0.247	0.01	0.049	0.3	0.099	0.119	0.202	0.05	0.17	0.094	0.148	0.28	0.09	0.034	0.281	0.057	0.026	0.12	0.241	0.092	0.034	0.179	0.063	0.301	0.118	0.014	0.023	0.092	0.029	0.215	0.064	0.049	0.162	0.233	0.105	0.052	-0.071	0.006	0.058	0.215	0.058
SDQ	I am usually on my own. I generally play alone or keep to myself	0.482	0.398	0.258	0.437	0.047	0.284	-0.213	0.186	0.59	0.068	-0.133	0.097	0.486	0.085	0.474	-0.161	0.111	0.263	-0.088	0.552	0.088	-0.113	0.087	0.088	0.232	0.02	0.107	0.569	-0.051	0.065	-0.002	0.242	-0.133	-0.031	0.067	0.599	-0.046	0.136	0.223	0.288	0.056	0.015	-0.077	0.48	0.164	0.131	-0.027	0.185
SDQ	I have one good friend or more (R)	0.324	0.197	0.361	0.232	0.043	0.376	-0.021	0.074	0.504	-0.07	0.019	0.116	0.23	-0.034	0.435	0.023	0.121	0.067	-0.092	0.464	-0.004	0.06	0.127	0.06	0.078	-0.006	-0.061	0.482	-0.01	0.131	0.046	0.041	0.067	0.022	-0.081	0.494	0.001	0.164	0.015	0.356	0.017	-0.084	-0.008	0.331	-0.026	0.17	-0.036	0.068
SDQ	Other people my age generally like me (R)	0.42	0.279	0.406	0.313	0.075	0.419	0.013	0.097	0.567	-0.029	0.035	0.258	0.215	-0.094	0.439	0.106	0.298	0.03	-0.229	0.436	0.042	0.097	0.291	0.053	0.027	-0.152	0.008	0.464	0.037	0.298	-0.096	-0.03	0.141	0.023	-0.002	0.479	0.046	0.314	-0.068	0.339	-0.145	-0.001	0.009	0.317	0.001	0.315	0.02	-0.052
SDQ	Other children or young people pick on me or bully me	0.527	0.496	0.112	0.422	0.264	0.109	-0.054	0.336	0.34	0.129	-0.061	0.429	0.212	0.084	0.197	-0.07	0.441	0.138	-0.052	0.214	0.033	-0.028	0.42	-0.043	0.142	0.05	0.025	0.286	0.005	0.413	0.032	0.103	-0.111	0.041	-0.004	0.3	0.007	0.455	0.069	0.094	0.08	-0.025	0.003	0.243	0.062	0.46	0.021	0.071
SDQ	I get on better with adults than with people my own age	0.339	0.35	-0.011	0.304	0.153	-0.007	-0.113	0.241	0.191	0.132	-0.085	0.147	0.272	0.155	0.129	-0.154	0.138	0.215	0.073	0.186	0.049	-0.089	0.12	-0.023	0.201	0.145	0.058	0.228	-0.017	0.101	0.099	0.209	-0.21	0.003	0.028	0.241	-0.019	0.139	0.139	0.075	0.164	-0.013	0.035	0.184	0.163	0.151	0.003	0.139
EDDS	Have you felt fat?	0.513	0.615	-0.304	0.656	-0.305	0.002	0.082	-0.261	-0.005	0.762	0.029	0.405	0.204	-0.413	-0.415	0.086	0.043	0.613	-0.019	-0.324	-0.512	0.048	0.118	0.016	0.741	0.029	-0.501	-0.209	0.149	0.028	-0.119	0.802	-0.031	-0.003	-0.382	-0.24	0.061	0.066	0.106	-0.022	-0.261	-0.085	0.645	-0.405	0.224	0.147	0.072	0.017
EDDS	Have you had a definite fear that you might gain weight or become fat?	0.549	0.665	-0.348	0.7	-0.294	-0.039	0.056	-0.231	-0.018	0.805	0.004	0.418	0.243	-0.389	-0.443	0.053	0.05	0.662	-0.004	-0.343	-0.504	0.021	0.124	-0.006	0.785	0.052	-0.491	-0.213	0.134	0.034	-0.106	0.821	-0.069	0.036	-0.37	-0.243	0.045	0.073	0.114	-0.046	-0.232	-0.074	0.682	-0.396	0.24	0.153	0.057	0.028
EDDS	Has your weight influenced how you think about yourself as a person?	0.755	0.838	-0.469	0.842	-0.36	-0.034	0.045	-0.242	-0.006	0.937	-0.035	0.586	0.206	-0.434	-0.479	-0.022	0.042	0.73	0.165	-0.304	-0.64	0	0.131	0.023	0.879	0.234	-0.608	-0.166	0.083	0.033	0.059	0.969	-0.123	-0.004	-0.479	-0.216	-0.038	0.081	0.067	0.092	-0.154	-0.082	0.814	-0.483	0.272	0.181	-0.003	-0.012
EDDS	Has your shape influenced how you think about yourself as a person?	0.727	0.804	-0.439	0.807	-0.317	-0.037	0.045	-0.201	-0.002	0.885	-0.03	0.571	0.196	-0.394	-0.449	-0.028	0.056	0.693	0.179	-0.279	-0.611	0.001	0.139	0.035	0.831	0.239	-0.567	-0.159	0.072	0.048	0.077	0.926	-0.114	-0.008	-0.451	-0.207	-0.038	0.095	0.068	0.096	-0.126	-0.071	0.768	-0.468	0.257	0.19	-0.004	-0.009
SRDS	Have you ever stolen (or tried to steal) something?	0.284	0.225	0.155	0.114	0.33	0.073	0.252	0.27	0	-0.012	0.236	0.213	-0.019	0.176	0.041	0.131	0.194	0.029	0.278	0.047	-0.023	0.231	0.166	0.086	0.011	0.23	0.076	-0.048	0.103	0.175	0.289	0.072	0.068	-0.039	0.077	-0.065	0.145	0.182	0.066	0.133	0.215	0.08	-0.049	-0.144	-0.046	0.169	0.151	0.066
SRDS	Have you ever run away from home?	0.359	0.326	0.107	0.254	0.25	0.067	0.234	0.194	0.022	0.164	0.225	0.213	0.115	0.092	-0.035	0.148	0.162	0.199	0.195	-0.004	-0.054	0.22	0.144	0.048	0.19	0.16	0.028	-0.052	0.164	0.131	0.187	0.232	0.02	-0.004	0.025	-0.056	0.199	0.155	0.175	0.054	0.161	0.016	0.037	-0.106	0.012	0.159	0.208	0.173
SRDS	Have you ever attacked someone with the idea of seriously hurting or killing him or her?	0.328	0.275	0.146	0.15	0.366	0.056	0.235	0.325	0.02	-0.006	0.225	0.222	0.024	0.229	0.067	0.102	0.206	0.053	0.314	0.084	0.009	0.22	0.165	0.077	0.034	0.28	0.1	-0.005	0.103	0.168	0.329	0.108	0.02	-0.058	0.107	-0.027	0.134	0.165	0.028	0.192	0.246	0.107	0.017	-0.165	0.04	0.156	0.142	0.014
SRDS	Have you ever been involved in gang fights?	0.268	0.158	0.235	0.005	0.429	0.105	0.39	0.306	-0.099	-0.099	0.374	0.146	-0.093	0.257	0.025	0.229	0.132	-0.029	0.414	0.025	0.016	0.376	0.099	0.019	-0.049	0.346	0.065	-0.066	0.204	0.122	0.44	-0.017	0.055	-0.004	0.052	-0.084	0.247	0.098	-0.067	0.182	0.329	0.07	0.019	-0.209	-0.063	0.09	0.241	-0.023
SRDS	Have you ever hit (or threatened to hit) one of your parents?	0.299	0.231	0.18	0.187	0.183	0.153	0.21	0.132	0.123	0.057	0.207	0.174	0.079	0.043	0.086	0.14	0.109	0.128	0.176	0.112	-0.097	0.209	0.1	0.109	0.135	0.152	-0.026	0.042	0.096	0.096	0.208	0.188	0.102	-0.014	-0.03	0.032	0.129	0.107	0.095	0.207	0.13	-0.02	0.076	-0.104	-0.012	0.113	0.119	0.124
SRDS	Have you ever been loud, rowdy, or unruly in a public place?	0.282	0.213	0.164	0.084	0.374	0.06	0.377	0.251	-0.136	0.032	0.347	0.216	-0.083	0.174	-0.086	0.234	0.189	0.033	0.332	-0.088	-0.033	0.34	0.158	0.037	0.025	0.258	0.047	-0.175	0.225	0.156	0.309	0.12	0.057	-0.08	0.061	-0.205	0.264	0.144	0.026	0.08	0.218	0.065	0.018	-0.298	0.019	0.142	0.262	0.014
	Factor correlations	F1	F1	F2	F1	F2	F3	F1	F2	F3	F4	F1	F2	F3	F4	F5	F1	F2	F3	F4	F5	F6	F1	F2	F3	F4	F5	F6	F7	F1	F2	F3	F4	F5	F6	F7	F8	F1	F2	F3	F4	F5	F6	F7	F8	F9	F1	F2	F3
	F1	1	1	0.253	1	0.083	0.057	1	0.184	0.279	0.088	1	0.234	0.103	0.058	0.104	1	0.133	0.027	0.178	0.163	-0.034	1	0.183	0.191	0.057	0.037	0.082	0.125	1	0.192	0.164	0.092	0.193	0.076	0.079	0.092	1	0.257	0.109	0.282	0.053	0.144	0.162	-0.009	-0.14	1	0.294	0.266
	F2			1		1	0.232		1	0.27	0.267		1	0.428	0.102	0.052		1	0.465	0.196	0.223	-0.013		1	0.103	0.409	0.123	0.197	0.159		1	0.143	0.427	0.035	0.22	0.201	0.193		1	0.298	0.208	0.124	0.188	0.382	0.135	0.157		1	0.188
	F3						1			1	0.201			1	0.005	-0.068			1	0.083	0.159	0.147			1	0.011	0.07	-0.038	0.149			1	0.032	0.231	-0.023	0.187	0.086			1	0.135	-0.016	0.259	0.427	0.155	0.111			1
	F4										1				1	0.002				1	0.084	0.132				1	0.037	0.363	0.08				1	-0.013	0.373	0.355	0.224				1	0.001	0.066	0.002	0.088	-0.062
	F5															1					1	-0.008					1	0.197	0.03					1	-0.082	0.034	0.194					1	0.241	0.058	0.017	0.093
	F6																					1						1	0.124						1	0.197	-0.008						1	0.187	0.132	0.001
	F7																																			1	0.178							1	0.206	0.079
	F8																																				1								1	0.139
	F9																																													1
	F10
	F11
	F12
	F13
	F14
	Fit indices	1-factor	2-factor		3-factor			4-factor				5-factor					6-factor						7-factor							8-factor								9-factor									10-factor
	CFI	0.556	0.675		0.747			0.808				0.865					0.89						0.912							0.929								0.941									0.95
	TLI	0.551	0.668		0.738			0.799				0.858					0.882						0.905							0.922								0.934									0.943
	RMSEA	0.042	0.037		0.032			0.028				0.024					0.022						0.02							0.018								0.016									0.015
	SRMR	0.119	0.096		0.082			0.065				0.056					0.051						0.047							0.044								0.04									0.037
Notes: Bold indicates primary loadings (≥0.35) with at least │0.10│ difference from the second largest loading in the same factor structure.
All items were scored in the direction of difficulties or reversed-coded where necessary, so that higher scores reflected more severe difficulties.
Abbreviations:
(R)=reversed item
AQ=Abbreviated Autism Spectrum Quotient
CASI=Children's Anxiety Sensitivity Index
CFI=comparative fit index. Adequate when ≥0.90
EDDS=Eating Disorder Diagnostic Scale
ICUT=Inventory of Callous-Unemotional Traits
O-LIFE=Oxford-Liverpool Inventory of Feelings and Experiences (O-LIFE) Introvertive Anhedonia
RMSEA=root mean square error of approximation. Adequate when ≤0.08D&E
SDQ=Strenghts and Difficulties Questionnaire
SMFQ=Short Moods and Feelings Questionnaire
SPEQ=Specific Psychotic Experiences Questionnaire
SRDS=Self Report Delinquency Scale
SRMR=standardized root mean square residual. Adequate when ≤0.08
SWAN=Strengths and Weaknesses of Attention-Deficit/Hyperactivity Disorder Symptoms and Normal Behavior Scale
TFI=Tucker-Lewis index. Adequate when ≥0.90
[truncated: 57 more columns]

## Sheet: ST9
Supplementary Table 9. Phenotypic associations from linear random-intercept models between neurodevelopmental factors at ages 7, 12 and 16 based on parent-reports, and at age 16 based on parent- and self-reports.
	coeff	SE	t	p	R2
Association between ages 7-12	0.380826	0.00841649	45.2476	0	0.138615
Association netween ages 7-16	0.337027	0.00962902	35.0011	2.13774e-249	0.109144
Association between ages 12-16	0.629461	0.00879984	71.531	0	0.397573
Association at age 16 between parent and self-reports	0.19332	0.010165	19.0182	3.5224e-79	0.0373057
Notes: Bold denotes statistically significant (p<0.05) p values.
Abbreviations:
coeff=standardised beta coefficient
R2=R squared (variance explained)
SE=standard error

## Sheet: ST10____
Supplementary Table 10. Results of univariate twin analyses on neurodevelopmental factors at age 7, 12 and 16, including twin correlations and estimates of genetic and environmental effects.
	N pairs		Twin correlation		ACE models									ADE models
Variable	MZ	DZ	rMZ	rDZ	A	A lower CI	A upper CI	C	C lower CI	C upper CI	E	E lower CI	E lower CI	A	A lower CI	A upper CI	D	D lower CI	D upper CI	E	E lower CI	E lower CI
Age 7 (parent-report)	2707	4904	0.626229	0.18953	0.5986	0.575287	0.620812	0	2.31587e-34	0.00532761	0.4014	0.379188	0.424713	0.110614	0.00277174	0.217115	0.526345	0.415394	0.638561	0.363041	0.343426	0.383907
Age 12 (parent-report)	2216	3961	0.838219	0.445844	0.7909	0.741544	0.841838	0.049	8.25658e-35	0.0966628	0.1601	0.150204	0.170852	0.840569	0.830099	0.85031	2.65456e-12	8.40747e-26	0.0417317	0.159431	0.14969	0.169901
Age 16 (parent-report)	1836	3261	0.818034	0.406594	0.824	0.811114	0.835995	0	3.02816e-36	0.0404972	0.176	0.164005	0.188886	0.791213	0.67819	0.835518	0.0331793	1.93483e-35	0.146955	0.175608	0.163701	0.188525
Age 16 (self-report)					0.515865	0.442521	0.543825	0	0	0.0574981	0.484135	0.456175	0.513461
Notes: both ACE and ADE models were ran for completeness across time given twin correlations suggesting the presence of non-additive genetic effects (requiring testing of an ADE model instead of an ACE model) at age 7 but not at age 12 and 16.
Bold denotes statistically significant (p<.05) effects, where the 95% confidence interval does not cross 0.
Abbreviations:
A=additive genetic effects
ACE=model testing additive genetic (A), common environmental (C) and individual-specific environmental (E) effects
ADE=model testing additive genetic (A), non-additive genetic (D) and individual-specific environmental (E) effects
C=common environmental effects
CI=95% confidence interval
D=non-additive genetic effects
DZ=dizygotic twins
E=individual-specific environmental effects
MZ=monozygotic twins

[truncated: 6 more sheets: ST11, ST12, ST13, ST14, ST15, ST16_____]
